# Supplementary material
Source: publisher figshare collection journal article supplement (https://rs.figshare.com/ndownloader/files/24121837)
Supplement: Supplementary file 1 [file 24121837]

# **Why do human and nonhuman species conceal mating?**

## **The cooperation maintenance hypothesis**

**Yitzchak Ben Mocha**

Department of Anthropology, Zürich University, Winterthurerstrasse 190  
8057, Zürich, Switzerland

Department of Primatology, Max Planck Institute for Evolutionary Anthropology, Leipzig,  
Germany

Max Planck Institute for Ornithology, Seewiesen, Germany

Max Planck Institute for Animal Behavior, Konstanz, Germany

[yitzchakbm@gmail.com](mailto:yitzchakbm@gmail.com)

Ben Mocha Y. 2020 Why do human and nonhuman species conceal mating? The  
cooperation maintenance hypothesis. Proceedings of the Royal Society B.

<http://dx.doi.org/10.1098/rspb.2020.1330>

## **Appendix 1: Methods for cross-cultural ethnographic survey**

I systematically reviewed the "*electronic Human Relation Area Files World Cultures*" (hereafter eHRAF World Cultures; n=249 cultures, >4,572 documents). This database contains ethnographic collections covering all aspects of cultural and social life. Ethnographies are each indexed at the paragraph level with codes for different topics. For each culture, I reviewed all paragraphs coded with at least one of the following 12 codes of sexual behaviour: "*Sex*", "*Extramarital sex relations*", "*General sex restrictions*", "*Homosexuality*", "*Kinship regulation of sex*", "*Miscellaneous sex behavior*", "*Premarital sex relations*", "*Sexual intercourse*", "*Sexual stimulation*", "*Sexuality*", "*Sexual training*" and "*Sex and marital offenses*" (n>25,608 relevant paragraphs from >1,882 relevant documents). In cases where a certain paragraph was dependent on previous paragraphs, I read throughout the document until an adequate understanding was ensured. For the geographical distribution of the examined cultures see Appendix 2.

Informants from diverse and distinct cultures were reported to be reluctant to discuss sexual matters (e.g., Broude and Greene, 1976; Gorer and Hutton, 1938; Mead, 1961; Stirling, 1965; Suggs, 1963). As a result, explicit statements on whether legitimate mating is concealed were not always available. Coding decisions were, therefore, based on a holistic understanding of all sexual practices within the culture in question (see also Clause 18 below), and the analysis of all ethnographies included in the eHRAF World Cultures (many of which were written by different ethnographers describing different communities and/or different historical periods of the same culture) allowed within-culture cross-validation of sexual practices.

For each culture, I coded three variables. First, whether pairs regularly take efforts to conceal legitimate mating (see Glossary), at least partially (see Clause 2), from the sensory perception (see Glossary) of conspecifics (yes/no). The following considerations were used to reach a decision for this variable (Table 1):

1. The starting assumption was that customs of public mating are a remarkably unusual phenomenon for Western anthropologists and will, therefore, be reported if observed (for examples see Crocker, 1990; Elwin, 1947). Hence, the absence of reports on public mating was taken as the first evidence for concealment. Nevertheless, the absence of reports on public mating was not considered to be sufficient evidence for the practice of concealed mating.
2. Evidence that pairs regularly take efforts to conceal *at least some* sensory stimuli from conspecifics was required. For example, if pairs made sure to have sexual intercourse quietly when co-residents were sleeping in the same room (i.e. audible concealment; for example see Beardsley et al., 1972), or when pairs divide the dwelling with a curtain for sexual privacy, even though co-residents may be able to hear some stimuli (i.e. visual concealment, for instance, Hudson, 1938).
3. I examined whether efforts to conceal mating were regularly made and not whether they were often successful. For instance, pairs were considered to conceal mating if they usually wait to have sexual intercourse until co-residents sleep; although the latter may sometimes pretend to be asleep so they can observe the mating.
4. I focused on sexual practices between normative members of society. Therefore, sexual practices of, for example, religious priests, the warrior class and the rape of prisoners of war were not considered other than as background information.

5. I focused on everyday sexual practices. Sexual practices that were only held in special contexts, such as at festivals or as punishments, were not considered other than as background information. See Appendix 6 for customs of public mating under special contexts.
6. An exception to Clause 5 is the first night of wedlock. Concealment during the first night of wedlock was considered as indirect evidence for the concealment of legitimate mating in everyday life. Cultures that only had indirect evidence for concealment are marked in Appendix 3 with “?”.
7. I focused on matrimonial sexual practices between adults. Legitimate pre-matrimonial matings by adolescents were considered as background information.
8. Efforts of a pair to conceal mating from the sensory perception of dependent children were considered as evidence for the concealment of legitimate mating. However, the absence of efforts to conceal marital mating from children was not considered as evidence for the absence of concealment from adults.
9. Due to the basic assumption described in Clause 1, statements that describe the attitude towards sexuality as “rigorously modest” were also considered as evidence for the sensory concealment of legitimate mating (when “modesty” or “chastity” clearly referred to sexual behaviour and not to sexual promiscuity). For instance, “*complete hush and excessive secrecy prevails over sexual matters among adolescents as well as adults*” (Ammār, 1954, pp. 190–192) and “*any open reference to sex is severely shunned by the rather prudish Nupe. Sex and privacy go together*” (Nadel, 1954, p. 113).

10. Lack of evidence for public mating combined with poor data that suggests sexual modesty was considered as indirect evidence for concealed mating. These cultures are marked in Appendix 3 with “?”.

| <b>Table 1.</b> Coding criteria for concealment of legitimate mating in humans. |                                                                                                                                                                                                                                                                                                                                          |
|---------------------------------------------------------------------------------|------------------------------------------------------------------------------------------------------------------------------------------------------------------------------------------------------------------------------------------------------------------------------------------------------------------------------------------|
| Code                                                                            | Criteria                                                                                                                                                                                                                                                                                                                                 |
| NA<br>(Not Available)                                                           | No references to mating concealment<br><br>OR<br><br>References to sexual behaviour are available and do not report legitimate mating being public.                                                                                                                                                                                      |
| Yes?                                                                            | References to sexual behaviour are available and do not report legitimate public mating<br><br>AND<br><br>Evidence for concealment during the first night of marriage<br><br>AND/OR<br><br>Data suggesting sexual modesty is poor                                                                                                        |
| Yes                                                                             | References to sexual behaviour are available and do not report legitimate public mating<br><br>AND<br><br>Explicit statements about regular efforts to conceal legitimate mating from the sensory perception of conspecifics<br><br>AND/OR<br><br>General description of attitudes towards sexuality states they are “rigorously modest” |
| No                                                                              | Explicit statements that no efforts are taken to conceal legitimate mating from the sensory perception of conspecifics                                                                                                                                                                                                                   |

The second variable that was coded is: whether social norms entitle husbands and/or wives to have at least some control over sexual access to their spouse(s) (yes/no). The following considerations were used to code this variable:

11. To code “yes”, I required evidence that at least one spouse (husbands and/or wives) was entitled to control sexual access to his/her spouse *at least to some extent*. Examples of evidence include reports of punishment for adultery and supervision of the wife by family members during the absence of the husband. An example of extreme sexual control is when both spouses strictly forbid each other to have extramarital sex. An example of mild sexual control is that spouses allow each other to have occasional extramarital sex and only sanction extramarital sex if it becomes too frequent or more important than the matrimonial relationship. For the code “no”, I required evidence that social norms entitle both spouses to have unrestricted extramarital sex with any group member they desire. For example, if both spouses allowed each other to have extramarital sex without limitation on its frequency, timing (e.g., not only during festivals) or the identity of the extramarital sexual partner.
12. I examined whether social norms entitle mating control and not whether these norms are successfully enforced. Namely, reports that adultery is common were not considered as evidence against attempts to achieve greater mating control.
13. I focused on sexual norms among normative members of society. For instance, I did not consider the sexual practices of religious priests, royal or warrior classes and the rape of prisoners of war other than as background information.
14. I focused on sexual practices found in everyday life. Permissive sexual practices that were only allowed in special contexts (e.g., religious ceremonies and festivals) were considered as background information and not as evidence for the absence of mating control.

15. I focused on matrimonial sexual practices among adults. Pre-matrimonial matings by adolescents were considered as background information only.

The third variable that was coded is: whether pairs, at least occasionally, reveal the time and/or location of future matings in a way that enables others to interrupt the planned mating? (yes/no). The following considerations were used to code this variable:

16. To code yes, I required evidence for norms and/or regular behavioural patterns in which pairs, at least occasionally, reveal the time and/location of their future legitimate mating to other persons in a way that enables the latter to interrupt the mating if wanted. For example, when the bride and the groom consummate the marriage in a closed room while the wedding guests wait outside, or when the pair seek help from friend or parents to achieve privacy for mating.
17. To code no, I required evidence that pairs rigorously concealed information about the time and/or location of their future mating from conspecifics.

The following considerations were used to reach a decision for all three variables:

18. Within-culture variation: with regards to the variables coded, no significant contradictions were found between ethnographies that described the same culture. The only exception being the Goajiro from Colombia as represented in Appendix 3 by two entries that indicate the different periods and attitudes toward mating concealment.
19. The principal authority for each culture represents the ethnography with the strongest evidence. Although for some cultures, evidence of mating concealment from principal authorities was not sufficient to stand alone and coding decisions were based on additional sources.

20. The eHRAF World Cultures' classifications were followed regarding names of cultures and geographical classification.
21. The categorisations of the eHRAF World Cultures and White (1989) were followed regarding sources that are included in the Ethnographic Atlas (EA) and the Standard Cross-Cultural Sample (SCCS). All other ethnographic sources were categorised as belonging to the "survey" sample.
22. Cultures were included in the SCCS/EA or the survey samples according to the status of the ethnographic sources that supported the coding decision. If strong ethnographic sources with different statuses were available, priority was first given to sources from the Standard Cross-Cultural Sample, then to sources from the Ethnographic Atlas and lastly to the survey sample.

To ensure the reliability of coding decisions, the procedure used by Broude and Greene (1976) was modified: the author (n=178 cultures)/research assistant (n=71 cultures) read all sex-coded paragraphs, coded different variables and marked paragraphs that described relevant information regarding the tested variables. Next, the research assistant/author, blind to the other's coding decisions, read only the paragraphs that were marked as relevant and re-coded this culture. Cases of disagreement between the two coders (1/132 cultures for sensory concealment of mating; 2/210 cultures for mating control; 7/43 cultures for concealment of information), were discussed by a joint reading of the original paragraphs. Cases for which an agreement could not be obtained were omitted from the survey (n=0).



**Appendix 3.** Concealment of legitimate mating in 249 human cultures (for the geographical distribution of the examined cultures see Appendices 4-5)

| <b>Culture*</b><br>(sub-region*)   | <b>Is legitimate sexual intercourse concealed?</b><br>(sample) | <b>Examples for concealment of sexual interactions**</b><br>(principal authority)                                                                                                                          |
|------------------------------------|----------------------------------------------------------------|------------------------------------------------------------------------------------------------------------------------------------------------------------------------------------------------------------|
| <b>Africa</b>                      |                                                                |                                                                                                                                                                                                            |
| Azande<br>(Central Africa)         | Yes? <sup>(EA)</sup>                                           | <i>“They go quietly into the bush or into a neighbouring hut and have intercourse”</i> (Evans-Pritchard, 1928, pp. 457–458)                                                                                |
| Barundi<br>(Central Africa)        | Yes <sup>(survey)</sup>                                        | <i>“A man is privileged, if not obliged, to sleep with all his wives...Nevertheless, men must discharge their sexual obligations in secret”</i> (Albert, 1963, p. 193)                                     |
| Mbuti<br>(Central Africa)          | Yes <sup>(SCCS)</sup>                                          | <i>“Youths could have sex whenever they wanted (within minimal bounds of privacy and respect for others)”</i> (Turnbull, 1983, p. 34, 1962)                                                                |
| Mongo<br>(Nkundu) (Central Africa) | Yes <sup>(SCCS)</sup>                                          | <i>“A natural shame which makes them seek darkness and privacy for acts of this sort”</i> (Hulstaert and Vizedom, 1938, p. 84)                                                                             |
| Teda<br>(Central Africa)           | Yes? <sup>(SCCS)</sup>                                         | (Le Coeur and Schütze, 1950)                                                                                                                                                                               |
| Amhara<br>(Eastern Africa)         | Yes? <sup>(SCCS)</sup>                                         | (Levine, 1965, pp. 85; 102; Messing and Bender, 1985, pp. 208; 214)                                                                                                                                        |
| Bena<br>(Eastern Africa)           | Yes? <sup>(EA)</sup>                                           | (Culwick et al., 1935, p. 356)                                                                                                                                                                             |
| Ganda<br>(Eastern Africa)          | Yes <sup>(SCCS)</sup>                                          | It is taboo to have sex when other people are in the house (Kagwa et al., 1934, p. 101; Southwold, 1965, p. 103)                                                                                           |
| Gikuyu<br>(Eastern Africa)         | Yes <sup>(SCCS)</sup>                                          | <i>“Gikuyu consider such public display [kissing] of affection vulgar”</i> (Kenyatta, 1953, p. 156)                                                                                                        |
| Hadza<br>(Eastern Africa)          | Yes <sup>(survey)</sup>                                        | <i>“Sex usually occurs at night in the hut or around the hearth while others are sleeping. One never hears people having sex, so couples are careful to be discreet and quiet”</i> (Marlowe, 2010, p. 174) |
| Kaffa<br>(Eastern Africa)          | Yes? <sup>(survey)</sup>                                       | Relatives of the bridegroom leave the room to allow private consummate of marriage (Grühl et al., 1884, p. 232)                                                                                            |
| Maasai<br>(Eastern Africa)         | Yes <sup>(SCCS)</sup>                                          | <i>“They do not customarily cohabit except at night. They are afraid of coitus in daylight”</i> (Merker, 1910, p. 65)                                                                                      |

|                               |                         |                                                                                                                                                                                                                                                                                                                                                                                                                                                                                                                                                                                                                                                                                                                                                                                                                                                                                                                   |
|-------------------------------|-------------------------|-------------------------------------------------------------------------------------------------------------------------------------------------------------------------------------------------------------------------------------------------------------------------------------------------------------------------------------------------------------------------------------------------------------------------------------------------------------------------------------------------------------------------------------------------------------------------------------------------------------------------------------------------------------------------------------------------------------------------------------------------------------------------------------------------------------------------------------------------------------------------------------------------------------------|
| Okiek<br>(Eastern Africa)     | Yes <sup>(survey)</sup> | The sexual realm is muted among circumcised people (Kratz, 1991, p. 833)                                                                                                                                                                                                                                                                                                                                                                                                                                                                                                                                                                                                                                                                                                                                                                                                                                          |
| Fellahin<br>(Northern Africa) | Yes <sup>(SCCS)</sup>   | <i>“Complete hush and excessive secrecy prevails over sexual matters among adolescents as well as adults”</i> (Ammār, 1954, pp. 190–192)                                                                                                                                                                                                                                                                                                                                                                                                                                                                                                                                                                                                                                                                                                                                                                          |
| Tuareg<br>(Northern Africa)   | Yes? <sup>(SCCS)</sup>  | (Benhazera and Coleman, 1908, p. 8)                                                                                                                                                                                                                                                                                                                                                                                                                                                                                                                                                                                                                                                                                                                                                                                                                                                                               |
| Khoi<br>(Southern Africa)     | Yes <sup>(SCCS)</sup>   | Husbands move to another part of the hut when they lend their wives (Schapera, 1930, p. 253)                                                                                                                                                                                                                                                                                                                                                                                                                                                                                                                                                                                                                                                                                                                                                                                                                      |
| Shona<br>(Southern Africa)    | Yes <sup>(survey)</sup> | <i>“One Shona custom that I learnt was that we should show love more by our deeds rather than by words. There is less sentimentality among us and little display of love in public”</i> (Gelfand, 1979, p. 25)                                                                                                                                                                                                                                                                                                                                                                                                                                                                                                                                                                                                                                                                                                    |
|                               |                         | <i>““The act of love”, the Karanga says, “should take place in seclusion, the place and the time are sacred””</i> (Aschwanden and Cooper, 1982, p. 3)                                                                                                                                                                                                                                                                                                                                                                                                                                                                                                                                                                                                                                                                                                                                                             |
|                               |                         | <i>“In the seclusion of their home, man and wife may talk plainly about anything to do with sex, such talk stimulates their love-play. But in public, there are only a few, strictly defined, occasions when such talk is permitted. This is one of the reasons why all direct sexual references are forbidden in public: there they have an obscene and shocking effect. “Nobody would use such terms unintentionally”, the Karanga says [...] Nowadays, when nearly all sexual inhibitions have been dropped, we can see the wisdom of the Karanga's traditional upbringing, which took into account both extremes of sexual behaviour and yet managed to keep them balanced: great freedom in private on the one hand, strict taboos in public on the other. When the balance was disturbed, the pendulum swung heavily in the direction of the unrestrained extreme”</i> (Aschwanden and Cooper, 1982, p. 49) |
|                               |                         | <i>“Such parts of the human body must never be exposed to view publicly. A woman who places a chihadyana where everybody can see it shows the most intimate parts of her body. This turns a body into something commonplace and kills all desire for it, the Karanga say. It is like telling everybody the secret of one's private love-life, whereas love should be hidden — like glowing embers under the ashes”</i> (Aschwanden and Cooper, 1982, p. 193)                                                                                                                                                                                                                                                                                                                                                                                                                                                      |
| Mende<br>(Western Africa)     | Yes <sup>(SCCS)</sup>   | <i>“It is equally against etiquette for any show of intimacy, other than a hand clasp, to be made in public, even if the parties concerned are lovers”</i> (Little, 1951, p. 130)                                                                                                                                                                                                                                                                                                                                                                                                                                                                                                                                                                                                                                                                                                                                 |

|                                  |                         |                                                                                                                                                                                                                                                                                                               |
|----------------------------------|-------------------------|---------------------------------------------------------------------------------------------------------------------------------------------------------------------------------------------------------------------------------------------------------------------------------------------------------------|
| Nupe<br>(Western Africa)         | Yes <sup>(EA)</sup>     | <i>“Any open reference to sex is severely shunned by the rather prudish Nupe. Sex and privacy go together”</i> (Nadel, 1954, p. 113)                                                                                                                                                                          |
| Songhai<br>(Western Africa)      | Yes <sup>(SCCS)</sup>   | High modesty in clothing, one must not be seen naked (Rouch, 1954, p. 49)                                                                                                                                                                                                                                     |
| Tallensi<br>(Western Africa)     | Yes? <sup>(SCCS)</sup>  | <i>“Tallensi are horrified at the suggestion that children who ‘have sense’ might witness sexual relations between their parents”</i> (Fortes, 1949, p. 193)                                                                                                                                                  |
| <b>Asia</b>                      |                         |                                                                                                                                                                                                                                                                                                               |
| Abkhazians<br>(Caucasus)         | Yes <sup>(SCCS)</sup>   | <i>“Extreme modesty is required at all times”</i> (Benet, 1974, p. 86)                                                                                                                                                                                                                                        |
| Kazakh<br>(Central Asia)         | Yes <sup>(SCCS)</sup>   | A shared dwelling is divided by a curtain for sexual privacy (Hudson, 1938, p. 39)                                                                                                                                                                                                                            |
| Lepcha<br>(Central Asia)         | Yes <sup>(SCCS)</sup>   | <i>“These legitimate copulations must be practised discreetly”</i> (Gorer and Hutton, 1938, p. 326)                                                                                                                                                                                                           |
| Mongolia<br>(Central Asia)       | Yes <sup>(SCCS)</sup>   | <i>“The wealthier and more dignified families considered the public expression of marital intimacy to be extremely bad taste”</i> (Vreeland, 1973, p. 241)                                                                                                                                                    |
| Tibetans<br>(Central Asia)       | Yes <sup>(survey)</sup> | <i>“When one of her husbands visits the wife in her private room at night, he hangs his rosary on her door; should another husband come in, he will feel for the rosary, and if it is there, will quietly retire”</i> (Sherap and Combe, 1926)                                                                |
| Manchu<br>(East Asia)            | Yes <sup>(SCCS)</sup>   | <i>“Kissing is considered a pure sexual act and should be made stealthily”</i> (Shirokogorov, 1924, p. 101)                                                                                                                                                                                                   |
| Miao<br>(East Asia)              | Yes <sup>(survey)</sup> | <i>“The act of sexual intercourse may take place in the woods...or in another house”</i> (Graham, 1937, p. 34)                                                                                                                                                                                                |
| Okayama<br>(East Asia)           | Yes <sup>(SCCS)</sup>   | <i>“The husband, after waiting in the quilts at night for the rest of the household to settle into slumber, grasps his wife and satisfies himself as quietly and inconspicuously as possible”</i> (Beardsley et al., 1972, p. 333)                                                                            |
| Taiwan<br>Hokkien<br>(East Asia) | Yes <sup>(survey)</sup> | <i>“The occurrence of the “Victorian” view is not unique to K'un Shen or to Taiwan. It is a traditional Chinese attitude... Sexual joking or shows of affection do not take place in the presence of others, be they family members or outsiders”</i> (Diamond, 1969, pp. 60–62; see also Wolf, 1972, p. 139) |

|                                |                          |                                                                                                                                                                                                                                                                                                                                                                                                                                                                                                                                                                                                                                                                                                                                                                                                                                                                                         |
|--------------------------------|--------------------------|-----------------------------------------------------------------------------------------------------------------------------------------------------------------------------------------------------------------------------------------------------------------------------------------------------------------------------------------------------------------------------------------------------------------------------------------------------------------------------------------------------------------------------------------------------------------------------------------------------------------------------------------------------------------------------------------------------------------------------------------------------------------------------------------------------------------------------------------------------------------------------------------|
| Yi<br>(East Asia)              | Yes <sup>(SCCS)</sup>    | <i>“Whether in a forest or thicket, whether beside the mountain stream or in wild fields, a young Lolo male and female could make love to each other”</i> (Lin and Pan, 1947, p. 64)                                                                                                                                                                                                                                                                                                                                                                                                                                                                                                                                                                                                                                                                                                    |
| Chukchee<br>(North Asia)       | Yes <sup>?(SCCS)</sup>   | (Bogoraz-Tan, 1909, pp. 602; 607)                                                                                                                                                                                                                                                                                                                                                                                                                                                                                                                                                                                                                                                                                                                                                                                                                                                       |
| Nivkh (Gilyak)<br>(North Asia) | Yes <sup>(SCCS)</sup>    | <i>“Likewise a public display of sexual intimacy is not allowed. No one permits himself to lie down under one covering with his group an'gej in the common yurt, even with a preliminary agreement. Moreover, even between individual spouses openness of sexual relations is not allowed. Intercourse may not take place publicly or before the eyes of the individual spouse concerned. If the act takes place at night in the yurt where there are also strangers sleeping, then each one lies down separately, and only when all have gone to sleep does the man or woman [...] move over to the bed of his group spouse, who may accept or reject the attentions if there has not been any preliminary agreement [...] In the winter, in the yurt: in the daytime, in the absence of strangers; at night, after all have gone to sleep”</i> (Shternberg et al., 1933, pp. 252–253) |
| Samoyed<br>(North Asia)        | Yes <sup>?(survey)</sup> | (Bénard and Messner, 1921, p. 5)                                                                                                                                                                                                                                                                                                                                                                                                                                                                                                                                                                                                                                                                                                                                                                                                                                                        |
| Yakut<br>(North Asia)          | Yes <sup>(survey)</sup>  | <i>“Lovers used to come to their girls mostly at the time when everybody else had just fallen asleep and when sleeping is generally at its soundest”</i> (Popov, 1946, p. 18)                                                                                                                                                                                                                                                                                                                                                                                                                                                                                                                                                                                                                                                                                                           |
| Badaga<br>(South Asia)         | Yes <sup>(survey)</sup>  | <i>“If sharing the bed with children a couple will have intercourse while lying on their sides so as to be less visible and turbulent. Yet in practice anyone who wants to watch his relatives in coitus has simply to pretend to be asleep”</i> (Hockings, 1980, p. 47)                                                                                                                                                                                                                                                                                                                                                                                                                                                                                                                                                                                                                |
| Bengali<br>(South Asia)        | Yes <sup>(survey)</sup>  | <i>“They never discuss the sexual act with each other, because no one is supposed to talk about such things, even husband and wife... She is expected to be modest above all other considerations”</i> (Roy, 1975, p. 98)                                                                                                                                                                                                                                                                                                                                                                                                                                                                                                                                                                                                                                                               |
| Khasi<br>(South Asia)          | Yes <sup>(survey)</sup>  | Pairs move to a separate dwelling to “enjoy matrimonial privacy” (Nakane, 1967, p. 66)                                                                                                                                                                                                                                                                                                                                                                                                                                                                                                                                                                                                                                                                                                                                                                                                  |
| Gond<br>(South Asia)           | Yes <sup>(SCCS)</sup>    | <i>“The dancing and singing, it need hardly be said, lead on frequently to love-making, couples retiring into the darkness”</i> (Grigson & Elwin, 1949, p. 186) (Elwin, 1947)                                                                                                                                                                                                                                                                                                                                                                                                                                                                                                                                                                                                                                                                                                           |
| Santal<br>(South Asia)         | Yes <sup>(SCCS)</sup>    | <i>“If a Santal avoids the above partners, he is free to ‘take whatever girl he wills’. But even here his conduct is hedged with certain rules. He must always, for example, observe the strictest privacy”</i> (Archer, 1974, p. 88)<br><br><i>“Moreover the value of sex lies in its intimacy and there is no clearer index to Santal sensibility than in the value which the tribe acts on public reticence. In the privacy of night or in the secret meetings of</i>                                                                                                                                                                                                                                                                                                                                                                                                                |

|                                   |                          |                                                                                                                                                                                                                                                                                                                                                                                                                                                                                                                                     |
|-----------------------------------|--------------------------|-------------------------------------------------------------------------------------------------------------------------------------------------------------------------------------------------------------------------------------------------------------------------------------------------------------------------------------------------------------------------------------------------------------------------------------------------------------------------------------------------------------------------------------|
|                                   |                          | <p><i>lovers the sexual technique of Santals is as developed as that of the Pardhans” (Archer, 1984, p. 507)</i></p> <p><i>“It follows that sexual intercourse itself must never be in public [...] The same principles apply to attempts and preparations” (Archer, 1984, pp. 509–510)</i></p> <p><i>“These accessories to the sexual act almost cease with child-birth and coitus is indulged in as the first thing on bed, “for fear of children rising from their sleep and disturbing them”” (Mukherjea, 1962, p. 434)</i></p> |
| Telugu<br>(South Asia)            | Yes? <sup>(EA)</sup>     | (Dube, 1955, pp. 183; 195; Tapper, 1987, p. 138)                                                                                                                                                                                                                                                                                                                                                                                                                                                                                    |
| Uttar Pradesh<br>(South Asia)     | Yes? <sup>(survey)</sup> | (Wiser and Wiser, 1930, p. 94)                                                                                                                                                                                                                                                                                                                                                                                                                                                                                                      |
| Alorese<br>(Southeast Asia)       | Yes <sup>(SCCS)</sup>    | <i>“Probably one of the most acute sources of shame in relation to sex is public intercourse” (Du Bois et al., 1944, pp. 98; 103)</i>                                                                                                                                                                                                                                                                                                                                                                                               |
| Balinese<br>(Southeast Asia)      | Yes <sup>(SCCS)</sup>    | <i>“The Balinese are extremely discreet in their intimate relations; lovers are never seen together in public” (Covarrubias, 1938, p. 137)</i>                                                                                                                                                                                                                                                                                                                                                                                      |
| Cambodians<br>(Southeast Asia)    | Yes <sup>(survey)</sup>  | <i>“Actual intercourse is evidently executed very quickly and quietly” (Ebihara, 1971, p. 491)</i>                                                                                                                                                                                                                                                                                                                                                                                                                                  |
| Ifugao<br>(Southeast Asia)        | Yes? <sup>(SCCS)</sup>   | (Barton, 1938, pp. 55; 98; 229; Lambrecht, 1941, p. 172)                                                                                                                                                                                                                                                                                                                                                                                                                                                                            |
| Javanese<br>(Southeast Asia)      | Yes <sup>(SCCS)</sup>    | <i>“The facts of sexual intercourse seem to be successfully hidden, at least from the conscious awareness of children, in spite of the fact that it seems to be carried on in the same bed, or at least the same room, as the children” (Geertz, 1961, p. 103)</i>                                                                                                                                                                                                                                                                  |
| Rungus Dusun<br>(Southeast Asia)  | Yes <sup>(survey)</sup>  | <p><i>“Mongoliduk means “to peek at”, “to watch secretly” in a sexual context. For example, it refers to a person taking a furtive look at someone’s genitals or secretly watching sexual relations, for which the offender can be sued” (Appell, 1991, p. 62)</i></p> <p><i>“This story appears contradictory to Rungus cultural values as sexual intercourse is a very private act and must not be observed, particularly by close relatives for it puts them in ritual jeopardy” (Appell, 1991, p. 80)</i></p>                   |
| Semang<br>(Southeast Asia)        | Yes <sup>(SCCS)</sup>    | <i>“The Semang cohabit in the camp at night. It is said to be improper during the day because others would notice” (Schebesta and Schütze, 1954, p. 247)</i>                                                                                                                                                                                                                                                                                                                                                                        |
| <b>Europe</b>                     |                          |                                                                                                                                                                                                                                                                                                                                                                                                                                                                                                                                     |
| Highland Scots<br>(British Isles) | Yes? <sup>(survey)</sup> | (Walker, 1984, pp. 75; 78)                                                                                                                                                                                                                                                                                                                                                                                                                                                                                                          |

|                                          |                         |                                                                                                                                                                                                                                                                                                                                                                                                                                                                                                                                                                                                                                                                                                                                                                                                                                                                                                                                                                                                                                                                                                                                                                                                                                                                                              |
|------------------------------------------|-------------------------|----------------------------------------------------------------------------------------------------------------------------------------------------------------------------------------------------------------------------------------------------------------------------------------------------------------------------------------------------------------------------------------------------------------------------------------------------------------------------------------------------------------------------------------------------------------------------------------------------------------------------------------------------------------------------------------------------------------------------------------------------------------------------------------------------------------------------------------------------------------------------------------------------------------------------------------------------------------------------------------------------------------------------------------------------------------------------------------------------------------------------------------------------------------------------------------------------------------------------------------------------------------------------------------------|
| Rural Irish<br>(British Isles)           | Yes <sup>(SCCS)</sup>   | Extreme modesty; for instance, wives walk several steps behind their husbands (Arensberg and Kimball, 1940, p. 202)                                                                                                                                                                                                                                                                                                                                                                                                                                                                                                                                                                                                                                                                                                                                                                                                                                                                                                                                                                                                                                                                                                                                                                          |
| Saami<br>(Scandinavia)                   | Yes <sup>(survey)</sup> | Parents sleep in the storage room to allow their daughter sexual privacy (Pelto, 1962, p. 147)                                                                                                                                                                                                                                                                                                                                                                                                                                                                                                                                                                                                                                                                                                                                                                                                                                                                                                                                                                                                                                                                                                                                                                                               |
| Albanians<br>(Southeastern Europe)       | Yes? <sup>(SCCS)</sup>  | Wedding guests wait outside the room where the marriages are consummated (Durham, 1928, p. 199)                                                                                                                                                                                                                                                                                                                                                                                                                                                                                                                                                                                                                                                                                                                                                                                                                                                                                                                                                                                                                                                                                                                                                                                              |
| Bosnian Muslims<br>(Southeastern Europe) | Yes <sup>(survey)</sup> | <i>“Husband and wife relations vary within the village, but in general, public display of affection is rare”</i> (Lockwood, 1983, p. 16)                                                                                                                                                                                                                                                                                                                                                                                                                                                                                                                                                                                                                                                                                                                                                                                                                                                                                                                                                                                                                                                                                                                                                     |
| Croats<br>(Southeastern Europe)          | Yes <sup>(survey)</sup> | <i>“A husband and wife could only show affection, therefore, in the privacy of their own room”</i> (Gilliland, 1986, p. 101)                                                                                                                                                                                                                                                                                                                                                                                                                                                                                                                                                                                                                                                                                                                                                                                                                                                                                                                                                                                                                                                                                                                                                                 |
|                                          |                         | <i>“The quality required of women in relation to honour is shame, particularly sexual shame. Subjectively the woman's sexual shame is not simply a fear of external sanctions; it is an instinctive revulsion from sexual activity, an attempt in dress, movement, and attitude, to disguise the fact that she possesses the physical attributes of her sex. Maidens must be virgins, and even married women must remain virginal in thought and expression”</i> (Campbell, 1970, p. 146)                                                                                                                                                                                                                                                                                                                                                                                                                                                                                                                                                                                                                                                                                                                                                                                                    |
|                                          |                         | <i>“Even in marriage sexual activity is something ‘out of alignment’ (anapodo). In some way it pollutes. After sleeping with his wife a shepherd ought to wash his hands before milking a ewe, a sacred animal. Intercourse must occur in darkness, without speech, and the woman must remain motionless and passiv”</i> (Campbell, 1970, p. 155)                                                                                                                                                                                                                                                                                                                                                                                                                                                                                                                                                                                                                                                                                                                                                                                                                                                                                                                                            |
| Greeks<br>(Southeastern Europe)          | Yes <sup>(survey)</sup> | <i>“He may continue to sleep with his bride in privacy for one or two months but if he prolongs this period unduly it represents a clear breach in the solidarity of the family. Sexual intercourse becomes now progressively associated not with the proof of manliness, but with conjugal intimacy and solidarity. And in his attempt to maintain his relations with his family of origin unaltered and intact he uses great care to avoid any demonstration of this kind of interest in his bride. Sarakatsan sleeping arrangements are simple. Velenzas, thick woollen carpet-like blankets, are spread on the ground. The Sarakatsanos removes his shoes and his jacket, and another velenza is placed over him. It is the duty of the young bride to place the heavy enveloping velenzas over each member of the family in turn and then to put out the oil lamp before making her way to her husband's side. It is not generally very long before a concert of snores indicates that the family is asleep and it is then possible for the bride and groom under their heavy covering to exchange silent embraces. Silence, of course, is necessary to avoid discovery but in any case the Sarakatsani believe that speech during intercourse is shameful”</i> (Campbell, 1964, p. 67) |

|                                                                                         |                          |                                                                                                                                                                                                        |
|-----------------------------------------------------------------------------------------|--------------------------|--------------------------------------------------------------------------------------------------------------------------------------------------------------------------------------------------------|
| <i>“One never even speaks of the sexual life”</i> (Kavvadias and Schütze, 1965, p. 157) |                          |                                                                                                                                                                                                        |
| Serbs<br>(Southeastern Europe)                                                          | Yes? <sup>(survey)</sup> | (Erich 1966, p. 146)                                                                                                                                                                                   |
| Basques<br>(Southern Europe)                                                            | Yes <sup>(survey)</sup>  | Sexual matters are poorly discussed, even between the married couple (Del Valle et al., 1985, pp. 210–213)                                                                                             |
| <b>Middle America and the Caribbean</b>                                                 |                          |                                                                                                                                                                                                        |
| Haitians<br>(Caribbean)                                                                 | Yes? <sup>(SCCS)</sup>   | (Herskovits, 1937, pp. 102–103; Simpson, 1942, p. 669)                                                                                                                                                 |
| Puerto Ricans<br>(Island) (Caribbean)                                                   | Yes <sup>(survey)</sup>  | <i>“Parents carefully guard their own sex relations from their children”</i> (Wolf, 1972)                                                                                                              |
| Kuna<br>(Central America)                                                               | Yes <sup>(SCCS)</sup>    | <i>“That everything concerning sex is to be treated with the utmost secrecy, is very strictly upheld among the Cunas”</i> (Nordenskiöld et al., 1938, p. 371)                                          |
| Talamancans<br>(Central America)                                                        | Yes <sup>(SCCS)</sup>    | <i>“I must do these people the justice of saying that they are remarkably modest”</i> (Gabb, 1876, p. 518)                                                                                             |
| Nahua<br>(Central Mexico)                                                               | Yes <sup>(survey)</sup>  | Parents have intercourse at night (Lewis, 1951, p. 291)                                                                                                                                                |
| Zapotec<br>(Central Mexico)                                                             | Yes <sup>(survey)</sup>  | Parents have intercourse in the storage room to avoid being seen by their children (Taylor, 1979, p. 185)                                                                                              |
| Maya<br>(Maya area)                                                                     | Yes <sup>(survey)</sup>  | Parents wait until the children are asleep (Elmendorf, 1976, p. 66)                                                                                                                                    |
| Mam Maya<br>(Maya area)                                                                 | Yes <sup>(EA)</sup>      | Pairs postpone the consummation of marriage <i>“because the noise would awaken her father and the young husband would be ashamed”</i> (Wagley, 1949, p. 40)                                            |
| Tzeltal<br>(Maya area)                                                                  | Yes <sup>(survey)</sup>  | <i>“All legal sexual relations are carried out in the relative privacy of the house”</i> (Nash, 1970, p. 203)                                                                                          |
| Huichol<br>(Northern Mexico)                                                            | Yes <sup>(survey)</sup>  | <i>“Sex is very much a private concern and relations between men and women, married or unmarried, are never carried on within view or earshot of others, especially children”</i> (Furst, 1967, p. 62) |
| Tarahumara<br>(Northern Mexico)                                                         | Yes <sup>(survey)</sup>  | <i>“Even in marriage the women are still careful about exposing themselves before their husbands. During sexual intercourse wives do not remove their clothes”</i> (Fried, 1951, p. 148)               |
| <b>Middle East</b>                                                                      |                          |                                                                                                                                                                                                        |
| Bedouins<br>(Middle East)                                                               | Yes? <sup>(survey)</sup> | Marriages are consummated inside a closed tent/ house (Dickson, 1951, p. 205)                                                                                                                          |



|                                                           |                          |                                                                                                                                                                                                                                                                                                                                                                                                                                                                                                                                                                                                              |
|-----------------------------------------------------------|--------------------------|--------------------------------------------------------------------------------------------------------------------------------------------------------------------------------------------------------------------------------------------------------------------------------------------------------------------------------------------------------------------------------------------------------------------------------------------------------------------------------------------------------------------------------------------------------------------------------------------------------------|
| Basseri<br>(Middle East)                                  | Yes? <sup>(SCCS)</sup>   | Marriages are consummated inside a closed tent when the couple is alone (Barth, 1961, pp. 141–142)                                                                                                                                                                                                                                                                                                                                                                                                                                                                                                           |
| Iran<br>(Middle East)                                     | Yes <sup>(survey)</sup>  | <i>“Even married couples should not display affection to each other or otherwise acknowledge their sexual relationship in front of others”</i> (Hegland, 2004, p. 524)                                                                                                                                                                                                                                                                                                                                                                                                                                       |
| Kurds<br>(Middle East)                                    | Yes <sup>(SCCS)</sup>    | <i>“To sleep was a family affair (unless a married couple withdrew to one of the other rooms)”</i> (Hansen, 1961, p. 37).<br><br><i>“Nor should a couple occupy one with a male relative, an uncle or a brother. As a general rule, it might be stated that a woman never sleeps in the same room with any man other than her father, her brothers, her husband, and her sons. On the other hand, there seems to be little effort made to conceal sexual intercourse from the children, who, however, are either too sleepy or too well aware of it to find it of much interest”</i> (Masters, 1953, p. 126) |
| Lur<br>(Middle East)                                      | Yes <sup>(survey)</sup>  | <i>“My husband and I always slept separate—I here, he over there. We would have been ashamed if our children noticed us do it”</i> (Friedl, 1997, p. 29)                                                                                                                                                                                                                                                                                                                                                                                                                                                     |
| Israelis<br>(Orthodox Jews:<br>Hassidim)<br>(Middle East) | Yes <sup>(survey)</sup>  | Sex should not be carried in front of other people including children who learned to speak (Rockman, 1993, p. 265)                                                                                                                                                                                                                                                                                                                                                                                                                                                                                           |
| Palestinians<br>(Middle East)                             | Yes? <sup>(survey)</sup> | (Granqvist, 1947)                                                                                                                                                                                                                                                                                                                                                                                                                                                                                                                                                                                            |
| Rwala Bedouin<br>(Middle East)                            | Yes? (SCCS)              | (Musil, 1928)                                                                                                                                                                                                                                                                                                                                                                                                                                                                                                                                                                                                |
| Turks<br>(Middle East)                                    | Yes <sup>(SCCS)</sup>    | <i>“Sex and anything to do with it is taboo in many social contexts, and this flavour of impropriety, as in many western contexts, makes straightforward information difficult to obtain”</i> (Stirling, 1965, p. 99)                                                                                                                                                                                                                                                                                                                                                                                        |
| <b>North America</b>                                      |                          |                                                                                                                                                                                                                                                                                                                                                                                                                                                                                                                                                                                                              |
| Aleut<br>(Arctic and Subarctic)                           | Yes <sup>(SCCS)</sup>    | Couples are ashamed to caress each other in public (Innokentii et al., 1840a, p. 116)                                                                                                                                                                                                                                                                                                                                                                                                                                                                                                                        |
| Kaska<br>(Arctic and Subarctic)                           | Yes <sup>(SCCS)</sup>    | <i>“In summer unmarried couples copulated in daylight or at night, but always in the privacy of the bush. A husband and wife waited until after nightfall and the sex act between them always occurred in the dwelling”</i> Voyeurs were scolded (Honigmann, 1954, pp. 126–130)                                                                                                                                                                                                                                                                                                                              |
| Ingalik<br>(Arctic and Subarctic)                         | Yes <sup>(SCCS)</sup>    | <i>“Man and woman are seldom isolated from a social group for other than sexual reasons”</i> (Osgood, 1958, p. 206)                                                                                                                                                                                                                                                                                                                                                                                                                                                                                          |
| Iroquois<br>(Eastern Woodlands)                           | Yes <sup>(survey)</sup>  | <i>“Normally the Iroquoian peoples were modest in dress, often rather shy in public contacts with the opposite sex...chastity and marital fidelity were publicly recognized ideals”</i> (Wallace and Steen, 1969, p. 63)                                                                                                                                                                                                                                                                                                                                                                                     |



|                                                     |                          |                                                                                                                                                                                                                                                                                                                                                                                                          |
|-----------------------------------------------------|--------------------------|----------------------------------------------------------------------------------------------------------------------------------------------------------------------------------------------------------------------------------------------------------------------------------------------------------------------------------------------------------------------------------------------------------|
| Mi'kmaq<br>(Eastern Woodlands)                      | Yes <sup>(SCCS)</sup>    | <i>“But even the most trifling; no kissing, no badinage between young persons of different sexes; in a word, everything is said and is done in their wigwams with much modesty and reserve” (Clerc and Ganong, 1910, p. 250)</i>                                                                                                                                                                         |
| Pomo<br>(Northwest Coast and California)            | Yes? <sup>(SCCS)</sup>   | (Loeb, 1926, p. 334)                                                                                                                                                                                                                                                                                                                                                                                     |
| African Americans<br>(Regional and Ethnic Cultures) | Yes <sup>(survey)</sup>  | <i>“They gathered in the bayou, a boy and girl would slip off from the group into the woods” (Davis and Dollard, 1958, p. 273)</i>                                                                                                                                                                                                                                                                       |
| Amish<br>(Regional and Ethnic Cultures)             | Yes <sup>(survey)</sup>  | <i>“The subject of sex in Amish life is regarded as a purely personal matter. Adults purposely ignore any mention of the subject, especially in the presence of children” (Hostetler, 1980, p. 162)</i>                                                                                                                                                                                                  |
| Arab Canadians<br>(Regional and Ethnic Cultures)    | Yes? <sup>(survey)</sup> | (Abu-Laban, 1980, pp. 169–170; Jabbra, 1991, p. 45; Skoggard, 1999, p. 7)                                                                                                                                                                                                                                                                                                                                |
| Eastern Apache<br>(Southwest and Basin)             | Yes <sup>(SCCS)</sup>    | <i>“The parents are very careful to urinate and to have sexual intercourse in private and to speak carefully” (Opler, 1941, p. 77)</i>                                                                                                                                                                                                                                                                   |
| Havasupai<br>(Southwest and Basin)                  | Yes <sup>(SCCS)</sup>    | <i>“Married couples, and couples, married or unmarried, who are engaged in a secret affair, do not show interest in one another in any public situation” (Smithson, 1959, pp. 77–78)</i>                                                                                                                                                                                                                 |
| Hopi<br>(Southwest and Basin)                       | Yes <sup>(survey)</sup>  | <i>“Social dancing is not a Hopi custom, nor does embracing in public or any public exhibition of intimacy ever occur” (Dennis, 1940, p. 43)</i>                                                                                                                                                                                                                                                         |
|                                                     |                          | <i>“It is quite likely that the constant presence of other adults in the house and the lack of privacy prevented spouses from developing intimacy. All people of the house slept in one room, and the couple wishing to have sexual relations had to wait until others were asleep and then conduct themselves with a minimum of noise” (Schlegel, 1988, p. 52)</i>                                      |
|                                                     |                          | <i>“Night is the best time, for during the day Hopis are apt to walk in without knocking. My own mother walked in on Irene and me once, and when I showed embarrassment she said, “Never mind me, that's the way the world goes”” (Talayesva and Simmons, 1942, p. 283)</i>                                                                                                                              |
| Mormons<br>(Southwest and Basin)                    | Yes <sup>(survey)</sup>  | <i>“He tries to avoid showing affection to any wife in the presence of others, to avoid feelings of jealousy [...] Seymour told a story about a man who slept with several wives in the same bed and had sexual relations with one in the presence of others. For this, and probably other reasons, there was a great deal of conflict and upheaval in this family” (Altman and Ginat, 1996, p. 353)</i> |

|                                                               |                          |                                                                                                                                                                                                                                                                                                                                                                                                                                                                                                              |
|---------------------------------------------------------------|--------------------------|--------------------------------------------------------------------------------------------------------------------------------------------------------------------------------------------------------------------------------------------------------------------------------------------------------------------------------------------------------------------------------------------------------------------------------------------------------------------------------------------------------------|
|                                                               |                          | <p><i>“If cohabitation takes place in the hogan, it also is done quietly and surreptitiously. A woman lifts her dress. A man takes off his g-string. Exposure of the human body is rare. Exposure of the human genitalia is shameful and embarrassing”</i> (Dyk, 1951, p. 108)</p>                                                                                                                                                                                                                           |
| Navajo<br>(Southwest and Basin)                               | Yes <sup>(EA)</sup>      | <p><i>“White persons who are told of the strong Navaho sensitivity with regard to bodily exposure wonder how privacy can possibly be maintained under hogan conditions. There are several answers. Navahos do not undress when they go to sleep. Sex relations take place during the hours of darkness”</i> (Kluckhohn and Leighton, 1946, p. 47)</p> <p><i>“Intercourse seldom takes place except under cover of darkness and with very little disrobing”</i> (Leighton and Kluckhohn, 1947, pp. 87–88)</p> |
| <hr/> <p style="text-align: center;"><b>Oceania</b></p> <hr/> |                          |                                                                                                                                                                                                                                                                                                                                                                                                                                                                                                              |
| Kapauku<br>(Melanesia)                                        | Yes <sup>(SCCS)</sup>    | Sex is carried out during day time and in the bush (Pospisil, 1958, p. 136)                                                                                                                                                                                                                                                                                                                                                                                                                                  |
| Kwoma<br>(Melanesia)                                          | Yes <sup>(SCCS)</sup>    | Sex is initiated by discreet communication (Whiting, 1941, p. 127)                                                                                                                                                                                                                                                                                                                                                                                                                                           |
| Lesu<br>(Melanesia)                                           | Yes <sup>(SCCS)</sup>    | Pairs have intercourse indoors or outdoors according to the presence of people (Powdermaker, 1933, pp. 278–283)                                                                                                                                                                                                                                                                                                                                                                                              |
| Malekula<br>(Melanesia)                                       | Yes <sup>(survey)</sup>  | Children are sent away to achieve sexual privacy (Deacon and Wedgwood, 1934, pp. 41; 154–155)                                                                                                                                                                                                                                                                                                                                                                                                                |
| Manus<br>(Melanesia)                                          | Yes <sup>(SCCS)</sup>    | Sexual issues are a source of shame and are not discussed (Mead, 1930, pp. 164; 167)                                                                                                                                                                                                                                                                                                                                                                                                                         |
| Northeastern Massim<br>(Muyuw)<br>(Melanesia)                 | Yes <sup>(survey)</sup>  | Pairs have intercourse in the bush away from their garden (Damon, 1990, p. 127)                                                                                                                                                                                                                                                                                                                                                                                                                              |
| Orokaiva<br>(Melanesia)                                       | Yes <sup>(survey)</sup>  | Pairs have intercourse within enclosed private gardens (Schwimmer, 1973, p. 89)                                                                                                                                                                                                                                                                                                                                                                                                                              |
| Sa<br>(Melanesia)                                             | Yes? <sup>(survey)</sup> | <i>“We have never observed other than momentary unavoidable physical contacts between men and women, whether married or not”</i> (Lane and Lane, 1957, p. 46)                                                                                                                                                                                                                                                                                                                                                |

|                             |                         |                                                                                                                                                                                                                                                                                                                                                                                                                                                                                                                                                                                                                    |
|-----------------------------|-------------------------|--------------------------------------------------------------------------------------------------------------------------------------------------------------------------------------------------------------------------------------------------------------------------------------------------------------------------------------------------------------------------------------------------------------------------------------------------------------------------------------------------------------------------------------------------------------------------------------------------------------------|
| Siwai<br>(Melanesia)        | Yes <sup>(SCCS)</sup>   | Pairs do not discuss sexual matters and become more discreet as their children grow older (Oliver, 1955, pp. 141–143; 261)                                                                                                                                                                                                                                                                                                                                                                                                                                                                                         |
| Tinputz<br>(Melanesia)      | Yes <sup>(survey)</sup> | Pairs sneak away to have intercourse in the bush or wait until others are asleep (Blackwood, 1935, pp. 120–127)                                                                                                                                                                                                                                                                                                                                                                                                                                                                                                    |
| Trobriand<br>(Melanesia)    | Yes <sup>(SCCS)</sup>   | <i>“Sex is regarded as naturally to be avoided in public and open conversation, and always to be concealed from others in behaviour”</i> (Malinowski, 1929, p. 397)                                                                                                                                                                                                                                                                                                                                                                                                                                                |
| Wogeo<br>(Melanesia)        | Yes <sup>(EA)</sup>     | Elders make opportunities for pairs who have no private dwelling to sneak to the forest during mid-day work (Hogbin, 1946, p. 186, 1945, p. 341)                                                                                                                                                                                                                                                                                                                                                                                                                                                                   |
| Belau<br>(Micronesia)       | Yes? <sup>(SCCS)</sup>  | (Barnett, 1949, p. 114; Force and Force, 1972, p. 25; Smith, 1983, pp. 137–138)                                                                                                                                                                                                                                                                                                                                                                                                                                                                                                                                    |
| Chuuk<br>(Micronesia)       | Yes <sup>(SCCS)</sup>   | <i>“There is obviously far less direct stimulation of the clitoris in this position and it is recognized that orgasm is less likely to be reached by the woman. However, it is more discreet and less likely to attract attention in a house full of people; for this reason even married couples often prefer it lest they disturb someone else and cause embarrassment to all concerned”</i> (Gladwin and Sarason, 1953, p. 110)<br><br><i>“There is, however, a sense of modesty about sex and genital exposure which requires that intercourse be carried on in strict privacy”</i> (Goodenough, 1949, p. 615) |
| Marshallese<br>(Micronesia) | Yes <sup>(SCCS)</sup>   | <i>“Immoral acts are not committed openly, only in secret”</i> (Erdland and Neuse, 1914, p. 107)                                                                                                                                                                                                                                                                                                                                                                                                                                                                                                                   |
| Hawaiians<br>(Polynesia)    | Yes <sup>(EA)</sup>     | <i>“Old time Hawaiians never “made love” in public, or even in the presence of relatives or friends”</i> (Buck, 1957; Handy and Pukui, 1972, p. 171)                                                                                                                                                                                                                                                                                                                                                                                                                                                               |
| Lau Fijian<br>(Polynesia)   | Yes <sup>(EA)</sup>     | <i>“Married people have connection in the sleeping house or in the bush”</i> (Thompson, 1940a, p. 50)                                                                                                                                                                                                                                                                                                                                                                                                                                                                                                              |
| Maori<br>(Polynesia)        | Yes? <sup>(SCCS)</sup>  | (Buck, 1952, p. 365)                                                                                                                                                                                                                                                                                                                                                                                                                                                                                                                                                                                               |
| Marquesas<br>(Polynesia)    | Yes <sup>(survey)</sup> | <i>“There are no data on the patterns of public courtship followed in the aboriginal period, but it appears that the present coyness and restraint exhibited in the presence of others was probably also an aboriginal trait [...] public intercourse, sanctioned on some occasions in the past, is no longer practiced”</i> (Suggs, 1963, p. 76)                                                                                                                                                                                                                                                                  |
| Samoans<br>(Polynesia)      | Yes <sup>(EA)</sup>     | <i>“All expressions of affection are rigorously barred in public. [...] So no Samoan child is accustomed to seeing father and mother exchange casual caresses”</i> (Mead, 1928, p. 135)                                                                                                                                                                                                                                                                                                                                                                                                                            |
| Tongans<br>(Polynesia)      | Yes <sup>(survey)</sup> | <i>“Because sex is a tapu subject in public”</i> (Bloomfield, 2002, p. 105)                                                                                                                                                                                                                                                                                                                                                                                                                                                                                                                                        |

| South America                                 |                          |                                                                                                                                                                                                                                                                                                              |
|-----------------------------------------------|--------------------------|--------------------------------------------------------------------------------------------------------------------------------------------------------------------------------------------------------------------------------------------------------------------------------------------------------------|
| Barama River<br>Carib<br>(Amazon and Orinoco) | Yes <sup>(SCCS)</sup>    | <i>“Men have usually arranged trysts with girls or women... these couples slip off to their rendezvous, leaving the remainder of the party”</i> (Gillin, 1936, p. 65)                                                                                                                                        |
| Jivaro<br>(Amazon and Orinoco)                | Yes <sup>(SCCS)</sup>    | <i>“The Jibaros especially are very decent in sexual matters. They do not consider it proper to discuss such questions publicly, and obscene gestures or language”</i> (Karsten, 1935, p. 216)                                                                                                               |
| Mundurucu<br>(Amazon and Orinoco)             | Yes <sup>(SCCS)</sup>    | <i>“The sorties to the forest thus give the couple minimal privacy”</i> (Murphy and Murphy, 1985, pp. 177–178).                                                                                                                                                                                              |
| Nambicuara<br>(Amazon and Orinoco)            | Yes <sup>(SCCS)</sup>    | <i>“Sexual relations usually take place at night, and often not far from the fires of the camp. More often the couple draws back about a hundred meters into the neighboring bush”</i> (Lévi-Strauss and Sittler, 1948, p. 73).                                                                              |
| Shipibo<br>(Amazon and Orinoco)               | Yes? <sup>(survey)</sup> | (Behrens, 1988, p. 74)                                                                                                                                                                                                                                                                                       |
| Sirionó<br>(Amazon and Orinoco)               | Yes <sup>(SCCS)</sup>    | <i>“Since privacy is almost impossible to obtain within the hut [...] more intercourse takes place in the bush than in the house”</i> (Holmberg, 1950, pp. 63–64)                                                                                                                                            |
| Trumai<br>(Amazon and Orinoco)                | Yes <sup>(SCCS)</sup>    | <i>“Between married people, sex occurs at night — preferably when everyone else is asleep — or while going to the forest on various gathering tasks”</i> (Murphy and Quain, 1955, p. 105)                                                                                                                    |
| Yanoama<br>(Amazon and Orinoco)               | Yes <sup>(SCCS)</sup>    | <i>“Clandestine sexual liasons usually take place at this time of day, having been arranged on the previous evening. The lovers leave the village on the pretext of going to the bathroom and meet at some predetermined location. They return to the village by opposite routes”</i> (Chagnon, 1968, p. 89) |
| Mapuche<br>(Central Andes)                    | Yes? <sup>(SCCS)</sup>   | <i>“Some care is taken to achieve privacy, but little shame or guilt attends discovery, except in cases of adultery”</i> (Latham, 1909, p. 95) (Faron, 1961, pp. 157–158)                                                                                                                                    |
| Bororo<br>(Eastern)                           | Yes? <sup>(EA)</sup>     | (Baldus and Lillios, 1937, p. 30, but see also p. 18)                                                                                                                                                                                                                                                        |

|                                         |                                    |                                                                                                                                                                                                                                                                                                                                                                                                                                                                               |
|-----------------------------------------|------------------------------------|-------------------------------------------------------------------------------------------------------------------------------------------------------------------------------------------------------------------------------------------------------------------------------------------------------------------------------------------------------------------------------------------------------------------------------------------------------------------------------|
| Canela<br>(Timbira)<br>(Eastern)        | Yes <sup>(SCCS)</sup>              | <i>“A youth visits his betrothed in her platform bed, which she hurriedly elevates to a level directly below the roof, and shields from the sight of the other inmates by a partition of mats. However, nobody casts prying eyes in their direction, for in this regard the Timbira display exemplary discretion and considerateness even if personally interested in the relationship of the young people”</i> (Nimuendaju and Lowie, 1946, p. 118) (but see Crocker, 1990). |
| Tupinamba<br>(Eastern)                  | Yes <sup>(SCCS)</sup>              | <i>“The men and women behave themselves decently and do their business secretly”</i> (Staden, 1928, p. 147 (3))                                                                                                                                                                                                                                                                                                                                                               |
| Warao<br>(Eastern)                      | Yes? <sup>(SCCS)</sup>             | (Heinen, 1973, pp. 43; 476; 600; Turrado Moreno and Muirden, 1945, pp. 212; 271)                                                                                                                                                                                                                                                                                                                                                                                              |
| Xokleng<br>(Aweikoma)<br>(Eastern)      | Yes? <sup>(SCCS)</sup>             | (Henry et al., 1941, p. 17)                                                                                                                                                                                                                                                                                                                                                                                                                                                   |
| Goajiro<br>(North-Western)              | (traditional) No <sup>(SCCS)</sup> | <i>“Conjugal relations of a couple who are pure Indian are carried out openly without precautions against the presence of outsiders — either at home or in the fields — even in front of the smaller children, who from a tender age are accustomed to see calmly these biological acts”</i> (Bolinder, 1957; Gutiérrez de Pineda and Muirden, 1950, p. 133).                                                                                                                 |
|                                         | (modern) Yes <sup>(SCCS)</sup>     | <i>“Exhibitionism of a sexual type is considered a punishable act”</i> (Gutiérrez de Pineda and Muirden, 1950, p. 232; Watson, 1968).                                                                                                                                                                                                                                                                                                                                         |
| Kogi<br>(North-Western)                 | Yes <sup>(EA)</sup>                | Pairs have intercourse at night and outdoors (Reichel-Dolmatoff and Muirden, 1951, pp. 219; 286)                                                                                                                                                                                                                                                                                                                                                                              |
| Abipón<br>(Southern)                    | Yes? <sup>(SCCS)</sup>             | (Dobrizhoffer, 1822, pp. 41, 138–139)                                                                                                                                                                                                                                                                                                                                                                                                                                         |
| Enxet and Enlhet (Lengua)<br>(Southern) | Yes? <sup>(survey)</sup>           | <i>“They are rarely disturbed by other community members who seem to know when a bathing area is being occupied, and it is during these periods that they engage in sexual relations. In fact, a spouse is the only person of the opposite sex to see someone's genitalia”</i> (Kidd, 1999, p. 169)                                                                                                                                                                           |
| Tehuelche<br>(Southern)                 | Yes? <sup>(SCCS)</sup>             | (De Viedma and Muirden, 1837, p. 5; Musters, 1873, p. 169)                                                                                                                                                                                                                                                                                                                                                                                                                    |

---

**Yes?** = Only indirect evidence for concealment.

<sup>(EA)</sup> = Based on resources included in the Ethnographic Atlas (eHRAF World Cultures, Gray, 1999).

<sup>(SCCS)</sup> = Based on resources included in the Standard Cross-Cultural Sample (eHRAF World Cultures, Murdock and White, 1969; White, 1989).

\* Geographical and cultural classifications follow the eHRAF World Culture.

\*\* Examples were chosen to present diversity (e.g. methods for concealment, concealment of different sensory outputs, concealment of milder interactions than sexual intercourse, etc.). Cited examples are not necessarily the strongest available evidence for concealment of sexual intercourse. See Appendix 1 for the criteria used to infer the concealment of sexual intercourse.

Examined cultures for which data was not available in the eHRAF World Cultures (n=118):

**Africa:** Bagisu; Bambara; Banyoro; Berbers of Morocco; Betsileo; Katab; Konso; Lakeshore Tonga; Lozi; Mao; Ovimbundu; Rwandans; Shilluk; Shluh; Somali; Southern Toraja; Suku; Tanala; Turkana; Yoruba

**Asia:** Ainu; Andamans; Atayal; Baluchi; Bhil; Burusho; Flores; Ghorbat; Hazara; Inner Mongolia; Kachin; Karakalpak; Karen; Kol; Koryak; Kyrgyz; Monguor; Nenets; Nicobarese, Pamir peoples; Rmeet; Tajiks; Turkmens; Uzbeks; Vedda; Vietnamese; Xinjiang Uygur Autonomous Region.

**Europe:** British (1714-1815); Early Icelanders; Icelanders; Imperial Romans; Montenegrins; Slovenes.

**Middle America and the Caribbean:** Aztec; Cuban; Dominican; Island Carib; Jamaican.

**Middle East:** Babylonia; Yemenis.

**North America:** Alutiiq; Cherokee; Chicanos; Arab Americans; Basque Americans; Cajuns; Chinese Americans; Chinese Canadians; Chinookans of the Lower Columbia River; Chipewyans; Cuban Americans; Creek; Delaware; Haida; Haitian Americans; Innu; Italian American; Italian Canadians; Klamath; Korean American; Maricopa; Natchez; North American Armenians; North American Hmong; Northern Paiute; Nuxalk (Bellacoola); Ojibwa; O'odham; Osage; Pawnee; Puerto Ricans (Mainland); Quinault; Sea Islanders; Serbian Americans; Stoney; Tubatulabal; Ute; Western Woods Cree; Yokuts; Yurok; Zia Pueblo.

**Oceania:** Aranda; Kanak; Kimam; Rapa Nui; Santa Cruz Islanders; Tiwi; Yapese.

**South America:** Bahia Brazilians; Canelos Quichua; Chachi; Ndyuka; Chorote; Otavalo Quichua; Quito Quichua; Saraguro Quichua; Saramaka; Terena.

---

**Appendix 6.** Customs and frequent occurrences of public mating in 20 cultures.

| Region                           | Sub-region*                  | Culture*                 | Custom (principal authorities)                                                                                                                                                                                                                                                                |
|----------------------------------|------------------------------|--------------------------|-----------------------------------------------------------------------------------------------------------------------------------------------------------------------------------------------------------------------------------------------------------------------------------------------|
| Africa                           | Eastern Africa               | Banyoro                  | <p><i>Ceremonial mating:</i> mediums intercourse while other mediums sing to conceal the act from the people outside (Nyakatura and Rigby, 1970, p. 60).</p> <p><i>Sex training:</i> the bride's aunt sleeps with the married couple and instructs them about sex (Roscoe, 1923, p. 272).</p> |
| Africa                           | Eastern Africa               | Gikuyu                   | <i>Ceremonial mating:</i> the rape of a woman from another tribe (Lambert, 1956, p. 53).                                                                                                                                                                                                      |
| Asia                             | Southeast Asia               | Alorese                  | <i>Social punishment:</i> public intercourse with the husband to enforce marital sex with an uncooperative wife. Not clear whether it is an irregular verdict or a custom punishment (Du Bois et al., 1944, pp. 103; 107).                                                                    |
| Middle America and the Caribbean | Northern Mexico              | Huichol                  | <i>Supervision of marital mating at the wedding night:</i> the bride's mother may stay to ensure that her daughter cooperates with her new husband (Lumholtz, 1973, p. 94).                                                                                                                   |
| Middle East                      | Middle East                  | Turks                    | <i>Supervision of marital mating at the wedding night:</i> a woman watches through the keyhole to check whether the husband is impotent (Makal et al., 1954, p. 130)                                                                                                                          |
| North America                    | Arctic and Subarctic         | Ojibwa                   | <i>Gang rape:</i> in drinking parties (this behaviour is not known from traditional Ojibwa: Shkilnyk, 1985, p. 46).                                                                                                                                                                           |
| North America                    | Eastern Woodlands            | Iroquois                 | <i>Ceremonial mating:</i> sexual dreams of sick people were realised in public and may have included sexual intercourse (John, 1994, p. 83; Wallace and Steen, 1969, p. 63)                                                                                                                   |
| North America                    | Regional and Ethnic Cultures | Puerto Ricans (Mainland) | <i>Gang rape:</i> as a means to unite gang members (Bourgois, 1996a, p. 422)                                                                                                                                                                                                                  |

|               |                    |            |                                                                                                                                                                                                                                                                         |
|---------------|--------------------|------------|-------------------------------------------------------------------------------------------------------------------------------------------------------------------------------------------------------------------------------------------------------------------------|
| Oceania       | Melanesia          | Kanak      | <i>Gang rape</i> : as a punishment for a woman (Salomon and Hamelin, 2008, pp. 34–35). Data are from modern times, but the phenomenon may be rooted in group sex among youth in former times (Leenhardt, 1979, p. 153).                                                 |
| Oceania       | Melanesia          | Malekula   | <i>Ceremonial mating</i> : group sex, during which sex is not exclusive (Deacon and Wedgwood, 1934, pp. 651–652).                                                                                                                                                       |
| Oceania       | Melanesia          | Siwai      | <i>Sexual training</i> : by observing an older sibling (Oliver, 1955, p. 149).                                                                                                                                                                                          |
| Oceania       | Melanesia          | Tinputz    | <i>Social punishment</i> : gang rape as a punishment if a woman interferes with the puberty ritual of boys (Blackwood, 1935, p. 200).                                                                                                                                   |
| Oceania       | Melanesia          | Trobriand  | <i>Social punishment</i> : women will gang rape a man from another district and as a punishment (Malinowski, 1929, pp. 272–277, reliability is questionable).                                                                                                           |
| Oceania       | Micronesia         | Belau      | <i>Sexual training</i> : young boys were permitted to stand outside the house and peep-through holes to observe mating (Smith, 1983, pp. 137–138).                                                                                                                      |
| Oceania       | Polynesia          | Marquesas  | <i>Ceremonial mating</i> : group sex, during which sex is not exclusive (Linton, 1939, pp. 172–173).                                                                                                                                                                    |
|               |                    |            | <i>Group sex</i> : group sex with “ <i>promiscuous girls</i> ” (modern behaviour which may be a relict from an institute of youth dormitory) (Suggs, 1963, p. 34).                                                                                                      |
| South America | Amazon and Orinoco | Mundurucu  | <i>Social punishment</i> : gang rape of a woman in public and as a punishment, for example for being too promiscuous. (Murphy, 1960, pp. 108–109).                                                                                                                      |
| South America | Amazon and Orinoco | Nambicuará | <i>Homosexual intimacy</i> : is “carried on much more publicly than normal relations. The couples [...] install themselves near a fire of the camp under the amused eyes of the neighbors” (Lévi-Strauss and Sittler, 1948, p. 86); but see also (Price, 1981, p. 699). |
| South America | Eastern            | Bororo     | <i>Gang rape</i> : the gang rape of girls that were not contracted for marriage for too long (Cook, 1909, p. 387).                                                                                                                                                      |



---

|                  |                   |                    |                                                                                                                                                                                                                      |
|------------------|-------------------|--------------------|----------------------------------------------------------------------------------------------------------------------------------------------------------------------------------------------------------------------|
| South<br>America | Eastern           | Canela/<br>Timbira | <i>Ceremonial mating</i> : semi-public group sex during festivals<br>(Crocker, 1990, p. 106);<br><br><i>Social punishment</i> : gang rape to educate girls for sexual<br>“generosity” (Crocker, 1990, pp. 164, 230). |
| South<br>America | North-<br>Western | Kogi               | <i>Sex training</i> : the first intercourse between husband and wife is<br>observed by the priest's assistants (Park, 1965, p. 882; Reichel-<br>Dolmatoff, 1990, pp. 17–18).                                         |

---

\*Geographical and cultural classifications follow the eHRAF World Culture

---

## Appendix 7. Overview of mating patterns in social great apes and examples from non-great ape species.

| Species                                                          | Concealed mating                                         |                                                         | Public mating                                           |                                                    | Degree of cooperation                                | Mating control                                                        | Physical interference with mating                   |
|------------------------------------------------------------------|----------------------------------------------------------|---------------------------------------------------------|---------------------------------------------------------|----------------------------------------------------|------------------------------------------------------|-----------------------------------------------------------------------|-----------------------------------------------------|
|                                                                  | Legitimate mating                                        | Non-legitimate mating                                   | Legitimate mating                                       | Non-legitimate mating                              |                                                      |                                                                       |                                                     |
| <b>Humans</b><br>( <i>Homo sapiens sapiens</i> )                 | <b>Yes</b><br>(Ford and Beach, 1951 see also appendix 2) | <b>Yes</b><br>(Ford and Beach, 1951; Friedl, 1994)      | <b>No</b><br>(Ford and Beach, 1951 see also appendix 2) | <b>No</b><br>(Ford and Beach, 1951)                | <b>High</b><br>(Hill and Hurtado, 2009)              | <b>Yes (m)</b><br>(Daly et al., 1982 see also appendix 5)             | <b>Unidirectional</b><br>(Daly et al., 1982)        |
| <b>Nonhuman Great Apes (Hominidae)</b>                           |                                                          |                                                         |                                                         |                                                    |                                                      |                                                                       |                                                     |
| Species                                                          | Concealed mating                                         |                                                         | Public mating                                           |                                                    | Degree of cooperation                                | Mating control                                                        | Physical interference with mating                   |
|                                                                  | Dominants                                                | Subordinates                                            | Dominants                                               | Subordinates                                       |                                                      |                                                                       |                                                     |
| <b>Bonobos</b><br>( <i>Pan paniscus</i> )                        | <b>Yes?</b><br>(Heidi Douglas, unpublished data)         | <b>Yes?</b><br>(Heidi Douglas, unpublished data)        | <b>Yes</b><br>(Hohmann and Fruth, 2003)                 | <b>Yes</b><br>(Hohmann and Fruth, 2003)            | <b>Intermediate</b><br>(Tokuyama and Furuichi, 2016) | <b>No (m)</b><br>(Hohmann and Fruth, 2003; Surbeck et al., 2017)      | <b>Unidirectional</b><br>(Hohmann and Fruth, 2003)  |
| <b>Chimpanzees</b><br>( <i>Pan troglodytes</i> )                 | <b>Yes</b><br>(Hobaiter and Byrne, 2012; Nishida, 1980)  | <b>Yes (also vocal)</b><br>(Townsend et al., 2008)      | <b>Yes</b><br>(Tutin and McGinnis, 1981)                | <b>Yes</b><br>(Tutin and McGinnis, 1981)           | <b>Intermediate</b><br>(Muller and Mitani, 2005)     | <b>No (m)</b><br>(Surbeck et al., 2017; Tutin and McGinnis, 1981)     | <b>Unidirectional</b><br>(Tutin and McGinnis, 1981) |
| <b>Mountain gorillas</b><br>( <i>Gorilla beringei beringei</i> ) | <b>Yes?</b><br>(Harcourt et al., 1981)                   | <b>Yes?</b><br>(Martha Robbins, personal communication) | <b>Yes</b><br>(Harcourt et al., 1981; Schaller, 1963)   | <b>Yes</b><br>(Harcourt et al., 1981; Watts, 1990) | <b>Intermediate</b><br>(Harcourt and Stewart, 1989)  | <b>No (m)</b><br>(Stoinski et al., 2009)                              | <b>Unidirectional</b><br>(Watts, 1990)              |
| <b>Old World Monkeys (Cercopithecidae)</b>                       |                                                          |                                                         |                                                         |                                                    |                                                      |                                                                       |                                                     |
| Species                                                          | Concealed mating                                         |                                                         | Public mating                                           |                                                    | Degree of cooperation                                | Mating control                                                        | Physical interference with mating                   |
|                                                                  | Dominants                                                | Subordinates                                            | Dominants                                               | Subordinates                                       |                                                      |                                                                       |                                                     |
| <b>Chacma baboons</b><br>( <i>Papio ursinus</i> )                | <b>NA</b>                                                | <b>Yes</b><br>(Baniel et al., 2019)                     | <b>Yes</b><br>(Baniel et al., 2019)                     | <b>Yes</b><br>(Baniel et al., 2019)                | <b>Intermediate</b><br>(Baniel et al., 2018)         | <b>Yes (m)</b><br>(Baniel et al., 2018)                               | <b>Unidirectional</b><br>(Baniel et al., 2018)      |
| <b>Geladas</b><br>( <i>Theropithecus gelada</i> )                | <b>Yes (vocal)</b><br>(le Roux et al., 2013)             | <b>Yes</b><br>(le Roux et al., 2013)                    | <b>Yes (vocal)</b><br>(le Roux et al., 2013)            | <b>NA</b>                                          | <b>Intermediate</b><br>(Snyder-Mackler et al., 2012) | <b>Yes (m)</b><br>(le Roux et al., 2013; Snyder-Mackler et al., 2012) | <b>Unidirectional</b><br>(le Roux et al., 2013)     |
| <b>Rhesus macaques</b><br>( <i>Macaca mulatta</i> )              | <b>NA</b><br>(Berard et al., 1994)                       | <b>Yes</b><br>(Berard et al., 1994)                     | <b>NA</b><br>(Berard et al., 1994)                      | <b>No</b><br>(Berard et al., 1994)                 | <b>NA</b><br>(Berard et al., 1994)                   | <b>No (m)</b><br>(Berard et al., 1994)                                | <b>Unidirectional</b><br>(Berard et al., 1994)      |
| <b>Tibetan macaques</b><br>( <i>Macaca thibetana</i> )           | <b>Yes?</b><br>(Zhao, 1993)                              | <b>Yes</b><br>(Zhao, 1993)                              | <b>Yes</b><br>(Zhao, 1993)                              | <b>Yes</b><br>(Zhao, 1993)                         | <b>Intermediate</b><br>(Zhao, 1996)                  | <b>No (m)</b><br>(Zhao, 1993)                                         | <b>Unidirectional</b><br>(Zhao, 1993)               |
| <b>New World Monkeys (Platyrrhini)</b>                           |                                                          |                                                         |                                                         |                                                    |                                                      |                                                                       |                                                     |
| Species                                                          | Concealed mating                                         |                                                         | Public mating                                           |                                                    | Degree of cooperation                                | Mating control                                                        | Physical interference with mating                   |
|                                                                  | Dominants                                                | Subordinates                                            | Dominants                                               | Subordinates                                       |                                                      |                                                                       |                                                     |
| <b>Black Howler Monkeys</b><br>( <i>Alouatta pigra</i> )         | <b>NA</b>                                                |                                                         | <b>Yes</b><br>(Van Belle et al., 2009)                  |                                                    | <b>Intermediate</b><br>(Van Belle et al., 2014)      | <b>Yes (m)</b><br>(Van Belle et al., 2009)                            | <b>Bi-directional</b><br>(Van Belle et al., 2009)   |
| <b>Brown-mantled tamarins</b><br>( <i>Saguinus fuscicollis</i> ) | <b>No</b><br>(Terborgh and Goldizen, 1985)               | <b>No</b><br>(Terborgh and Goldizen, 1985)              | <b>Yes</b><br>(Terborgh and Goldizen, 1985)             | <b>Yes</b><br>(Terborgh and Goldizen, 1985)        | <b>High</b><br>(Terborgh and Goldizen, 1985)         | <b>No (m)</b><br>(Goldizen, 1989; Terborgh and Goldizen, 1985)        | <b>No</b><br>(Terborgh and Goldizen, 1985)          |

|                                                                    |                                                                                |                                           |                                                                     |                                           |                                                 |                                                              |                                                   |
|--------------------------------------------------------------------|--------------------------------------------------------------------------------|-------------------------------------------|---------------------------------------------------------------------|-------------------------------------------|-------------------------------------------------|--------------------------------------------------------------|---------------------------------------------------|
| <b>Common marmosets*</b><br>( <i>Callithrix jacchus</i> )          | No published observations of mating despite it being studied for >15 years     |                                           |                                                                     |                                           | <b>High</b><br>(Digby et al., 2006)             | <b>No</b><br>(Digby et al., 2006)                            | <b>NA</b>                                         |
| <b>Pygmy marmosets*</b><br>( <i>Cebuella pygmaea</i> )             | No published observations of mating despite it being studied for several years |                                           |                                                                     |                                           | <b>High</b><br>(Soini, 1988, 1987)              | <b>Yes (m)</b><br>(Soini, 1988, 1987)                        | <b>Unidirectional</b><br>(Soini, 1988, 1987)      |
| <b>Spider monkeys</b><br>( <i>Ateles belzebuth chamek</i> )        | <b>Yes?</b><br>(Gibson, 2010)                                                  | <b>Yes</b><br>(Gibson, 2010)              | <b>Yes</b><br>(Campbell and Gibson, 2008)                           | <b>No</b><br>(Gibson, 2010)               | <b>Intermediate</b><br>(Gibson, 2010)           | <b>No (m)</b><br>(Gibson, 2010)                              | <b>NA</b>                                         |
| <b>Tufted capuchin monkeys</b><br>( <i>Cebus apella nigrilus</i> ) | <b>NA</b>                                                                      | <b>Yes</b><br>(Janson, 1984; Lynch, 2005) | <b>Yes</b><br>(Janson, 1986; Lynch, 2005)                           | <b>Yes</b><br>(Janson, 1984; Lynch, 2005) | <b>High</b><br>(Burkart and van Schaik, 2010)   | <b>No (m)</b><br>(Lynch, 2005)                               | <b>Unidirectional</b><br>(Janson, 1984)           |
| <b>Woolly spider monkeys</b><br>( <i>Brachyteles arachnoides</i> ) | <b>No</b><br>(Milton, 1985)                                                    | <b>Yes</b><br>(Milton, 1985)              | <b>Yes</b><br>(Milton, 1985)                                        | <b>Yes</b><br>(Milton, 1985)              | <b>Intermediate</b><br>(Strier, 1997)           | <b>No (m)</b><br>(Milton, 1985)                              | <b>No</b><br>(Milton, 1985)                       |
| <b>Carnivores (Carnivora)</b>                                      |                                                                                |                                           |                                                                     |                                           |                                                 |                                                              |                                                   |
| <b>Species</b>                                                     | <b>Concealed mating</b>                                                        |                                           | <b>Public mating</b>                                                |                                           | <b>Degree of cooperation</b>                    | <b>Mating control</b>                                        | <b>Physical interference with mating</b>          |
|                                                                    | <b>Dominants</b>                                                               | <b>Subordinates</b>                       | <b>Dominants</b>                                                    | <b>Subordinates</b>                       |                                                 |                                                              |                                                   |
| <b>Banded mongooses</b><br>( <i>Mungos mungo</i> )                 | <b>Yes</b><br>(Cant, 2000)                                                     |                                           | <b>Yes</b><br>(Cant, 2000)                                          |                                           | <b>High</b><br>(Cant, 2003)                     | <b>No (m)</b><br>(Cant, 2000)                                | <b>Bi-directional</b><br>(Cant, 2000)             |
| <b>Dwarf mongooses</b><br>( <i>Helogale parvula</i> )              | <b>Yes?</b><br>(Creel et al., 1992)                                            | <b>Yes</b><br>(Creel et al., 1992)        | <b>Yes</b><br>(Creel et al., 1992)                                  | <b>Yes</b><br>(Creel et al., 1992)        | <b>High</b><br>(Rood, 1990)                     | <b>No (m)</b><br>(Creel et al., 1992; Keane et al., 1994)    | <b>Unidirectional</b><br>(Creel et al., 1992)     |
| <b>Lions</b><br>( <i>Panthera leo</i> )                            | <b>NA</b>                                                                      | <b>NA</b>                                 | <b>Yes</b><br>(Packer and Pusey, 1982)                              | <b>Yes</b><br>(Packer and Pusey, 1982)    | <b>Intermediate</b><br>(Packer and Pusey, 1982) | <b>No (m)</b><br>(Packer and Pusey, 1982)                    | <b>Unidirectional</b><br>(Packer and Pusey, 1982) |
| <b>Meerkats*</b><br>( <i>Suricata suricatta</i> )                  | No published observations of mating despite being studied >15 years            | <b>Yes</b><br>(Young et al., 2007)        | No published observations of mating despite being studied >15 years | <b>No</b><br>(Young et al., 2007)         | <b>High</b><br>(Young et al., 2007)             | <b>Yes (p)</b><br>(Griffin et al., 2002; Young et al., 2007) | <b>Unidirectional</b><br>(Young et al., 2007)     |
| <b>Spotted hyenas</b><br>( <i>Crocuta crocuta</i> )                | <b>Yes?</b><br>(Kruuk, 1972)                                                   | <b>Yes</b><br>(Kruuk, 1972)               | <b>Yes</b><br>(Kruuk, 1972)                                         | <b>Yes</b><br>(Kruuk, 1972)               | <b>Intermediate</b><br>(Holekamp et al., 2007)  | <b>No (m)</b><br>(Engh et al., 2002)                         | <b>No</b><br>(Kruuk, 1972)                        |
| <b>Even-toed ungulates (Artiodactyla)</b>                          |                                                                                |                                           |                                                                     |                                           |                                                 |                                                              |                                                   |
| <b>Species</b>                                                     | <b>Concealed mating</b>                                                        |                                           | <b>Public mating</b>                                                |                                           | <b>Degree of cooperation</b>                    | <b>Mating control</b>                                        | <b>Physical interference with mating</b>          |
|                                                                    | <b>Dominants</b>                                                               | <b>Subordinates</b>                       | <b>Dominants</b>                                                    | <b>Subordinates</b>                       |                                                 |                                                              |                                                   |
| <b>Bottlenose dolphins</b><br>( <i>Tursiops</i> sp.)               | <b>NA</b>                                                                      | <b>NA</b>                                 | <b>Yes</b><br>(Connor et al., 1992)                                 | <b>Yes</b><br>(Connor et al., 1992)       | <b>Intermediate</b><br>(Connor et al., 1992)    | <b>No (m)</b><br>(Connor et al., 1992)                       | <b>No</b><br>(Connor et al., 1992)                |
| <b>Rocky mountain bighorn sheep</b><br>( <i>Ovis canadensis</i> )  | <b>Yes</b><br>(Hogg, 1988, 1984)                                               |                                           | <b>Yes</b><br>(Hogg, 1988, 1984)                                    |                                           | <b>No</b><br>(Shackleton, 1985)                 | <b>No (m)</b><br>(Hogg, 1988, 1984)                          | <b>Bi-directional</b><br>(Hogg, 1988)             |
| <b>Hyrax (Hyracoidea)</b>                                          |                                                                                |                                           |                                                                     |                                           |                                                 |                                                              |                                                   |
| <b>Species</b>                                                     | <b>Concealed mating</b>                                                        |                                           | <b>Public mating</b>                                                |                                           | <b>Degree of cooperation</b>                    | <b>Mating control</b>                                        | <b>Physical interference with mating</b>          |
|                                                                    |                                                                                |                                           |                                                                     |                                           |                                                 |                                                              |                                                   |
| <b>Rock hyraxes</b><br>( <i>Procavia capensis</i> )                | <b>Yes</b><br>(Bar Ziv, 2013; Bar Ziv et al., 2016)                            |                                           | <b>Yes</b><br>(Bar Ziv, 2013; Bar Ziv et al., 2016)                 |                                           | <b>High</b><br>(Bar Ziv et al., 2016)           | <b>No (m)</b><br>(Bar Ziv, 2013; Bar Ziv et al., 2016)       | <b>Bi-directional</b><br>(Bar Ziv et al., 2016)   |
| <b>Rodents (Rodentia)</b>                                          |                                                                                |                                           |                                                                     |                                           |                                                 |                                                              |                                                   |
| <b>Species</b>                                                     | <b>Concealed mating</b>                                                        |                                           | <b>Public mating</b>                                                |                                           | <b>Degree of cooperation</b>                    | <b>Mating control</b>                                        | <b>Physical interference with mating</b>          |

|                                                                             |                                                                                                   |                                          |                                                                       |                                         |                                                   |                                                                  |                                                   |
|-----------------------------------------------------------------------------|---------------------------------------------------------------------------------------------------|------------------------------------------|-----------------------------------------------------------------------|-----------------------------------------|---------------------------------------------------|------------------------------------------------------------------|---------------------------------------------------|
| <b>Cape ground squirrels</b><br>( <i>Xerus inauris</i> )                    | <b>Yes</b><br>(Waterman, 1998)                                                                    |                                          | <b>Yes</b><br>(Waterman, 1998)                                        |                                         | <b>No</b><br>(Waterman, 1995)                     | <b>No (m)</b><br>(Manjerovic and Waterman, 2015; Waterman, 1998) | <b>Bi-directional</b><br>(Waterman, 1998)         |
| <b>Richardson's ground squirrels</b><br>( <i>Urocitellus richardsonii</i> ) | <b>Yes?</b><br>(Michener and Mclean, 1996)                                                        |                                          | <b>Yes (also vocal)</b><br>(Magyara, 2009; Michener and Mclean, 1996) |                                         | <b>No</b><br>(Michener, 1979)                     | <b>No (m)</b><br>(Michener and Mclean, 1996)                     | <b>Bi-directional</b><br>(Davis, 1982)            |
| Bird: Passerines (Passeriformes)                                            |                                                                                                   |                                          |                                                                       |                                         |                                                   |                                                                  |                                                   |
| Species                                                                     | Concealed mating                                                                                  |                                          | Public mating                                                         |                                         | Degree of cooperation                             | Mating control                                                   | Physical interference with mating                 |
|                                                                             | Dominants                                                                                         | Subordinates                             | Dominants                                                             | Subordinates                            |                                                   |                                                                  |                                                   |
| <b>Alpine accentors</b><br>( <i>Prunella collaris</i> )                     | <b>No</b><br>(Davies et al., 1996)                                                                | <b>Yes</b><br>(Davies et al., 1996)      | <b>Yes</b><br>(Davies et al., 1996)                                   | <b>No</b><br>(Davies et al., 1996)      | <b>Intermediate</b><br>(Davies et al., 1996)      | <b>No (m)</b><br>(Davies et al., 1996)                           | <b>Unidirectional</b><br>(Davies et al., 1996)    |
| <b>Arabian babblers</b><br>( <i>Turdoides squamiceps</i> )                  | <b>Yes</b><br>(Ben Mocha et al., 2018)                                                            | <b>Yes</b><br>(Ben Mocha et al., 2018)   | <b>No</b><br>(Ben Mocha et al., 2018)                                 | <b>No</b><br>(Ben Mocha et al., 2018)   | <b>High</b><br>(Zahavi, 1989)                     | <b>Yes (m)</b><br>(Ben Mocha et al., 2018; Perel, 1996)          | <b>Unidirectional</b><br>(Ben Mocha et al., 2018) |
| <b>Dunnocks</b><br>( <i>Prunella modularis</i> )                            | <b>Yes</b><br>(Davies, 1983; Davies et al., 1996)                                                 |                                          | <b>Yes?</b><br>(Davies, 1983; Davies et al., 1996)                    |                                         | <b>High</b><br>(Santos et al., 2015)              | <b>No (m)</b><br>(Davies et al., 1996)                           | <b>Bi-directional</b><br>(Davies et al., 1996)    |
| <b>Florida scrub jays*</b><br>( <i>Aphelocoma coerulescens</i> )            | No published observations of mating despite it being studied >15 years                            |                                          |                                                                       |                                         | <b>High</b><br>(Mumme et al., 2015)               | <b>Yes (p)</b><br>(Quinn et al., 1999)                           | <b>NA</b>                                         |
| <b>Long-tailed manakins</b><br>( <i>Chiroxiphia linearis</i> )              | <b>NA</b>                                                                                         | <b>Yes</b><br>(McDonald and Potts, 1994) | <b>NA</b>                                                             | <b>No</b><br>(McDonald and Potts, 1994) | <b>Intermediate</b><br>(McDonald and Potts, 1994) | <b>Yes (m)</b><br>(McDonald and Potts, 1994)                     | <b>NA</b>                                         |
| <b>Pied babblers*</b><br>( <i>Turdoides bicolor</i> )                       | No published observations of mating despite it being studied >15 years                            |                                          |                                                                       |                                         | <b>High</b><br>(Nelson-Flower and Ridley, 2015)   | <b>Yes (p)</b><br>(Nelson-Flower and Ridley, 2015)               | <b>NA</b>                                         |
| <b>Superb starlings*</b><br>( <i>Lamprotornis superbus</i> )                | No published observations of mating despite it being studied >15 years (but see Rubenstein, 2007) |                                          |                                                                       |                                         | <b>High</b><br>(Rubenstein, 2007)                 | <b>Yes (p)</b><br>(Rubenstein, 2007)                             | <b>NA</b>                                         |
| <b>White-winged choughs*</b><br>( <i>Corcorax melanorhamphos</i> )          | No published observations of mating despite it being studied >10 years                            |                                          |                                                                       |                                         | <b>High</b><br>(Heinsohn et al., 2000)            | <b>Yes (p)</b><br>(Heinsohn et al., 2000)                        | <b>NA</b>                                         |
| <b>Zebra finch</b><br>( <i>Taeniopygia guttata</i> )                        | <b>Yes</b><br>(Birkhead et al., 1988)                                                             |                                          | <b>Yes</b><br>(Birkhead et al., 1988)                                 |                                         | <b>No</b><br>(Zann, 1996)                         | <b>No (m)</b><br>(Birkhead et al., 1988)                         | <b>Bi-directional</b><br>(Birkhead et al., 1988)  |
| Bird: (Gruiformes)                                                          |                                                                                                   |                                          |                                                                       |                                         |                                                   |                                                                  |                                                   |
| Species                                                                     | Concealed mating                                                                                  |                                          | Public mating                                                         |                                         | Degree of cooperation                             | Mating control                                                   | Physical interference with mating                 |
|                                                                             | Dominants                                                                                         | Subordinates                             | Dominants                                                             | Subordinates                            |                                                   |                                                                  |                                                   |
| <b>Tasmanian native hens</b><br>( <i>Tribonyx mortierii</i> )               | <b>No</b><br>(Ridpath, 1972)                                                                      | <b>No</b><br>(Ridpath, 1972)             | <b>Yes</b><br>(Ridpath, 1972)                                         | <b>Yes</b><br>(Ridpath, 1972)           | <b>High</b><br>(Ridpath, 1972)                    | <b>No (m)</b><br>(Ridpath, 1972)                                 | <b>No</b><br>(Ridpath, 1972)                      |

“\*” indicates species for which the cooperation maintenance hypothesis predicts that dominant individuals will exhibit habitual concealment of mating. “?” indicates entries that are based on unpublished data or indirect evidence from published literature. Concealment was only considered as “Yes” when statistical evidence for active concealment was available or when behavioural strategies for concealment were observed (e.g., consortship). “No” use of concealed or public mating was considered when individuals were regularly observed to engage in one type of behaviour, but never in the other. Note that this is a conservative approach, as in most species concealed mating was not studied directly. “(vocal)” indicates species that inhibit distinct vocalisations that are typically produced during matings. In social systems where

---

dominant and subordinate group members physically interfere with each other's matings ("*bi-directional*" pattern of Physical interference with matings), no distinction was made between dominants and subordinates. The degree of cooperation was considered "*High*" for species with systematic alloparental care and as "*Intermediate*" for all other types of cooperative behaviour between one of the mating partners and other group members (e.g., within-group coalition, territory defence). Mating control was considered as "*Yes*" if one group member constantly monopolised matings with at least one other group member during the female's fertile periods. When data about the monopolisation of mating (m) were not available, paternity data (p) was used. Physical interference with mating was considered as "*Unidirectional*" when dominant individuals physically interfered with subordinates but not vice versa; "*No*" interference was considered when cases of physical interference with the mating of others was rarely observed. "*NA*" stands for data not available.

---

**Appendix 8.** Cultures for which data was available about whether social norms entitle spouses (husbands and/or wives) at least some control over sexual access to their spouse(s) (e.g., at least one spouse is restricted to have sexual intercourse only with his/her spouse or to have extramarital sex only with specific partners or to have extramarital sex for a limited extent only) (n=210). For geographical distribution of cultures see Appendices 2, 9-10.

| <b>Region</b> | <b>Sub-region*</b> | <b>Culture*</b> | <b>Mating control?</b> | <b>(Principal authorities, examples)</b>                                                               | <b>Sample<br/>(Survey/ (EA)<br/>Ethnographic<br/>Atlas/ (SCCS)<br/>Standard-Cross-<br/>Cultural-Sample)</b> |
|---------------|--------------------|-----------------|------------------------|--------------------------------------------------------------------------------------------------------|-------------------------------------------------------------------------------------------------------------|
| Africa        | Central Africa     | Azanda          | Yes                    | (Evans-Pritchard, 1962, p. 269, 1928, pp. 457-458(1); Lagae, 1926, p. 77; Larken, 1930, p. 102a)       | SCCS                                                                                                        |
| Africa        | Central Africa     | Barundi         | Yes                    | (Albert, 1963, pp. 193; 204; Meyer and Helmut, 1916, p. 164)                                           | Survey                                                                                                      |
| Africa        | Central Africa     | Mbuti           | Yes                    | (Turnbull, 1965, p. 181)                                                                               | SCCS                                                                                                        |
| Africa        | Central Africa     | Mongo (Nkundu)  | Yes                    | (Hulstaert and Vizedom, 1938, pp. 42–43; 448; 459)                                                     | SCCS                                                                                                        |
| Africa        | Central Africa     | Okiek           | Yes                    | (Huntingford, 1954, p. 135, 1953, pp. 66–67, 1951, p. 42)                                              | Survey                                                                                                      |
| Africa        | Central Africa     | Rwandans        | Yes                    | (Hove and Crawford, 1941, pp. 23–26)                                                                   | Survey                                                                                                      |
| Africa        | Central Africa     | Suku            | Yes                    | (Kopytoff, 1980, p. 195, 1965, p. 453, 1964, pp. 102–103)                                              | SCCS                                                                                                        |
| Africa        | Central Africa     | Teda            | Yes                    | (Chapelle and Schütze, 1957, pp. 232; 234; 237–239; 241; Kronenberg and Schütze, 1958, pp. 39; 41; 43) | SCCS                                                                                                        |
| Africa        | Eastern Africa     | Bagisu          | Yes                    | (Heald, 1989, pp. 33; 148; La Fontaine, 1959, pp. 34–35)                                               | Survey                                                                                                      |
| Africa        | Eastern Africa     | Banyoro         | Yes                    | (Beattie, 1958, p. 16)                                                                                 | EA                                                                                                          |
| Africa        | Eastern Africa     | Bena            | Yes                    | (Culwick et al., 1935, pp. 342–343; 360–361; 368; 371–372; Swartz, 1966, p. 99)                        | EA                                                                                                          |
| Africa        | Eastern Africa     | Ganda           | Yes                    | (Mair, 1934, pp. 55; 254; Roscoe, 1911, pp. 261–263; 338)                                              | SCCS                                                                                                        |
| Africa        | Eastern Africa     | Gikuyu          | Yes                    | (Kenyatta, 1953, pp. 182; 229)                                                                         | SCCS                                                                                                        |
| Africa        | Eastern Africa     | Hadza           | Yes                    | (Bagshawe, 1925, p. 127; Marlowe, 2010, p. 175, 2004, p. 692)                                          | EA                                                                                                          |
| Africa        | Eastern Africa     | Kaffa           | Yes                    | (Grühl et al., 1884, p. 232; Huntingford, 1955, p. 115)                                                | SCCS                                                                                                        |
| Africa        | Eastern Africa     | konso           | Yes                    | (Hallpike, 2008, p. 194)                                                                               | SCCS                                                                                                        |
| Africa        | Eastern Africa     | Maasai          | Yes                    | (Leakey, 1930, p. 202; Merker, 1910, p. 159)                                                           | SCCS                                                                                                        |

|        |                 |                    |     |                                                                                                                                    |        |
|--------|-----------------|--------------------|-----|------------------------------------------------------------------------------------------------------------------------------------|--------|
| Africa | Eastern Africa  | Mao                | Yes | (Grottanelli, 1940, pp. 275; 310)                                                                                                  | SCCS   |
| Africa | Eastern Africa  | Shilluk            | Yes | (Colson, 1952, pp. 60–61; Dempsey, 1955, p. 71; Howell, 1953, p. 97; Seligman and Seligman, 1932, pp. 68–69)                       | SCCS   |
| Africa | Eastern Africa  | Somali             | Yes | (Lewis, 1962, p. 35, 1955, p. 109)                                                                                                 | SCCS   |
| Africa | Eastern Africa  | Turkana            | Yes | (Emley, 1927, p. 189; Gulliver, 1951, pp. 8B; 169A-172b; 204A; 216A)                                                               | EA     |
| Africa | Northern Africa | Berbers of Morocco | Yes | (Coon, 1931, pp. 102–103; Hart, 1954, p. 61)                                                                                       | SCCS   |
| Africa | Northern Africa | Fellahin           | Yes | (Ammār, 1954, pp. 50; 185; 190)                                                                                                    | SCCS   |
| Africa | Northern Africa | Tuareg             | Yes | (Benhazera and Coleman, 1908, pp. 9; 16)                                                                                           | SCCS   |
| Africa | Southern Africa | Khoi               | Yes | (Schapera, 1930, pp. 252–253; Schultze et al., 1907, p. 100)                                                                       | SCCS   |
| Africa | Southern Africa | Lozi               | Yes | (Gluckman, 1958, p. 186)                                                                                                           | SCCS   |
| Africa | Southern Africa | Ovimbundu          | Yes | (Edwards, 1962, pp. 122; 126; 141–145; 153; Hambly, 1934, pp. 184; 203; McCulloch, 1952, p. 32)                                    | SCCS   |
| Africa | Southern Africa | Lakeshore Tonga    | Yes | (Van Velsen, 1964, pp. 86; 92–93; 98–102)                                                                                          | EA     |
| Africa | Southern Africa | Shona              | Yes | (Aschwanden and Cooper, 1987, p. 179; Bullock, 1950, pp. 116; 245; 262; 264; Gelfand, 1979, p. 1; Gelfand and Hannan, 1968, p. 46) | EA     |
| Africa | Southern Africa | Tanala             | Yes | (Linton, 1933, p. 297)                                                                                                             | SCCS   |
| Africa | Western Africa  | Bambara            | Yes | (Henry and Coleman, 1910, pp. 170–173; 176; Monteil and Looney, 1924, p. 226)                                                      | SCCS   |
| Africa | Western Africa  | katab              | Yes | (Meek, 1931, pp. 44; 77; 121)                                                                                                      | EA     |
| Africa | Western Africa  | Mende              | Yes | (Little, 1951, pp. 142; 150)                                                                                                       | SCCS   |
| Africa | Western Africa  | Nupe               | Yes | (Nadel et al., 1942, pp. 152; 398)                                                                                                 | EA     |
| Africa | Western Africa  | Songhai            | Yes | (Rouch, 1954, pp. 38; 43)                                                                                                          | SCCS   |
| Africa | Western Africa  | Tallensi           | Yes | (Fortes, 1949, pp. 28; 109–110)                                                                                                    | SCCS   |
| Africa | Western Africa  | Yoruba             | Yes | (Ajisafe, 1924, pp. 35; 56; Lloyd, 1965, p. 564)                                                                                   | EA     |
| Asia   | Caucasus        | Abkhazian          | Yes | (Benet, 1974, p. 47)                                                                                                               | SCCS   |
| Asia   | Central Asia    | Inner Mongolia     | Yes | (Chang et al., 1956, pp. 173; 187)                                                                                                 | Survey |
| Asia   | Central Asia    | Kazakh             | Yes | (Hudson, 1938, p. 47)                                                                                                              | SCCS   |

|      |              |                                           |     |                                                                                                                                                                                                                           |        |
|------|--------------|-------------------------------------------|-----|---------------------------------------------------------------------------------------------------------------------------------------------------------------------------------------------------------------------------|--------|
| Asia | Central Asia | Lepcha                                    | Yes | (Gorer and Hutton, 1938, pp. 160–162; 171; 327)                                                                                                                                                                           | SCCS   |
| Asia | Central Asia | Mongolia                                  | Yes | (Vreeland, 1973, pp. 78; 241)                                                                                                                                                                                             | SCCS   |
| Asia | Central Asia | Tibetans                                  | Yes | (Bell, 1928, p. 195)                                                                                                                                                                                                      | EA     |
| Asia | Central Asia | Xinjiang<br>Uygur<br>autonomous<br>region | Yes | (Norins and Lattimore, 1944, p. 80)                                                                                                                                                                                       | Survey |
| Asia | East Asia    | Ainu                                      | Yes | (Batchelor, 1927, p. 38)                                                                                                                                                                                                  | SCCS   |
| Asia | East Asia    | Miao                                      | Yes | (Graham, 1954, p. 4, 1937, p. 27)                                                                                                                                                                                         | Survey |
| Asia | East Asia    | Manchu                                    | Yes | (Shirokogorov, 1924, pp. 100–104; 150)                                                                                                                                                                                    | SCCS   |
| Asia | East Asia    | Monguor                                   | Yes | (Schram, 1957, p. 71b; Schram and Lattimore, 1954, p. 78a; Schram and Winchell, 1932, pp. 152; 162)                                                                                                                       | EA     |
| Asia | East Asia    | Okayama                                   | Yes | (Cornell, 1953, p. 203; De Vos, 1973, pp. 81–82, 86; De Vos and Wagatsuma, 1961, p. 1216)                                                                                                                                 | SCCS   |
| Asia | East Asia    | Taiwan<br>Hokkien                         | Yes | (Barnett, 1971, p. 447; Diamond, 1969, p. 60; Feuchtwang, 1974, p. 124; Gallin, 1966, p. 122; Harrell, 1982, pp. 143–144; Meskill, 1979, p. 224; Wolf, 1969, pp. 200–203; 889, 1968, p. 69; Wolf and Huang, 1980, p. 145) | Survey |
| Asia | North Asia   | Chukchee                                  | Yes | (Bogoraz-Tan, 1909, pp. 401–402; 572–575; 602–603; Sverdrup, 1938, pp. 122–125)                                                                                                                                           | SCCS   |
| Asia | North Asia   | Koryaks                                   | Yes | (Jochelson, 1905, pp. 733; 735; 756–757)                                                                                                                                                                                  | EA     |
| Asia | North Asia   | Nivkh<br>(Gilyak)                         | Yes | (Black, 1973, pp. 63–65; Shrenk and Nagler, 1881, p. 1039; Shternberg et al., 1933, pp. 70–73; 227–228; 269–275)                                                                                                          | SCCS   |
| Asia | North Asia   | Yakut                                     | Yes | (Kharuzin, 1898, pp. 42–43; Popov, 1946, pp. 18–19; Sieroszewski, 1993, pp. 896; 911–912)                                                                                                                                 | Survey |
| Asia | South Asia   | Andamans                                  | Yes | (Radcliffe-Brown, 1922, pp. 50; 70)                                                                                                                                                                                       | SCCS   |
| Asia | South Asia   | Badaga                                    | Yes | (Hockings, 1980, p. 55)                                                                                                                                                                                                   | Survey |
| Asia | South Asia   | Bengali                                   | Yes | (Bhattacharyya, 1976, p. 126; Fruzzetti, 1982, pp. 96; 124; Rohner et al., 1988, p. 56)                                                                                                                                   | Survey |



|        |                |                     |     |                                                                                                                                                                                                                                                              |        |
|--------|----------------|---------------------|-----|--------------------------------------------------------------------------------------------------------------------------------------------------------------------------------------------------------------------------------------------------------------|--------|
| Asia   | South Asia     | Bhils               | Yes | (Naik, 1956, pp. 53; 142; 227; 230–231)                                                                                                                                                                                                                      | EA     |
| Asia   | South Asia     | Burusho             | Yes | (Lorimer, 1939, p. 190; Tobe, 1960, pp. 349; 363; 420)                                                                                                                                                                                                       | SCCS   |
| Asia   | South Asia     | Khasi               | Yes | (Nakane, 1967, pp. 137–138)                                                                                                                                                                                                                                  | Survey |
| Asia   | South Asia     | Gond                | Yes | (Elwin, 1947, pp. 43; 146, 1943, p. 40; Grigson and Elwin, 1949, pp. 223; 261)                                                                                                                                                                               | SCCS   |
| Asia   | South Asia     | Nicobarese          | Yes | (Man et al., 1932, p. 50)                                                                                                                                                                                                                                    | SCCS   |
| Asia   | South Asia     | Santal              | Yes | (Archer, 1984, pp. 77; 152; 330; 333; 342; 515, 1974, pp. 81; 88; 157; 197; 214; 216; 348; Biswas, 1956, p. 51; Culshaw, 1949, pp. 145; 148; Kochar, 1970, p. 86; Mukherjea, 1962, pp. 196; 212; 402–403; 407; 418–420; Skrefsrud et al., 1942, pp. 82; 130) | SCCS   |
| Asia   | South Asia     | Telugu              | Yes | (Dube, 1955, pp. 144; 147; Hiebert, 1971, pp. 22; 110)                                                                                                                                                                                                       | EA     |
| Asia   | South Asia     | Vedda               | Yes | (Bailey, 1863, p. 291; Seligman et al., 1911, pp. 87; 96)                                                                                                                                                                                                    | SCCS   |
| Asia   | Southeast Asia | Alorese             | Yes | (Du Bois et al., 1944, pp. 100; 178)                                                                                                                                                                                                                         | SCCS   |
| Asia   | Southeast Asia | Balinese            | Yes | (Covarrubias, 1938, p. 158)                                                                                                                                                                                                                                  | SCCS   |
| Asia   | Southeast Asia | Cambodians          | Yes | (Ebihara, 1971, p. 492; Ebihara and Matthiasson, 1974, p. 329; Zhou et al., 1987, pp. 14, 31)                                                                                                                                                                | SCCS   |
| Asia   | Southeast Asia | Ifugao              | Yes | (Barton, 1938, pp. 60–62, 1919, p. 24)                                                                                                                                                                                                                       | SCCS   |
| Asia   | Southeast Asia | Javanese            | Yes | (Geertz, 1961, p. 128)                                                                                                                                                                                                                                       | SCCS   |
| Asia   | Southeast Asia | Kachin              | Yes | (Leach, 1954, pp. 75; 137)                                                                                                                                                                                                                                   | EA     |
| Asia   | Southeast Asia | Karen               | Yes | (Marshall, 1945, p. 13, 1922, pp. 145; 148; 287)                                                                                                                                                                                                             | EA     |
| Asia   | Southeast Asia | Rungus Dusun        | Yes | (Appell, 1991, pp. 79; 87; 94; 97; 99, 1965, pp. 55–56; 311; Appell and Appell, 1993, p. 19)                                                                                                                                                                 | Survey |
| Asia   | Southeast Asia | Semang              | Yes | (Schebesta and Schütze, 1957, p. 143)                                                                                                                                                                                                                        | SCCS   |
| Asia   | Southeast Asia | Southern Toraja     | Yes | (Nooy-Palm, 1986, pp. 34–37; 116)                                                                                                                                                                                                                            | Survey |
| Asia   | Southeast Asia | Vietnamese          | Yes | (Aubaret and Howard, 1865, p. 103; Tran-van-Trai and Messner, 1942, pp. 67–68; 181–182)                                                                                                                                                                      | Survey |
| Europe | British Isles  | British (1714-1815) | Yes | (Malone and Abate, 2012, p. 4; Razi, 1985)                                                                                                                                                                                                                   | Survey |

|                                  |                      |                        |      |                                                                                                                                                                                                                                                                 |        |
|----------------------------------|----------------------|------------------------|------|-----------------------------------------------------------------------------------------------------------------------------------------------------------------------------------------------------------------------------------------------------------------|--------|
| Europe                           | British Isles        | Highland Scots         | Yes  | (Ducey, 1971, pp. 290; 346; 389; Geddes, 1955, p. 218)                                                                                                                                                                                                          | Survey |
| Europe                           | British Isles        | Rural Irish            | Yes  | (Arensberg and Kimball, 1940, pp. 208; 213; 218; Fox, 1995, p. 160)                                                                                                                                                                                             | SCCS   |
| Europe                           | Scandinavia          | Early Icelanders       | Yes? | (Karras, 1992, p. 294)                                                                                                                                                                                                                                          | Survey |
| Europe                           | Scandinavia          | Saami/Lapps            | Yes  | (Itkonen et al., 1948, p. 544; Pehrson, 1957, p. 68; Pelto, 1962, p. 62; Scheffer, 1704, pp. 33–35)                                                                                                                                                             | SCCS   |
| Europe                           | Southern Europe      | Basques                | Yes  | (Del Valle et al., 1985, pp. 211; 213; Douglass, 1969, pp. 108–109)                                                                                                                                                                                             | Survey |
| Europe                           | Southern Europe      | Imperial Romans        | Yes  | (Carcopino et al., 1940, pp. 93–94; Pellisson and Wilkinson, 1897, pp. 49; 54)                                                                                                                                                                                  | Survey |
| Europe                           | South-eastern Europe | Albanians              | Yes  | (Durham, 1928, pp. 69; 205; Hasluck and Hutton, 1954, pp. 48; 198; 210; 212–214; 265)                                                                                                                                                                           | SCCS   |
| Europe                           | South-eastern Europe | Bosnian Muslims        | Yes  | (Bringa, 1995, p. 91; Lockwood, 1983, p. 73)                                                                                                                                                                                                                    | Survey |
| Europe                           | South-eastern Europe | Croats                 | Yes  | (Gilliland, 1986, p. 244)                                                                                                                                                                                                                                       | Survey |
| Europe                           | South-eastern Europe | Greeks                 | Yes  | (Campbell, 1964, pp. 100; 152; 199; Herzfeld, 1991, pp. 27; 90, 1983, p. 83; Hirschon, 1989, p. 149, 1978, p. 67; Iossifides, 1991, p. 137; Kavvadias and Schütze, 1965, pp. 159; 245–246; 265; Kennedy, 1986, p. 124; Lozios and Papataxiarchis, 1991, p. 226) | Survey |
| Europe                           | South-eastern Europe | Montenegrins           | Yes  | (Boehm, 1984, p. 71)                                                                                                                                                                                                                                            | Survey |
| Europe                           | South-eastern Europe | Serbs                  | Yes  | (Halpern 1967, p. 223)                                                                                                                                                                                                                                          | EA     |
| Middle America and the Caribbean | Caribbean            | Haitians               | Yes  | (Herskovits, 1937, pp. 42; 116; Simpson, 1942, p. 657)                                                                                                                                                                                                          | SCCS   |
| Middle America and the Caribbean | Caribbean            | Island Carib           | Yes  | (Breton et al., 1665, pp. 12; 24–25; Du Tertre et al., 1667, p. 24)                                                                                                                                                                                             | SCCS   |
| Middle America and the Caribbean | Caribbean            | Puerto Ricans (Island) | Yes  | (Steward et al., 1956, pp. 155[a]; 292[b])                                                                                                                                                                                                                      | Survey |

|                                  |                 |             |     |                                                                                                                              |        |
|----------------------------------|-----------------|-------------|-----|------------------------------------------------------------------------------------------------------------------------------|--------|
| Middle America and the Caribbean | Central America | Kuna        | Yes | (Nordenskiöld et al., 1938, p. 32; Wafer, 1934, p. 96b)                                                                      | SCCS   |
| Middle America and the Caribbean | Central America | Talamancans | Yes | (Gabb, 1876, pp. 496–497)                                                                                                    | SCCS   |
| Middle America and the Caribbean | Central Mexico  | Aztecs      | Yes | (Durán, 1975, pp. 95; 283, 1964, p. 131; Sahagún et al., 1974, p. 172, 1957, pp. 6; 93; Soustelle and O'Brian, 1961, p. 185) | SCCS   |
| Middle America and the Caribbean | Central Mexico  | Nahua       | Yes | (Lewis, 1951, pp. 78; 278; 328)                                                                                              | Survey |
| Middle America and the Caribbean | Central Mexico  | Zapotec     | Yes | (Parsons, 1970, pp. 115–116; Taylor, 1979, pp. 185–186)                                                                      | Survey |
| Middle America and the Caribbean | Maya area       | Mam Maya    | Yes | (Wagley, 1949, pp. 41–42)                                                                                                    | EA     |
| Middle America and the Caribbean | Maya area       | Maya        | Yes | (Elmendorf, 1976, p. 91; Redfield and Rojas Villa, 1962, pp. 96–97)                                                          | Survey |
| Middle America and the Caribbean | Maya area       | Tzeltal     | Yes | (Nash, 1970, p. 281)                                                                                                         | Survey |
| Middle America and the Caribbean | Northern Mexico | Tarahumara  | Yes | (Bennett and Zingg, 1935, pp. 211; 230; Fried, 1951, pp. 156; 164; 201)                                                      | Survey |
| Middle America and the Caribbean | Northern Mexico | Huichol     | Yes | (Furst, 1967, p. 61; Klineberg, 1934, p. 456; Lumholtz, 1973, p. 91; Valadez, 1996, p. 276; Zingg, 1938, pp. xi; 140)        | SCCS   |
| Middle East                      | Middle East     | Babylonia   | Yes | (Saggs, 1988, pp. 155; 179)                                                                                                  | SCCS   |
| Middle East                      | Middle East     | Basseri     | Yes | (Barth, 1961, p. 139)                                                                                                        | SCCS   |

|               |                      |                                    |     |                                                                                                                                                          |        |
|---------------|----------------------|------------------------------------|-----|----------------------------------------------------------------------------------------------------------------------------------------------------------|--------|
| Middle East   | Middle East          | Bedouins (Kuwait and Saudi Arabia) | Yes | (Dickson, 1951, pp. 148; 202)                                                                                                                            | Survey |
| Middle East   | Middle East          | Israelis (orthodox Jews: Hassidim) | Yes | (Rockman, 1993, pp. 256–257)                                                                                                                             | Survey |
| Middle East   | Middle East          | Iran                               | Yes | (Hegland, 2004, p. 524)                                                                                                                                  | Survey |
| Middle East   | Middle East          | Kurds                              | Yes | (Leach, 1940, p. 55; Masters, 1953, pp. 186; 241–242)                                                                                                    | SCCS   |
| Middle East   | Middle East          | Lur                                | Yes | (Friedl, 1997, pp. 86; 224)                                                                                                                              | Survey |
| Middle East   | Middle East          | Palestinians                       | Yes | (Granqvist, 1947, p. 43; Lutfiyya, 1966, p. 148)                                                                                                         | Survey |
| Middle East   | Middle East          | Rwala Bedouins                     | Yes | (Musil, 1928, p. 238)                                                                                                                                    | SCCS   |
| Middle East   | Middle East          | Turks                              | Yes | (Stirling, 1965, p. 115)                                                                                                                                 | SCCS   |
| North America | Arctic and Subarctic | Aleut                              | Yes | (Innokentii et al., 1840b, p. 10)                                                                                                                        | SCCS   |
| North America | Arctic and Subarctic | Alutiiq                            | Yes | (Birket-Smith, 1953, p. 80; Hrdlicka, 1975, p. 78)                                                                                                       | Survey |
| North America | Arctic and Subarctic | Chipewyans                         | Yes | (Carter, 1989, p. 10; Hearne, 1958, p. 83; Smith, 1982, p. 29; VanStone, 1963, pp. 49; 50)                                                               | Survey |
| North America | Arctic and Subarctic | Kaska                              | Yes | (Honigsmann, 1954, pp. 91–92; 126–128)                                                                                                                   | SCCS   |
| North America | Arctic and Subarctic | Ingalik                            | Yes | (Osgood, 1958, pp. 210; 215–216)                                                                                                                         | SCCS   |
| North America | Arctic and Subarctic | Innu/Montagnais                    | Yes | (Lips, 1947)                                                                                                                                             | SCCS   |
| North America | Arctic and Subarctic | Ojibwa                             | Yes | (Hallowell, 1976, p. 347)                                                                                                                                | SCCS   |
| North America | Arctic and Subarctic | Western Woods Cree                 | Yes | (Smith, 1981, p. 261)                                                                                                                                    | Survey |
| North America | Eastern woodlands    | Cherokee                           | Yes | (Fox, 2003, pp. 360–361; Gilbert, 1978, p. 340; Mooney, 1982, pp. 661–662; Strickland, 1975, pp. 21; 27; 31), but see also (Reid, 1970, pp. 69; 114–119) | Survey |
| North America | Eastern woodlands    | Creek                              | Yes | (Swanton, 1928, pp. 346–350; 370)                                                                                                                        | SCCS   |
| North America | Eastern woodlands    | Delaware                           | Yes | (Goddard, 1978, p. 219; Kinietz, 1946, p. 59; Newcomb, 1956, p. 38; Zeisberger et al., 1910, p. 82)                                                      | EA     |

|               |                                |                                        |      |                                                     |        |
|---------------|--------------------------------|----------------------------------------|------|-----------------------------------------------------|--------|
| North America | Eastern woodlands              | Iroquois                               | Yes  | (Morgan and Lloyd, 1901, p. 322);                   | EA     |
| North America | Eastern woodlands              | Mi'kmaq                                | Yes  | (Clercq and Ganong, 1910, pp. 250–251, 261)         | SCCS   |
| North America | Eastern woodlands              | Natchez                                | Yes  | (Swanton, 1911, pp. 94–96)                          | SCCS   |
| North America | Northwest Coast and California | Chinookans of the Lower Columbia River | Yes  | (Ray, 1938, p. 73)                                  | EA     |
| North America | Northwest Coast and California | Haida                                  | Yes  | (Murdock, 1934, p. 372; Swanton, 1905, p. 50)       | SCCS   |
| North America | Northwest Coast and California | Nuxalk (Bellacoola)                    | Yes  | (McIlwraith, 1948, pp. 419, 427)                    | SCCS   |
| North America | Northwest Coast and California | Pomo                                   | Yes  | (Loeb, 1926, pp. 281–281; 298)                      | SCCS   |
| North America | Northwest Coast and California | Quinault                               | Yes  | (Olson, 1936, p. 107)                               | Survey |
| North America | Northwest Coast and California | Tubatulabal                            | Yes  | (Voegelin, 1938, p. 56(b))                          | EA     |
| North America | Northwest Coast and California | Yokuts                                 | Yes  | (Gayton, 1948, p. 106)                              | SCCS   |
| North America | Northwest Coast and California | Yurok                                  | Yes  | (Heizer et al., 1952, p. 168; Kroeber, 1925, p. 32) | SCCS   |
| North America | Plains and Plateau             | Klamath                                | Yes  | (Spier, 1930, pp. 50–51; 279; 301);                 | SCCS   |
| North America | Plains and Plateau             | Pawnee                                 | Yes  | (Weltfish, 1965, pp. 17–18; 338)                    | SCCS   |
| North America | Regional and Ethnic Cultures   | African Americans                      | Yes  | (Davis and Dollard, 1958; Powdermaker, 1968)        | Survey |
| North America | Regional and Ethnic Cultures   | Amish                                  | Yes  | (Hostetler, 1980, p. 157; Nagata, 1987, p. 261)     | Survey |
| North America | Regional and Ethnic Cultures   | Arab Canadians                         | Yes? | (Jabbara, 1991, pp. 45–46; Skoggard, 1999, p. 7)    | Survey |
| North America | Regional and Ethnic Cultures   | Basque Americans                       | Yes  | (Decroos, 1983, p. 61)                              | Survey |

|               |                              |                          |     |                                                                                                                                                                                                                                                                                                                                                                 |        |
|---------------|------------------------------|--------------------------|-----|-----------------------------------------------------------------------------------------------------------------------------------------------------------------------------------------------------------------------------------------------------------------------------------------------------------------------------------------------------------------|--------|
| North America | Regional and Ethnic Cultures | Cajuns                   | Yes | (Brasseaux, 1987, p. 69)                                                                                                                                                                                                                                                                                                                                        | Survey |
| North America | Regional and Ethnic Cultures | Chicanos                 | Yes | (Achor, 1978; Kiev, 1968)                                                                                                                                                                                                                                                                                                                                       | Survey |
| North America | Regional and Ethnic Cultures | Chinese Americans        | Yes | (Chen, 1992; Wong, 1982)                                                                                                                                                                                                                                                                                                                                        | Survey |
| North America | Regional and Ethnic Cultures | Cuban Americans          | Yes | (Boone, 1989; Boswell and Curtis, 1984)                                                                                                                                                                                                                                                                                                                         | Survey |
| North America | Regional and Ethnic Cultures | Italian Americans        | Yes | (Campisi, 1958)                                                                                                                                                                                                                                                                                                                                                 | Survey |
| North America | Regional and Ethnic Cultures | Korean Americans         | Yes | (Yang, 1987)                                                                                                                                                                                                                                                                                                                                                    | Survey |
| North America | Regional and Ethnic Cultures | Puerto Ricans (Mainland) | Yes | (Bourgois, 1996b; Harwood, 1987)                                                                                                                                                                                                                                                                                                                                | Survey |
| North America | Regional and Ethnic Cultures | Sea Islanders            | Yes | (Creel, 1988, p. 245; Johnson, 1930, p. 135)                                                                                                                                                                                                                                                                                                                    | Survey |
| North America | Southwest and Basin          | Eastern Apache           | Yes | (Opler, 1941, pp. 16; 145; 406–411)                                                                                                                                                                                                                                                                                                                             | SCCS   |
| North America | Southwest and Basin          | Havasupai                | Yes | (Spier, 1928, pp. 221; 224–225)                                                                                                                                                                                                                                                                                                                                 | SCCS   |
| North America | Southwest and Basin          | Hopi                     | Yes | (Aberle, 1951, pp. 69–78; Dennis, 1940, p. 18; Malotki and Lomatuway'ma, 1987, p. 182; Schlegel, 2000, p. 3, 1988, pp. 43; 51; Talayesva and Simmons, 1942, p. 276; Titiev, 1944, pp. 40–42)                                                                                                                                                                    | EA     |
| North America | Southwest and Basin          | Maricopa                 | Yes | (Spier, 1933, pp. 224–225)                                                                                                                                                                                                                                                                                                                                      | Survey |
| North America | Southwest and Basin          | Mormons                  | Yes | (Altman and Ginat, 1996; Fife and Fife, 1966)                                                                                                                                                                                                                                                                                                                   | Survey |
| North America | Southwest and Basin          | Navajo                   | Yes | (Bailey, 1950, p. 24; Bauer, 1985, p. 86; Hill, 1938, p. 144; Kluckhohn et al., 1971, p. 303; Ladd, 1957, pp. 210; 241; 243; Left Handed and Dyk, 1938, pp. 372–376; Leighton and Leighton, 1944, pp. 21–22; Leighton and Kluckhohn, 1947, pp. 86–87; Matthews, 1899, pp. 4–5; Rapoport, 1954, p. 46; Reichard, 1950, p. 193; Van Valkenburgh, 1938, pp. 40–41) | EA     |
| North America | Southwest and Basin          | Northern Paiute          | Yes | (Whiting, 1950, pp. 76–78)                                                                                                                                                                                                                                                                                                                                      | SCCS   |
| North America | Southwest and Basin          | O'odham                  | Yes | (Joseph et al., 1949, pp. 49; 221)                                                                                                                                                                                                                                                                                                                              | SCCS   |
| North America | Southwest and Basin          | Ute                      | Yes | (Opler, 1963, p. 151)                                                                                                                                                                                                                                                                                                                                           | EA     |

|               |                     |                             |      |                                                                                                                                                          |        |
|---------------|---------------------|-----------------------------|------|----------------------------------------------------------------------------------------------------------------------------------------------------------|--------|
| North America | Southwest and Basin | Zia Pueblo                  | Yes  | (Hoebel, 1969, pp. 103; 108; White, 1962, pp. 208; 210)                                                                                                  | EA     |
| Oceania       | Australia           | Tiwi                        | Yes  | (Hart and Pilling, 1960, pp. 36; 39; 46).                                                                                                                | SCCS   |
| Oceania       | Melanesia           | Kanak                       | Yes  | (Leenhardt, 1930, pp. 66, 239)                                                                                                                           | SCCS   |
| Oceania       | Melanesia           | Kapauku                     | Yes  | (Pospisil, 1958, pp. 57–58, 285)                                                                                                                         | SCCS   |
| Oceania       | Melanesia           | Kimam                       | Yes  | (Serpenti, 1965, pp. 145, 179–180)                                                                                                                       | SCCS   |
| Oceania       | Melanesia           | Kwoma                       | Yes  | (Whiting, 1970, p. 225, 1941, p. 126)                                                                                                                    | SCCS   |
| Oceania       | Melanesia           | Lesu                        | Yes  | (Powdermaker, 1933, pp. 228; 244; 247–248; 251; 277–283, 1931, p. 354)                                                                                   | SCCS   |
| Oceania       | Melanesia           | Malekula                    | Yes  | (Deacon and Wedgwood, 1934, pp. 149–150; 154)                                                                                                            | Survey |
| Oceania       | Melanesia           | Manus                       | Yes  | (Fortune and Council, 1935, pp. 344–345; Mead, 1956, p. 335).                                                                                            | SCCS   |
| Oceania       | Melanesia           | Northeastern Massim (Muyuw) | Yes  | (Damon, 1990, pp. 42; 133, 1983, p. 49)                                                                                                                  | Survey |
| Oceania       | Melanesia           | Orokaiva                    | Yes  | (Broude and Greene, 1976; Newton, 1989, p. 36; Williams and Murray, 1930, p. 321)                                                                        | SCCS   |
| Oceania       | Melanesia           | Sa                          | Yes? | (Lane and Lane, 1957, pp. 23–24)                                                                                                                         | SCCS   |
| Oceania       | Melanesia           | Santa Cruz Islanders        | Yes  | (Davenport, 1969, p. 210; Graebner and Schütze, 1909, p. 133; Speiser and Schütze, 1916, p. 109)                                                         | Survey |
| Oceania       | Melanesia           | Siwai                       | Yes  | (Oliver, 1955, pp. 95; 157; 167; 442)                                                                                                                    | SCCS   |
| Oceania       | Melanesia           | Tinputz                     | Yes  | (Blackwood, 1935, pp. 97; 114; 119)                                                                                                                      | Survey |
| Oceania       | Melanesia           | Trobrianders                | Yes  | (Malinowski, 1935, pp. 202–203, 1929, pp. 68; 114; 317–318; 438; 493, 1927, p. 9, 1926, p. 84, 1922, pp. 42; 47; 54)                                     | SCCS   |
| Oceania       | Melanesia           | Wogeo                       | Yes  | (Hogbin, 1945, pp. 334; 342, 1938, p. 238, 1935, pp. 320–325);                                                                                           | EA     |
| Oceania       | Micronesia          | Belau                       | Yes  | (Barnett, 1963, pp. 33–34, 1949, pp. 91; 130; 133–134; Force and Force, 1972, pp. 24; 29; Kubary, 2009, pp. 6; 14)                                       | SCCS   |
| Oceania       | Micronesia          | Chuuk                       | Yes  | (Bollig, 1927, p. 104; Fischer, 1950, p. 21; Gladwin and Sarason, 1953, pp. 124; 127–128; 287–288; Goodenough, 1949, p. 615; Swartz, 1958, pp. 468; 480) | SCCS   |
| Oceania       | Micronesia          | Marshallese                 | Yes  | (Erdland and Neuse, 1914, p. 89)                                                                                                                         | SCCS   |
| Oceania       | Micronesia          | Yapese                      | Yes  | (Lingenfelter, 1975, p. 66; Müller, 1917, p. 386)                                                                                                        | SCCS   |

|               |                    |                    |     |                                                                                                            |        |
|---------------|--------------------|--------------------|-----|------------------------------------------------------------------------------------------------------------|--------|
| Oceania       | Polynesia          | Hawaiians          | Yes | (Handy and Pukui, 1972, pp. 109; 162)                                                                      | EA     |
| Oceania       | Polynesia          | Lau Fijians        | Yes | (Hocart, 1929, pp. 36; 158; Thompson, 1940b, p. 58)                                                        | EA     |
| Oceania       | Polynesia          | Maori              | Yes | (Best, 1924, pp. 474–475; Buck, 1952, pp. 370–371; Firth, 1959, p. 120)                                    | SCCS   |
| Oceania       | Polynesia          | Marquesas          | Yes | (Handy, 1923, p. 98; Suggs, 1963, p. 51)                                                                   | SCCS   |
| Oceania       | Polynesia          | Rapa Nui           | Yes | (Métraux, 1940, p. 114; Routledge, 1919, p. 226)                                                           | Survey |
| Oceania       | Polynesia          | Samoaans           | Yes | (Mead, 1928, p. 104; Turner, 1884, pp. 91; 177)                                                            | SCCS   |
| Oceania       | Polynesia          | Tongans            | Yes | (Gifford, 1929)                                                                                            | EA     |
| South America | Amazon and Orinoco | Barama River Carib | Yes | (Gillin, 1936, pp. 145; 149; 186)                                                                          | SCCS   |
| South America | Amazon and Orinoco | Jivaro             | Yes | (Harner, 1973, pp. 106–107; Karsten, 1935, pp. 222–223; 271; Reiss, 1880, p. 11)                           | SCCS   |
| South America | Amazon and Orinoco | Mundurucu          | Yes | (Murphy, 1960, p. 87, 1954, p. 42; Murphy and Murphy, 1985, pp. 171–172; 242–243)                          | SCCS   |
| South America | Amazon and Orinoco | Nambicuara         | Yes | (Lévi-Strauss and Sittler, 1948, p. 367; Pinto and Brunel, 1938, p. 46)                                    | SCCS   |
| South America | Amazon and Orinoco | Ndyuka             | Yes | (Köbben, 1969, p. 121)                                                                                     | Survey |
| South America | Amazon and Orinoco | Saramaka           | Yes | (Herskovits and Herskovits, 1934, pp. 73–75, 204–205; Price, 1993, pp. 46–47; 58)                          | SCCS   |
| South America | Amazon and Orinoco | Shipibo            | Yes | (Abelove, 2000, p. 52; Bergman, 1980, p. 79; Eakin et al., 1980, p. 37)                                    | Survey |
| South America | Amazon and Orinoco | Sirionó            | Yes | (Holmberg, 1950, pp. 58–59; 61; 64)                                                                        | SCCS   |
| South America | Amazon and Orinoco | Trumai             | Yes | (Murphy and Quain, 1955, p. 48)                                                                            | SCCS   |
| South America | Amazon and Orinoco | Yanoama            | Yes | (Barker and Muirden, 1959, p. 3; Becher and Schütze, 1960, p. 146; Chagnon, 1967, pp. 63–64; 67–69; 82–83) | SCCS   |
| South America | Central Andes      | Mapuche            | Yes | (Faron, 1961, pp. 131–133; Latham, 1909, pp. 354, 356; Titiev, 1951, p. 103)                               | SCCS   |
| South America | Central Andes      | Saraguro Quichua   | Yes | (Finerman, 2004)                                                                                           | Survey |



|               |               |                           |      |                                                                                                   |        |
|---------------|---------------|---------------------------|------|---------------------------------------------------------------------------------------------------|--------|
| South America | Eastern       | Bahia Brazilians          | Yes  | (Borges, 1994, pp. 78; 100; 123; 140; 159; 202; Hutchinson, 1957, p. 147; Schwartz, 1985, p. 289) | Survey |
| South America | Eastern       | Bororo                    | Yes  | (Levak, 1974, pp. 84; 87)                                                                         | Survey |
| South America | Eastern       | Canela (Timbira)          | Yes  | (Nimuendaju and Lowie, 1946, pp. 104; 124; 129)                                                   | SCCS   |
| South America | Eastern       | Tupinamba                 | Yes  | (Léry, 1906, p. 563; Thevet, 1878, p. 212 1)                                                      | SCCS   |
| South America | Eastern       | Warao                     | Yes  | (Turrado Moreno & Muirden, 1945, p. 257-260)                                                      | SCCS   |
| South America | Eastern       | Xokleng (Aweikoma)        | Yes  | (Henry et al., 1941, pp. 35–36)                                                                   | SCCS   |
| South America | North-Western | Chachi                    | Yes  | (Altschuler, 1965, pp. 73; 165–166; 169)                                                          | Survey |
| South America | North-Western | Kogi                      | Yes  | (Reichel-Dolmatoff and Muirden, 1949, pp. 228–229)                                                | EA     |
| South America | North-Western | Goajiro                   | Yes  | (Gutiérrez de Pineda and Muirden, 1950, pp. 83; 86; 92; 108)                                      | SCCS   |
| South America | Southern      | Abipón                    | Yes  | (Dobrizhoffer, 1822, pp. 138; 213)                                                                | SCCS   |
| South America | Southern      | Chorote                   | Yes? | (Rosen, 1924, p. 159)                                                                             | EA     |
| South America | Southern      | Enxet and Enlhet (Lengua) | Yes  | (Grubb and Morrey, 1911, pp. 215–216; Loewen, 1966, pp. 263–264)                                  | SCCS   |
| South America | Southern      | Tehuelche                 | Yes  | (De Viedma and Muirden, 1837, p. 10)                                                              | SCCS   |
| South America | Southern      | Terena                    | Yes  | (Oberg, 1949, p. 29B)                                                                             | Survey |

\* Geographical and cultural classifications follow the eHRAF World Culture

**Yes?** = Only indirect evidence is available.

**Appendix 11.** Do pairs, at least occasionally, reveal the time and/or location of future matings in a way that may enable others to interrupt the planned mating? (n=43 SCCS/EA cultures).

| <b>Region</b> | <b>Sub-region*</b> | <b>Culture*</b> | <b>Factual concealment?</b> | <b>Examples from principle authority</b>                                 | <b>Sample ((EA) Ethnographic Atlas/ (SCCS) Standard-Cross-Cultural-Sample)</b> |
|---------------|--------------------|-----------------|-----------------------------|--------------------------------------------------------------------------|--------------------------------------------------------------------------------|
| Africa        | Central Africa     | Mbuti           | No                          | (Turnbull, 1965, p. 216)                                                 | SCCS                                                                           |
| Africa        | Central Africa     | Mongo (Nkundu)  | No                          | (Hulstaert and Vizedom, 1938, pp. 73; 214; 287; 338; 456–457)            | SCCS                                                                           |
| Africa        | Central Africa     | Teda            | No                          | (Le Coeur and Schütze, 1950, p. 25)                                      | SCCS                                                                           |
| Africa        | Eastern Africa     | Bena            | No                          | (Culwick et al., 1935, pp. 356; 375–376)                                 | EA                                                                             |
| Africa        | Eastern Africa     | Gikuyu          | No                          | (Kenyatta, 1953, pp. 157–158, 180–182)                                   | SCCS                                                                           |
| Africa        | Eastern Africa     | Maasai          | No                          | (Leakey, 1930, pp. 192–194; Merker, 1910, p. 158; Spencer, 1988, p. 189) | SCCS                                                                           |
| Africa        | Eastern Africa     | Mao             | No                          | (Grottanelli, 1940, p. 254)                                              | SCCS                                                                           |
| Africa        | Eastern Africa     | Shilluk         | No                          | (Seligman and Seligman, 1932, pp. 64; 69)                                | SCCS                                                                           |
| Africa        | Southern Africa    | Ovimbundu       | No                          | (Childs, 1949, p. 113)                                                   | SCCS                                                                           |
| Africa        | Western Africa     | Katab           | No                          | (Meek, 1931, p. 42)                                                      | EA                                                                             |
| Africa        | Western Africa     | Nupe            | No                          | (Nadel, 1954, pp. 82; 110)                                               | EA                                                                             |
| Asia          | Caucasus           | Abkhazian       | Yes                         | (Benet, 1974, p. 86)                                                     | SCCS                                                                           |
| Asia          | Central Asia       | Kazakh          | No                          | (Hudson, 1938, p. 47)                                                    | SCCS                                                                           |
| Asia          | East Asia          | Yi Lolo         | No                          | (Lin and Pan, 1947, p. 67)                                               | SCCS                                                                           |
| Asia          | East Asia          | Manchu          | No                          | (Shirokogorov, 1924, pp. 151–152)                                        | SCCS                                                                           |
| Asia          | North Asia         | Chukchee        | No                          | (Bogoraz-Tan, 1909, pp. 400–401)                                         | SCCS                                                                           |
| Asia          | South-East Asia    | Balinese        | No                          | (Covarrubias, 1938, pp. 150–151)                                         | SCCS                                                                           |
| Asia          | Southeast Asia     | Ifugao          | No                          | (Barton, 1938, pp. 55, 188)                                              | SCCS                                                                           |
| Middle East   | Middle East        | Basseri         | No                          | (Barth, 1961, pp. 141–142)                                               | SCCS                                                                           |

|                                  |                    |                    |     |                                                                        |      |
|----------------------------------|--------------------|--------------------|-----|------------------------------------------------------------------------|------|
| Middle East                      | Middle East        | Kurds              | No  | (Hansen, 1961, pp. 131–134)                                            | SCCS |
| Middle East                      | Middle East        | Turks              | No  | (Makal et al., 1954, pp. 130–131)                                      | SCCS |
| Middle America and the Caribbean | Northern Mexico    | Huichol            | No  | (Lumholtz, 1973, p. 94)                                                | SCCS |
| Oceania                          | Melanesia          | Kapauku            | Yes | (Pospisil, 1978, pp. 75–76, 1958, p. 46)                               | SCCS |
| Oceania                          | Melanesia          | Kimam              | No  | (Serpenti, 1965, p. 167)                                               | SCCS |
| Oceania                          | Melanesia          | Kwoma              | Yes | (Whiting, 1941, p. 127)                                                | SCCS |
| Oceania                          | Melanesia          | Lesu               | No  | (Powdermaker, 1933, pp. 239–240)                                       | SCCS |
| Oceania                          | Melanesia          | Manus              | Yes | (Mead, 1930, pp. 164; 167)                                             | SCCS |
| Oceania                          | Melanesia          | Siwai              | Yes | (Oliver, 1955, p. 144)                                                 | SCCS |
| Oceania                          | Melanesia          | Trobriand          | Yes | (Malinowski, 1929, p. 271)                                             | SCCS |
| Oceania                          | Melanesia          | Wogeo              | No  | (Hogbin, 1945, p. 345)                                                 | EA   |
| Oceania                          | Micronesia         | Chuuk              | Yes | (Bollig, 1927, p. 46; Gladwin and Sarason, 1953, pp. 102; 105–106)     | SCCS |
| Oceania                          | Micronesia         | Marshallese        | Yes | (Erdland and Neuse, 1914, p. 91; 99; Krämer et al., 1938, pp. 274–275) | SCCS |
| Oceania                          | Polynesia          | Marquesas          | No  | (Linton, 1939, pp. 172–173; Suggs, 1963, p. 34)                        | SCCS |
| Oceania                          | Polynesia          | Samoans            | No  | (Holmes, 1958, p. 53; Mead, 1928, p. 136)                              | EA   |
| Oceania                          | Polynesia          | Tongans            | No  | (Gifford, 1929, p. 191)                                                | EA   |
| South America                    | Amazon and Orinoco | Barama River Carib | No  | (Gillin, 1936, p. 72)                                                  | SCCS |
| South America                    | Amazon and Orinoco | Jivaro             | Yes | (Karsten, 1935, p. 216)                                                | SCCS |
| South America                    | Amazon and Orinoco | Mundurucu          | Yes | (Murphy, 1960, pp. 117–118)                                            | SCCS |
| South America                    | Amazon and Orinoco | Nambicuara         | Yes | (Lévi-Strauss and Sittler, 1948, p. 73)                                | SCCS |
| South America                    | Amazon and Orinoco | Saramaka           | No  | (Price, 1993, p. 22)                                                   | SCCS |
| South America                    | Amazon and Orinoco | Sirionó            | No  | (Holmberg, 1946, p. 158)                                               | SCCS |
| South America                    | Eastern            | Canela (Timbira)   | No  | (Crocker, 1990, pp. 281–283; Nimuendaju and Lowie, 1946, p. 104)       | SCCS |

|                                                                            |                   |         |    |                                                    |      |
|----------------------------------------------------------------------------|-------------------|---------|----|----------------------------------------------------|------|
| South<br>America                                                           | North-<br>Western | Goajiro | No | (Gutiérrez de Pineda and Muirden,<br>1950, p. 133) | SCCS |
| * Geographical and cultural classifications follow the eHRAF World Culture |                   |         |    |                                                    |      |

## References

- Abelove, J.M., 2000. Pre-Verbal Learning Of Kinship Behavior Among Shipibo Infants Of Eastern Peru. University Microfilms International, Ann Arbor, Mich.
- Aberle, D.F., 1951. Psychosocial Analysis Of A Hopi Life-History, in: Comparative Psychology Monographs. University of California Press, Berkeley And Los Angeles.
- Abu-Laban, B., 1980. Olive Branch On The Family Tree: The Arabs In Canada, in: Generations, A History Of Canada'S Peoples. McClelland and Stewart, Toronto.
- Achor, S., 1978. Mexican Americans In A Dallas Barrio. University of Arizona Press, Tucson.
- Ajisafe, A.K., 1924. Laws And Customs Of The Yoruba People. George Routledge & Sons, Ltd, London.
- Albert, E.M., 1963. Women Of Burundi: A Study Of Social Values, in: Palume, D. (Ed.), Women Of Tropical Africa. Routledge & Kegan Paul, London.
- Altman, I., Ginat, J., 1996. Polygamous Families In Contemporary Society. Cambridge University Press, Cambridge.
- Altschuler, M., 1965. Cayapa: A Study In Legal Behavior. Ann Arbor: University Microfilms.
- Ammār, H., 1954. Growing Up In An Egyptian Village: Silwa, Province Of Aswan International Library Of Sociology And Social Reconstruction. Routledge and Kegan Paul Ltd, London.
- Appell, G., 1991. Individuation Of The Drives Of Sex And Aggression In The Linguistic And Behavioral Repertoire Of The Rungus, in: Female And Male In Borneo :

- Contributions And Challenges To Gender Studies, Borneo Research Council  
Monograph Series. Borneo Research Council, Williamsburg, Va, Usa, pp. 57–120.
- Appell, G.N., 1965. Nature Of Social Groupings Among The Rungus Dusun Of Sabah, Malaysia. [s.n.], [S.L.].
- Appell, G.N., Appell, L.W.R., 1993. To Converse With The Gods: The Rungus Bobolizan - Spirit Medium And Priestess, in: Seen And The Unseen: Shamanism, Mediumship And Possession In Borneo, Borneo Research Council Monograph Series. Borneo Research Council, Williamsburg, Va., pp. 3–53.
- Archer, W.G., 1984. Tribal law and justice: a report on the Santal. Concept, New Delhi.
- Archer, W.G., 1974. The hill of flutes: life, love, and poetry in tribal India: a portrait of the Santals. University of Pittsburgh Press, Pittsburgh.
- Arensberg, C.M., Kimball, S.T., 1940. Family And Community In Ireland. Harvard University Press, Cambridge, Mass.
- Aschwanden, H., Cooper, U., 1987. Symbols of death: an analysis of the consciousness of the Karanga, in: Shona Heritage Series. Mambo Press, Gweru, Zimbabwe.
- Aschwanden, H., Cooper, U., 1982. Symbols of life: an analysis of the consciousness of the Karanga, in: Shona Heritage Series. Mambo Press, Gweru, Zimbabwe.
- Aubaret, L.G.G., Howard, G.P., 1865. Annamite code: laws and regulations of the Kingdom of Annam, Vol. 1. Imprimerie Impériale, Paris.
- Bagshawe, F.J., 1925. Peoples Of The Happy Valley (East Africa): The Aboriginal Races Of Kondoa Irangi: Part Ii -- The Kangeju. J. African Soc. Vol. 24, 117–130.
- Bailey, F.L., 1950. Some Sex Beliefs And Practices In A Navaho Community: With Comparative Material From Other Navaho Areas, in: Reports Of The Ramah

Project. The Museum, Cambridge.

Bailey, J., 1863. Account Of The Wild Tribes Of The Veddahs Of Ceylon: Their Habits, Customs, And Superstitions, in: Transactions, N.S 2. London, pp. 278–320.

Baldus, H., Lillios, I., 1937. Social Position Of The Woman Among The Eastern Bororo, in: Ensaios De Etnologia Brasileira, Brasiliana. Companhia Editora Nacional, Sao Paulo, Brazil, pp. 112–162, 323-330 , 16 plates (9-24).

Baniel, A., Cowlshaw, G., Huchard, E., 2018. Jealous females? Female competition and reproductive suppression in a wild promiscuous primate. Proc. R. Soc. B Biol. Sci. 285.

Baniel, A., Delaunay, A., Cowlshaw, G., Huchard, E., 2019. Oestrous females avoid mating in front of adult male bystanders in wild chacma baboons. R. Soc. Open Sci. 6. <https://doi.org/10.1098/rsos.181009>

Bar Ziv, E., 2013. A matter of choice: Mating strategies and decision-making system of mate choice in rock hyrax (*Procavia capensis*). MSc thesis, Tel-Aviv Univ. <https://doi.org/10.2307/3503802>

Bar Ziv, E., Ilany, A., Demartsev, V., Barocas, A., Geffen, E., Koren, L., 2016. Individual, social, and sexual niche traits affect copulation success in a polygynandrous mating system. Behav. Ecol. Sociobiol. 70, 901–912. <https://doi.org/10.1007/s00265-016-2112-4>

Barker, J., Muirden, S., 1959. Raids Among The Waica. Boletín Indig. Venez. 7, 151-167 [HRAF ms.: 1–18 ].

Barnett, H.G., 1963. Being A Palauan, in: Case Studies In Cultural Anthropology. Holt, Rinehart and Winston, New York.

- Barnett, H.G., 1949. Palauan Society: A Study Of Contemporary Native Life In The Palau Islands. University of Oregon Publications, Eugene, Ore.
- Barnett, W.K., 1971. Ethnographic Description Of Sanlei Ts'Un, Taiwan, With Emphasis On Women's Roles: Overcoming Research Problems Caused By The Presence Of A Great Tradition. University Microfilms, Ann Arbor, Mich.
- Barth, F., 1961. Nomads Of South-Persia: The Basseri Tribe Of The Khamseh Confederacy. Humanities Press, Oslo.
- Barton, R.F., 1938. Philippine Pagans: The Autobiographies Of Three Ifugaos. George Routledge & Sons, London.
- Barton, R.F., 1919. Ifugao Law, in: Publications In American Archaeology And Ethnology. University of California Press, Berkeley.
- Batchelor, J., 1927. Ainu Life And Lore: Echoes Of A Departing Race. Kyobunkwan, Tokyo.
- Bauer, M.C., 1985. Navajo Conflict Management. University Microfilms International, Ann Arbor, Mich.
- Beardsley, R.K., Hall, J.W., Ward, R.E., 1972. Village Japan. University of Chicago Press, Chicago.
- Beattie, J.H.M., 1958. Nyoro Marriage And Affinity. Africa (Lond). 28, 1–22.
- Becher, H., Schütze, F., 1960. Surara And Pakidai, Two Yanoama Tribes In Northwest Brazil, in: Mitteilungen. Kommissionsverlag Cram, De Gruyter & Co., Hamburg, pp. 1–133.
- Behrens, C.A., 1988. Time Allocation Among The Shipibo Of Nuevo Eden, in: Cross-Cultural Studies In Time Allocation. Human Relations Area Files, New Haven,



Conn.

- Bell, C.A., 1928. People Of Tibet. Clarendon Press, Oxford, England.
- Ben Mocha, Y., Mundry, R., Pika, S., 2018. Why hide? Concealed sex in dominant Arabian babblers (*Turdoides squamiceps*) in the wild. *Evol. Hum. Behav.* 39, 575–582. <https://doi.org/10.1016/j.evolhumbehav.2018.05.009>
- Bénard, C. b., Messner, C.A., 1921. Samoyed, in: Samoyédes, Un Été Chez Les. Plon-Nourrit et Cie, Paris.
- Benet, S., 1974. Abkhasians: The Long-Living People Of The Caucasus, in: Case Studies In Cultural Anthropology. Rinehart and Winston, New York: Hol.
- Benhazera, M., Coleman, A.R., 1908. Six Months Among The Ahaggar Tuareg. Typographie Adolphe Jourdan, Algeria.
- Bennett, W.C., Zingg, R.M., 1935. Tarahumara: An Indian Tribe Of Northern Mexico. Ethnological Series. The University of Chicago Press., Chicago, Illinois.
- Berard, J.D., Nurnberg, P., Epplen, J.T., Schmidtke, J., 1994. Alternative Reproductive Tactics and Reproductive Success in Male Rhesus Macaques. *Behaviour* 129, 177–201.
- Bergman, R.W., 1980. Amazon Economics: The Simplicity Of Shipibo Indian Wealth, in: Dellplain Latin American Studies. Published for Dept. of Geography, Syracuse University by University Microfilms International, Ann Arbor, Mich.
- Best, E., 1924. The Maori: volume 1, in: Memoirs Of The Polynesian Society. Wellington, N.Z.
- Bhattacharyya, B., 1976. Attitudes Of Modernity Among Urban Females In Bengal, in: Bengal : Studies In Literature, Society And History, South Asia Series. Asian

- Studies Center, Michigan State University, East Lansing, Mich., pp. 121–127.
- Birket-Smith, K., 1953. Chugach Eskimo, in: Nationalmuseets Skrifter. Etnografisk Række. Nationalmuseets publikationsfond, Kobenhavn.
- Birkhead, T.R., Clarkson, K., Zann, R., 1988. Extra-pair Courtship, Copulation and Mate Guarding in Wild Zebra Finches *Taeniopygia guttata*. Anim. Behav. 36, 1853–1855.
- Biswas, P.C., 1956. Santals of the Santal Parganas. Bharatiya Adimjati Sevak Sangh, Delhi.
- Black, L., 1973. Nivkh (Gilyak) Of Sakhalin And The Lower Amur. Arctic Anthropol. Vol. 10.
- Blackwood, B., 1935. Both Sides Of Buka Passage: An Ethnographic Study Of Social, Sexual, And Economic Questions In The North-Western Solomon Islands. Clarendon Press, Oxford.
- Bloomfield, S.F., 2002. Illness and cure in Tonga: Traditional and modern medical practice. Vava'u Press, Nuku'Alofa, Tonga.
- Boehm, C., 1984. Blood Revenge: The Anthropology Of Feuding In Montenegro And Other Tribal Societies. University Press of Kansas, Lawrence, Kan.
- Bogoraz-Tan, W., 1909. Chukchee: Material Culture [Part 1], Religion [Part 2], Social Organization [Part 3], in: Memoirs. E. J. Brill, Ltd. ; G. E. Stechert and Co., Leiden.
- Bolinder, G., 1957. Indians On Horseback. Dennis Dobson, London.
- Bollig, L., 1927. Inhabitants Of The Truk Islands: Religion, Life And A Short Grammar Of A Micronesian People. Aschendorff, Munster I W.
- Boone, M.S., 1989. Capital Cubans: Refugee Adaptation In Washington, D.C., in: Immigrant Communities & Ethnic Minorities In The United States & Canada. AMS

- Press, New York.
- Borges, D.E., 1994. *Family In Bahia, Brazil, 1870-1945*. Stanford University Press, Stanford, Calif.
- Boswell, T.D., Curtis, J.R., 1984. *Cuban-American Experience: Culture, Images, And Perspectives*. Rowman & Allanheld, Totowa, New Jersey.
- Bourgois, P.I., 1996a. In Search Of Respect: Selling Crack In El Barrio, in: *Structural Analysis In The Social Sciences*. Cambridge University Press, Cambridge.
- Bourgois, P.I., 1996b. In Search Of Masculinity: Violence, Respect And Sexuality Among Puerto Rican Crack Dealers In East Harlem. *Br. J. Criminol.* Vol. 36, 412–427.
- Brasseaux, C.A., 1987. *Founding Of New Acadia: The Beginnings Of Acadian Life In Louisiana, 1765-1803*. Louisiana State University Press, Baton Rouge, La.
- Breton, R., McKusick, M.B., Verin, P., 1665. *Carib-French Dictionary*. Par Gilles Bovqvét, A Avxerre.
- Bringa, T., 1995. *Being Muslim the Bosnian Way: Identity and Community in a Central Bosnian Village*, Princeton Studies In Muslim Politics. Princeton University Press, Princeton, New Jersey. <https://doi.org/10.2307/3317709>
- Broude, G.J., Greene, S.J., 1976. Cross-Cultural Codes on Twenty Sexual Attitudes and Practices. *Ethnology* 15, 409–429.
- Buck, P.H., 1957. *Arts And Crafts Of Hawaii*, in: Special Publication. Bishop Museum Press, Honolulu.
- Buck, P.H., 1952. *Coming Of The Maori*. Maori Purposes Fund Board, Wellington.
- Bullock, C., 1950. *The Mashona and the Matabele*. Juta & Co., Cape Town.

- Burkart, J.M., van Schaik, C.P., 2010. Cognitive consequences of cooperative breeding in primates? *Anim. Cogn.* 13, 1–19. <https://doi.org/10.1007/s10071-009-0263-7>
- Campbell, C.J., Gibson, K.N., 2008. Spider monkey reproduction and sexual behaviour, in: Campbell, C.J. (Ed.), *Spider Monkeys: Behavior, Ecology and Evolution of the Genus Ateles*. Cambridge University Press, Cambridge, pp. 266–287.
- Campbell, J.K., 1970. Honour And The Devil, in: *Honor And Shame: The Values Of Mediterranean Society, Nature Of Human Societies*. University of Chicago Press, Chicago, pp. 141–170.
- Campbell, J.K., 1964. *Honour, Family And Patronage: A Study Of Institutions And Moral Values In A Greek Mountain Community*. Clarendon Press, Oxford.
- Campisi, P.J., 1958. Italian Family In The United States, in: *Social Perspectives On Behavior*. Free Press, Glencoe, Illinois, pp. 76-81,620.
- Cant, M.A., 2003. Patterns of helping effort in co-operatively breeding banded mongooses (*Mungos mungo*). *J. Zool.* 259, 115–121.  
<https://doi.org/10.1017/S0952836902003011>
- Cant, M.A., 2000. Social control of reproduction in banded mongooses. *Anim. Behav.* 59, 147–158. <https://doi.org/10.1006/anbe.1999.1279>
- Carcopino, J., Rowell, H.T., Lorimer, E.O., 1940. *Daily Life In Ancient Rome: The People And The City At The Height Of The Empire*. Yale University Press, New Haven, Conn.
- Carter, R.M., 1989. Chipewyan semantics: form and meaning in the language and culture of an Athapaskan-speaking people of Canada, in: *Publications. Xerox University Microfilms*, Ann Arbor, Mich.

- Chagnon, N.A., 1968. Yanomamö: The Fierce People, in: Case Studies In Cultural Anthropology. Holt, Rinehart and Winston, New York.
- Chagnon, N.A., 1967. Yanomamö Warfare, Social Organization And Marriage Alliances. University Microfilms, Ann Arbor, Mich.
- Chang, K., Chang, P., Yin-t'ang, C., Cheney, G., Crawford, R., Hsiung, H., Hsü, P., Lagaweir, E., Lo, J.P., Mann, A., Miller, R., Mostaert, A., Myers, R., Posch, U., Shih, Y.C., Wang, F., Wong, G., Yang, M., 1956. Regional Handbook Of The Inner Mongolia Autonomous Region, HREAF Subcontractor's Monograph. Human Relations Area Files, New Haven, Conn.
- Chapelle, J., Schütze, F., 1957. Black Nomads Of The Sahara. Librairie Plon, Paris.
- Chen, H., 1992. Chinatown No More: Taiwan Immigrants In Contemporary New York, in: Anthropology Of Contemporary Issues. Cornell University Press, Ithaca, N.Y.
- Childs, G.M., 1949. Umbundu Kinship & Character: Being A Description Of Social Structure And Individual Development Of The Ovimbundu Of Angola, With Observations Concerning The Bearing On The Enterprise Of Christian Missions Of Certain Phases Of The Life And Culture Describe. Published for the International African Institute by the Oxford University Press, London.
- Clercq, L.C., Ganong, W.F., 1910. New Relation Of Gaspesia: With The Customs And Religion Of The Gaspesian Indians. The Champlain Society, Toronto.
- Colson, A.B., 1952. Nilotes Of The Anglo-Egyptian Sudan And Uganda, in: Ethnographic Survey Of Africa; East Central Africa. International African Institute, London, pp. 45–67.
- Connor, R.C., Smolker, R.A., Richards, A.F., 1992. Two levels of alliance formation

- among male bottlenose dolphins (*Tursiops* sp.). Proc. Natl. Acad. Sci. 89, 987–990.  
<https://doi.org/10.1073/pnas.89.3.987>
- Cook, W.A., 1909. Through The Wilderness Of Brazil By Horse, Canoe And Float. American Tract Society, New York.
- Coon, C.S., 1931. Tribes Of The Rif. Harvard African Studies. Peabody Museum of Harvard University, Cambridge, Mass.
- Cornell, J.B., 1953. Matsunagi: The Life And Social Organization Of A Japanese Mountain Community. University Microfilms International, Ann Arbor, Mich.
- Covarrubias, M., 1938. Island Of Bali. Alfred A. Knopf, New York.
- Creel, M.W., 1988. “A Peculiar People”: Slave Religion And Community-Culture Among The Gullahs. New York University Press, New York.
- Creel, S., Creel, N., Wildt, D.E., Monfort, S.L., 1992. Behavioural and endocrine mechanisms of reproductive suppression in Serengeti dwarf mongooses. Anim. Behav. 43, 231–245. [https://doi.org/10.1016/S0003-3472\(05\)80219-2](https://doi.org/10.1016/S0003-3472(05)80219-2)
- Crocker, W.H., 1990. Canela (Eastern Timbira), I: An Ethnographic Introduction, in: Smithsonian Contributions To Anthropology. Smithsonian Institution Press, Washington.
- Culshaw, W.J., 1949. Tribal heritage: a study of the Santals, in: Missionary Research Series. Lutterworth Press, London.
- Culwick, A.T., Culwick, G.M., Kiwanga, T., 1935. Ukena Of The Rivers. G. Allen & Unwin, Ltd., London.
- Daly, M., Wilson, M., Weghorst, S.J., 1982. Male Sexual Jealousy. Ethol. Sociobiol. 3, 11–27.

- Damon, F.H., 1990. From Muyuw To The Trobriands: Transformations Along The Northern Side Of The Kula Ring. University of Arizona Press, Tucson, Arizona.
- Damon, F.H., 1983. On The Transformation Of Muyuw Into Woodlark Island: Two Minutes In December, 1974. *J. Pac. Hist.* xviii, 35–56.
- Davenport, W., 1969. Social Organization Notes On The Northern Santa Cruz Islands: The Main Reef Islands, in: Baessler-Archiv; Beiträge Zur Völkerkunde. Berlin, pp. 151–243.
- Davies, N.B., 1983. Polyandry, cloaca-pecking and sperm competition in dunnocks. *Nature* 302, 334–336. <https://doi.org/10.1038/302334a0>
- Davies, N.B., Hartley, I.R., Hatchwell, B.J., Langmore, N.E., 1996. Female control of copulations to maximize male help: a comparison of polygynandrous alpine accentors, *Prunella collaris*, and dunnocks, *P. modularis*. *Anim. Behav.* 51, 27–47. <https://doi.org/10.1006/anbe.1996.0003>
- Davis, A., Dollard, J., 1958. Children Of Bondage: The Personality Development Of Negro Youth In The Urban South. American Council on Education, Washington, D.C.
- Davis, L.S., 1982. Copulatory behavior of Richardson’s ground squirrels (*Spermophilus richardsonii*) in the wild. *Can. J. Zool.* 60, 2953–2955. <https://doi.org/10.1139/z82-373>
- De Viedma, A., Muirden, S.J., 1837. Description Of Patagonia, in: De Angelis, P. (Ed.), Coleccion De Obras Y Documentos Relativos A La Historia Antiqua Y Moderna De Las Provincias Del Rio De La Plata. Imprenta del Estado, Buenos Aires.
- De Vos, G.A., 1973. Social Values And Personal Attitudes In Primary Human Relations

- In Rural Japan, in: *Socialization For Achievement : Essays On The Cultural Psychology Of The Japanese*. University of California Press, Berkeley, pp. 61–109.
- De Vos, G.A., Wagatsuma, H., 1961. Value Attitudes Toward Role Behavior Of Women In Two Japanese Villages. *Am. Anthropol.* Vol. 63, 1204–1230.
- Deacon, B., Wedgwood, C., 1934. *Malekula: A Vanishing People In The New Hebrides*. George Routledge and Sons, London.
- Decroos, J.F., 1983. *Long Journey: Social Integration And Ethnicity Maintenance Among Urban Basques In The San Francisco Bay Region*. Associated Faculty Press, Inc. Basque Studies Program, University of Nevada, [Tarrytown, N.Y.].
- Del Valle, T., Apalategi, Joxemartin Aretxaga, B., Arregui, B., Babace, I., Díez, M.C., Larrañaga, C., Oiarzabal, A., Pérez, C., Zuriarrain, I., 1985. *Mujer Vasca: Imagen Y Realidad*, in: *Autores, Textos Y Temas De Antropologi*. Anthropos, Barcelona.
- Dempsey, J., 1955. *Mission On The Nile*. Burns & Oates, London.
- Dennis, W., 1940. *Hopi Child*. D. Appleton-Century Company, Incorporated, for the Institute for Research in the Social Sciences, University of Virginia, New York.
- Diamond, N., 1969. *K'Un Shen: A Taiwan Village*. Holt, Rinehart and Winston, New York.
- Dickson, H.R.P., 1951. *Arab Of The Desert: A Glimpse Into Badawin Life In Kuwait And Sau'di Arabia*. George Allen & Unwin Ltd, London.
- Digby, L.J., Ferrari, S.F., Saltzman, W., 2006. *Callitrichines: The Role of Competition in Cooperatively Breeding Species*, in: *Primates in Perspective*. Oxford University Press, New York, pp. 85–106.
- Dobrizhoffer, M., 1822. *Account Of The Abipones, An Equestrian People Of Paraguay*:



Volume 2. John Murray, London.

Douglass, W.A., 1969. Death In Murelaga: Funerary Ritual In A Spanish Basque Village.

Monographs. University of Washington, Seattle.

Du Bois, C.A., Kardiner, A., Oberholzer, E., 1944. People Of Alor: A Social-

Psychological Study Of An East Indian Island. Univ. of Minnesota Press,  
Minneapolis.

Du Tertre, J.B.M., Bassford, M., Verin, P., 1667. Concerning The Natives Of The

Antilles, in: General History Of The Antilles Occupied By The French. T. Iolly,  
Paris.

Dube, S.C., 1955. Indian Village. Cornell University Press, Ithaca, N.Y.

Ducey, P.R., 1971. Cultural Continuity And Population Change On The Isle Of Skye.

University Microfilms., Ann Arbor, Michigan.

Durán, D.D., 1975. Book Of The Gods And Rites And The Ancient Calendar Civilization

Of The American Indian Series. University of Oklahoma Press, Norman.

Durán, D.D., 1964. Aztecs: The History Of The Indies Of New Spain. Orion Press, New

York.

Durham, M.E., 1928. Some Tribal Origins, Laws, And Customs Of The Balkans. George

Allen and Unwin, London.

Dyk, W., 1951. Notes And Illustrations Of Navaho Sex Behavior, in: Psychoanalysis And

Culture. International Universities Press, New York.

Eakin, L., Lauriault, E., Boonstra, H., Ballena Dávila, M., 1980. Bosquejo Etnográfico

De Los Shipibo-Conibo Del Ucayali. I. Prado Pastor, Lima.

Ebihara, M., 1971. Svay: A Khmer Village In Cambodia. University Microfilms, Ann

Arbor, Mich.

Ebihara, M., Matthiasson, C.J., 1974. Khmer Village Women In Cambodia: A Happy Balance, in: *Many Sisters; Women In Cross-Cultural Perspective*. Free Press, New York, pp. 305–347.

Edwards, A.C., 1962. Ovimbundu Under Two Sovereignities: A Study Of Social Control And Social Change Among A People Of Angola. Published for the International African Institute by the Oxford University Press, London.

eHRAF World Cultures [WWW Document], 1949. URL

<http://ehrafworldcultures.yale.edu/ehrafe/>

Elmendorf, M.L., 1976. Nine Mayan Women: A Village Faces Change. Schenkman Pub. Co., Cambridge, Mass.

Elwin, V., 1947. The Muria and their ghotul. Oxford University Press, Oxford.

Elwin, V., 1943. Maria Murder And Suicide. Pub. for Man in India by H. Milford, Oxford University Press, Bombay.

Emley, E.D., 1927. Turkana Of Kolosia District. J. Gt. Britain Irel. Vol. 57, 157–201.

Engh, A.L., Funk, S.M., Van Horn, R.C., Scribner, K.T., Bruford, M.W., Libants, S., Szykman, M., Smale, L., Holekamp, K.E., 2002. Reproductive skew among males in a female-dominated mammalian society. *Behav. Ecol.* 13, 193–200.

<https://doi.org/10.1093/beheco/13.2.193>

Erdland, A., Neuse, R., 1914. Marshall Islanders: Life And Customs, Thought And Religion Of A South Seas People, in: *Anthropos Bibliothek Ethnological Monographs*. [s.n.], Münster I. W.

Evans-Pritchard, E.E., 1962. Sanza, A Characteristic Feature Of Zande Language And

- Thought, in: *Essays In Social Anthropology*. Faber and Faber, London, pp. 204–228.
- Evans-Pritchard, E.E., 1928. Dance, in: *Africa*. Oxford University Press, London, pp. 446–462.
- Faron, L.C., 1961. Mapuche Social Structure: Institutional Reintegration In A Patrilineal Society Of Central Chile, in: *Illinois Studies In Anthropology*. The University of Illinois Press, Urbana.
- Feuchtwang, S., 1974. Domestic And Communal Worship In Taiwan, in: *Religion And Ritual In Chinese Society*. Stanford University Press, Stanford, Calif., pp. 105-129, 355-356.
- Fife, A.E., Fife, A.S., 1966. *Saints Of Sage & Saddle: Folklore Among The Mormons*. Peter Smith, Gloucester, Mass.
- Finerman, R., 2004. Saraguros, in: *Encyclopedia Of Medical Anthropology : Health And Illness In The World's Cultures*. Kluwer Academic/Plenum Publishers, New York, pp. 937–947.
- Firth, R.W., 1959. *Economics of the New Zealand Maori*, 2nd ed. Wellington, N.Z.
- Fischer, A.M., 1950. Role Of Trukese Mother And Its Effect On Child Training, in: *Scientific Investigation Of Micronesia*. Pacific Science Board, Washington, D.C., p. 148.
- Force, R.W., Force, M., 1972. Just One House: A Description And Analysis Of Kinship In The Palau Islands, in: *Bernice P. Bishop Museum Bulletin*. Bishop Museum Press, Honolulu, Hawaii, pp. 20–143.
- Ford, C.S., Beach, F.A., 1951. *Patterns of Sexual Behavior*. Eyre & Spottiswoode, London.

- Fortes, M., 1949. *Web Of Kinship Among The Tallensi: The Second Part Of An Analysis Of The Social Structure Of A Trans-Volta Tribe*. Oxford University Press for the International African Institute, London.
- Fortune, R., Council, A.N.R., 1935. *Manus Religion: An Ethnological Study Of The Manus Natives Of The Admiralty Islands* *Memoirs Of The American Philosophical Society*, in: *Memoirs Of The American Philosophical Society*. The American Philosophical Society, Philadelphia.
- Fox, M.J.T., 2003. Cherokee, in: *Encyclopedia of Sex and Gender: Men and Women in the World's Cultures*. Kluwer Academic/Plenum Publishers, New York, pp. 356–363.
- Fox, R. 1995, 1995. *The Tory Islanders: A People Of The Celtic Fringe*. University of Notre Dame Press., Notre Dame.
- Fried, J., 1951. *Ideal Norms And Social Control In Tarahumara Society*. Yale University, New Haven, Conn.
- Friedl, E., 1997. *Children of Deh Koh: young life in an Iranian village*, *Choice Reviews Online*. Syracuse University Press, Syracuse, N.Y.  
<https://doi.org/10.5860/choice.35-5156>
- Friedl, E., 1994. Sex The Invisible. *Am. Anthropol.* 96, 833–844.
- Fruzzetti, L., 1982. *Gift Of A Virgin: Women, Marriage, And Ritual In A Bengali Society*. Rutgers University Press, New Brunswick, N.J.
- Furst, P.T., 1967. Huichol Conceptions Of The Soul. *Folk. Am.* 27, 39–106.
- Gabb, W.M., 1876. On The Indian Tribes And Languages Of Costa Rica. *Proc. Am. Philos. Soc.* 14, 483–602.

- Gallin, B., 1966. Hsin Hsing, Taiwan: A Chinese Village In Change. University of California Press, Berkeley.
- Gayton, A.H., 1948. Yokuts And Western Mono Ethnography: Vol. 1, Tulare Lake, Southern Valley, And Central Foothill Yokuts. Anthropological Records. Univ. of California Press, Berkeley.
- Geddes, A., 1955. Isle Of Lewis And Harris: A Study In British Community. At the University Press., Edinburgh.
- Geertz, H., 1961. Javanese Family: A Study Of Kinship And Socialization. Free Press of Glencoe, New York.
- Gelfand, M., 1979. Growing up in Shona society: from birth to marriage. Mambo Press, Gwelo, Rhodesia.
- Gelfand, M., Hannan, M., 1968. African crucible: an ethico-religious study with special reference to the Shona-speaking people. Juta & Co., Cape Town.
- Gibson, K.N., 2010. Male Mating Tactics in Spider Monkeys: Sneaking to Compete. *Am. J. Primatol.* 72, 794–804. <https://doi.org/10.1002/ajp.20835>
- Gifford, E.W., 1929. Tongan Society. The Museum, Honolulu, Hawaii.
- Gilbert, W.H., 1978. The eastern Cherokees, in: *Bulletin: Anthropological Papers*. AMS Press, New York, pp. 169–413.
- Gilliland, M.K., 1986. Maintenance of Family Values In A Yugoslav Town. University Microfilms International, Ann Arbor, Michigan.
- Gillin, J., 1936. Barama River Caribs Of British Guiana. *Papers Of The Peabody Museum Of American Archaeology And Ethnology*. The Museum, Cambridge, Mass.

- Gladwin, T., Sarason, S.B., 1953. Truk: Man In Paradise, in: Viking Fund Publications In Anthropology. Wenner-Gren Foundation for Anthropological Research, New York, p. 655.
- Gluckman, M., 1958. Kinship And Marriage Among The Lozi Of Northern Rhodesia And The Zulu Of Natal, in: African Systems Of Kinship And Marriage. Oxford University Press, published for the International African Institute, London, England, pp. 166–206.
- Goddard, I., 1978. Delaware, in: Handbook of North American Indians. Northeast, Handbook of North American Indians. Smithsonian Institution : For sale by the Supt. of Docs., U.S. G. P. O., Washington, D. C., pp. 213–239.
- Goldizen, A.W., 1989. Social Relationships in a Cooperatively Polyandrous Group of Tamarins (*Saguinus fuscicollis*). Behav. Ecol. Sociobiol. 24, 79–89.  
<https://doi.org/10.1007/BF00299639>
- Goodenough, W.H., 1949. Premarital Freedom On Truk: Theory And Practice. Am. Anthropol. 51, 615–620.
- Gorer, G., Hutton, J.H., 1938. Himalayan Village: An Account Of The Lepchas Of Sikkim. Michael Joseph, Ltd., London.
- Graebner, F., Schütze, F., 1909. Ethnography Of The Santa Cruz Islands, in: Ethnologica 1. HRAF, .Leipzig, p. ms: 1–212 [Original: 71–184 ].
- Graham, D.C., 1954. Songs And Stories Of The Ch’Uan Miao, in: Miscellaneous Papers. Smithsonian Institution, Washington, D.C.
- Graham, D.C., 1937. Customs Of The Ch’Uan Miao. J. West China Bord. Res. Soc. 9, 13–70.

- Granqvist, H.N., 1947. Birth And Childhood Among The Arabs: Studies In A  
Muhammadan Village In Palestine. Söderström and Co., Helsingfors, Finland.
- Gray, J.P., 1999. A corrected ethnographic atlas. *World Cult.* 10, 24–85.
- Griffin, A.S., Pemberton, J.M., Brotherton, P.N.M., Mcilrath, G., Gaynor, D., Kansky,  
R., Riain, J.O., Clutton-brock, T.H., 2002. A genetic analysis of breeding success in  
the cooperative meerkat (*Suricata suricatta*). *Behav. Ecol.* 14, 472–480.
- Grigson, W.V., Elwin, V., 1949. Maria Gonds Of Bastar. Oxford University Press,  
London.
- Grottanelli, V.L., 1940. Mao, in: *Missione Etnografica Nel Uollega Occidentale*,  
Accademia D'Italia, Rome. Centro Studi Per L'Africa Orientale Italiana. Reale  
Accademia d'Italia, Roma.
- Grubb, W.B., Morrey, H.T., 1911. Unknown People In An Unknown Land: An Account  
Of The Life And Customs Of The Lengua Indians Of The Paraguayan Chaco, With  
Adventures And Experiences During Twenty Years' Pioneering And Exploration  
Amongst Them. Seeley and Co. Limited, London.
- Grühl, M.B., Morrow, I.F.D., Sieveking, L.M., 1884. In The Dominions Of The Divine  
Emperor, in: *Citadel Of Ethiopia: The Empire Of The Divine Emperor*. AMS Press,  
New York.
- Gulliver, P.H., 1951. Preliminary Survey Of The Turkana: A Report Compiled For The  
Government Of Kenya, in: *Communications From The School Of African Studies*.  
University of Cape Town, [Rondebosch, Cape Town].
- Gutiérrez de Pineda, V., Muirden, S.J., 1950. Social Organization In La Guajira. *Revista  
Del Instituto Etnologico Nacional*, Bogota.

- Hallowell, A.I., 1976. Northern Ojibwa Ecological Adaptation And Social Organization, in: Contributions To Anthropology: Selected Papers Of A. Irving Hallowell. University of Chicago Press, Chicago, Illinois.
- Hallpike, C.R., 2008. Konso Of Ethiopia: A Study Of The Values Of An East Cushitic People. Author House, Central Milton Keynes.
- Hambly, W.D., 1934. Ovimbundu Of Angola: Frederick H. Rawson-Field Museum Ethnological Expedition To West Africa, 1929-30. Chicago, Illinois.
- Handy, E.S.C., 1923. Native Culture In The Marquesas. Bulletin.
- Handy, E.S.C., Pukui, M.K., 1972. Polynesian Family System In Ka-'U, Hawai'I. C. E. Tuttle Co., Rutland, Vt.
- Hansen, H.H., 1961. Kurdish Woman's Life: Field Research In A Muslim Society, Iraq. Copenhagen Ethnographic Museum Record. Kobenhavn.
- Harcourt, A.H., Stewart, K.J., 1989. Functions of alliances in contests within wild gorilla groups. Behaviour 109, 176 – 189. <https://doi.org/10.1163/156853989X00213>
- Harcourt, A.H., Stewart, K.J., Fossey, D., 1981. Gorilla reproduction in the wild, in: Graham, C. (Ed.), Reproductive Biology of the Great Apes: Comparative and Biomedical Perspectives. Academic Press, pp. 265–279. <https://doi.org/10.1016/B978-0-12-295020-9.50016-9>
- Harner, M.J., 1973. Jívaro: People Of The Sacred Waterfalls. Anchor Press/Doubleday, New York.
- Harrell, S., 1982. Ploughshare Village: Culture And Context In Taiwan, in: Publications On Asia Of The School Of International Studies, University Of Washington. University of Washington Press, Seattle.



- Hart, C.W.M., Pilling, A.R., 1960. Tiwi Of North Australia, in: Case Studies In Cultural Anthropology. Henry Holt and Company, New York.
- Hart, D.M., 1954. Ethnographic Survey Of The Riffian Tribe Of Aith Wuryaghil. *Tamuda* 2, 51–86.
- Harwood, A., 1987. Rx, Spiritist As Needed: A Study Of A Puerto Rican Community Mental Health Resource, in: Anthropology Of Contemporary Issues Series. Cornell University Press, Ithaca, New York.
- Hasluck, M.M.H., Hutton, J.H., 1954. Unwritten Law In Albania. University Press, Cambridge.
- Heald, S., 1989. Controlling Anger: The Sociology Of Gisu Violence. Manchester University Press, for the International African Institute, Manchester: England.
- Hearne, S., 1958. A journey from Prince of Wales's fort in Hudson's Bay to the Northern Ocean, 1769, 1770, 1771, 1772. Macmillan Co. of Canada, Toronto.
- Hegland, M.E., 2004. Iranians, in: Encyclopedia Of Sex And Gender. Kluwer Academic Plenum Publishers, New York, pp. 518–529.
- Heinen, H.D., 1973. Adaptive Changes In A Tribal Economy: A Case Study Of The Winikina-Warao. University Microfilms, Ann Arbor, Mich.
- Heinsohn, R., Dunn, P., Legge, S., Double, M., 2000. Coalitions of relatives and reproductive skew in cooperatively breeding white-winged choughs. *Proc. R. Soc. B Biol. Sci.* 267, 243–249. <https://doi.org/10.1098/rspb.2000.0993>
- Heizer, R.F., Mills, J.E., Cutter, D.C., 1952. Four Ages Of Tsurai: A Documentary History Of The Indian Village On Trinidad Bay. University of California Press, Berkeley.

- Henry, J., Benedict, R., Kraus, H.F., 1941. *Jungle People: A Kaingang Tribe Of The Highlands Of Brazil*. J. J. Augustin, Locust Valley, New York.
- Henry, J., Coleman, A., 1910. *Soul Of An African People: The Bambara: Their Psychic, Ethical, Religious And Social Life*, in: *Bibliothèque-Anthropos*. Aschendorff, Münster I. W.
- Herskovits, M.J., 1937. *Life In A Haitian Valley*. Alfred A. Knopf, New York.
- Herskovits, M.J., Herskovits, S.F., 1934. *Rebel Destiny: Among The Bush Negroes Of Dutch Guiana*. Whittlesey House, McGraw-Hill Book Company, Inc., New York.
- Herzfeld, M., 1991. Silence, submission, and subversion: toward a poetics of womanhood, in: *Contested Identities: Gender and Kinship in Modern Greece*, Princeton Modern Greek Studies. Princeton University Press, Princeton, N.J., pp. 70–97.
- Herzfeld, M., 1983. Sematic slippage and moral fall: the rhetoric of chastity in rural Greek society. *J. Mod. Greek Stud.* Vol. 1, 161–172.
- Hiebert, P.G., 1971. *Konduru: Structure And Integration In A South Indian Village*. University of Minnesota Press, Minneapolis.
- Hill, K., Hurtado, A.M., 2009. Cooperative breeding in South American hunter-gatherers. *Proc. R. Soc. B Biol. Sci.* 276, 3863–3870. <https://doi.org/10.1098/rspb.2009.1061>
- Hill, W.W., 1938. *Agricultural And Hunting Methods Of The Navaho Indians*. Yale University Press; H. Milford, Oxford University Press, New Haven.
- Hirschon, R., 1989. *Heirs of the Greek catastrophe: the social life of Asia Minor refugees in Piraeus*. Clarendon Press ; Oxford University Press, Oxford.
- Hirschon, R., 1978. Open body/closed space: the transformation of female sexuality, in:

- Defining Females : The Nature of Women in Society. Wiley, New York, pp. 66–88.
- Hobaiter, C., Byrne, R.W., 2012. Gesture use in Consortship: wild chimpanzees' use of gesture for an 'evolutionarily urgent' purpose, in: Pika, S., Liebal, K. (Eds.), *Developments in Primate Gesture Research*. John Benjamins Press, pp. 129–146.
- Hocart, A.M., 1929. Lau Islands, Fiji. Bulletin. Bernice P. Bishop Museum, Honolulu, Hawaii.
- Hockings, P., 1980. Sex and Disease in a Mountain Community. Vikas Publishing Pvt Ltd., Sahibabad, Distt. Ghaziabad. <https://doi.org/10.2307/2756814>
- Hoebel, E.A., 1969. "Keresan Pueblo Law" Law In Culture And Society. Aldine Pub. Co., Chicago.
- Hogbin, H.I., 1946. Puberty to Marriage: A Study of the Sexual Life of the Natives of Wogeo, New Guinea. *Oceania* 16, 185–209.
- Hogbin, H.I., 1945. Marriage In Wogeo, New Guinea. *Oceania* 15, 324–52.
- Hogbin, H.I., 1938. Social Reaction To Crime: Law And Morals In The Schouten Islands, New Guinea. *R. Anthropol. Inst. Gt. Britain Irel.* 68, 223–62 , plates X – XII.
- Hogbin, H.I., 1935. Native Culture Of Wogeo: Report Of Field Work In New Guinea. *Oceania* 5, 308–337.
- Hogg, J.T., 1988. Copulatory tactics in relation to sperm competition in Rocky Mountain bighorn sheep. *Behav. Ecol. Sociobiol.* 22, 49–59.
- Hogg, J.T., 1984. Mating in bighorn sheep: multiple creative male strategies. *Science* (80-. ). 225, 526–529. <https://doi.org/10.1126/science.6539948>
- Hohmann, G., Fruth, B., 2003. Intra- and inter-sexual aggression by bonobos in the

context of mating. Behaviour 140, 1389–1413.

Holekamp, K.E., Sakai, S.T., Lundrigan, B.L., 2007. Social intelligence in the spotted

hyena (*Crocuta crocuta*). Proc. R. Soc. B Biol. Sci. 362, 523–538.

<https://doi.org/10.1098/rstb.2006.1993>

Holmberg, A., 1946. The Siriono: a study of the effect of hunger frustration on the

culture of a semi-nomadic Bolivian Indian society [WWW Document]. URL

<http://ehrafworldcultures.yale.edu/document?id=sf21-002> (accessed 11.11.17).

Holmberg, A.R., 1950. Nomads Of The Long Bow: The Siriono Of Eastern Bolivia, in:

Smithsonian Institution. Institute Of Social Anthropology. U.S. Govt. Print. Off.,

Washington.

Holmes, L.D., 1958. Ta’U: Stability And Change In A Samoan Village. Wellington,

N.Z., The Polynesian Society, Inc.

Honigsmann, J.J., 1954. Kaska Indians: An Ethnographic Reconstruction. Yale University

Press, New Haven, Conn.

Hostetler, J.A., 1980. Amish Society. Johns Hopkins University Press, Baltimore And

London.

Hove, J. van, Crawford, D., 1941. Essay On The Common Law Of Ruanda. M. Hayez,

imprimeur de l’Académie Royale de Belgique, Bruxelles.

Howell, P.P. (Paul P., 1953. Observations On The Shilluk Of The Upper Nile. Customary

Law: Marriage And The Violation Of Rights In Women. Africa (Lond). Vol. 23,

94–109.

Hrdlicka, A., 1975. Anthropology Of Kodiak Island. AMS Press, New York.

Hudson, A.E., 1938. Kazak Social Structure. Yale University Publications In

Anthropology.

Hulstaert, G.E., Vizedom, M.B., 1938. Marriage Among The Nkundu. Librairie Falk fils, Georges Van Campenhout, Successeur, Bruxelles.

Huntingford, G.W.B., 1955. Kingdom Of Kafa. Galla Of Ethiopia: The Kingdoms Of Kafa And Janjero. International African Institute, London.

Huntingford, G.W.B., 1954. Political Organization Of The Dorobo. *Anthropos* 49, 123–148.

Huntingford, G.W.B., 1953. Southern Nilo-Hamites, in: *Ethnographic Survey Of Africa; East Central Africa*. International African Institute, London.

Huntingford, G.W.B., 1951. Social Institutions Of The Dorobo. *Anthropos* 46, 1–48.

Hutchinson, H.W., 1957. Village And Plantation Life In Northeastern Brazil. University of Washington Press, Seattle.

Innokentii, M. of M., Kolomna, S., Kompaniia, R., B., K., Kardinelowska, A., 1840a. Notes On The Islands Of The Unalaska District. Russian-American Company, St. Petersburg.

Innokentii, M. of M., Saint, K., Keen, B., Kardinelowska, A., 1840b. Notes On The Athin Aleuts And The Koloshi. Russian-American Company, St. Petersburg.

Iossifides, A.M., 1991. Sisters in Christ: metaphors of kinship among Greek nuns, in: *Contested Identities : Gender and Kinship in Modern Greece*, Princeton Modern Greek Studies. Princeton University Press, Princeton, N.J., pp. 135–155.

Itkonen, T.I., Guemati, O., Perez-Roman, E., 1948. Lapps In Finland Up To 1945. Vol. 2. Werner Söderström Osakeyhtiö, Porvoo, Helsinki.

Jabbara, N.W., 1991. Household And Family Among Lebanese Immigrants In Nova

- Scotia: Continuity, Change And Adaption. J. Comp. Fam. Stud. Vol. 22, 39–56.
- Janson, C.H., 1986. Capuchin Counterpoint. Nat. Hist. 95, 44–53.
- Janson, C.H., 1984. Female choice and mating system of the brown capuchin monkey, *Cebus apella* (primates: Cebidae). Z. Tierpsychol. 65, 177–200.
- <https://doi.org/10.1111/j.1439-0310.1984.tb00098.x>
- Jochelson, W., 1905. Koryak, in: Publications Of The Jesup North Pacific Expedition. E. J. Brill ; G. E. Stechert, Leiden.
- John, D.P. St., 1994. Dream-Vision Experience Of The Iroquois: Its Religious Meaning. University Microfilms International, Ann Arbor, Michigan.
- Johnson, G.G., 1930. Social History Of The Sea Islands: With Special Reference To St. Helena Island, South Carolina. University of North Carolina Press, Chapel Hill, N.C.
- Joseph, A., Spicer, B.R., Chesky, J., 1949. Desert People: A Study Of The Papago Indians [Indian Education Research Series]. The University of Chicago Press, Chicago, Illinois.
- Kagwa, S.A., Kalibala, E.B., Edel, M. (Mandelbaum), Roscoe, J., 1934. Customs Of The Baganda. Contributions To Anthropology. Columbia University Press, New York.
- Karras, R.M., 1992. Servitude And Sexuality In Medieval Iceland, in: From Sagas To Society: Comparative Approaches To Early Iceland. Hisarlik Press, Enfield Lock, Middlesex, Uk.
- Karsten, R., 1935. Head-Hunters Of Western Amazonas: The Life And Culture Of The Jibaro Indians Of Eastern Ecuador And Peru. Commentationes Humanarum Litterarum. Centraltryckeriet, Helsingfors.

- Kavvadias, G. V, Schütze, F., 1965. Mediterranean pastoral nomads: the Sarakatsani of Greece, in: Collection Sciences Humaines Appliquées. Gauthier-Villars, Paris.
- Keane, B., Waser, P.M., Creel, S.R., Creel, N.M., Elliott, L.F., Minchella, D.J., 1994. Subordinate reproduction in dwarf mongooses. *Anim. Behav.* 47, 65–75.  
<https://doi.org/10.1006/anbe.1994.1008>
- Kennedy, R., 1986. Women's friendships on Crete: a psychological perspective, in: *Gender & Power in Rural Greece*. Princeton University Press, Princeton, N.J., pp. 121–138.
- Kenyatta, J., 1953. Facing mount Kenya: The Traditional Life of the Gikuyu. Secker and Warburg, London.
- Kharuzin, A.N., 1898. Juridicial Customs Of The Yakut. *Etnogr. Obozr.* 10, 37–64.
- Kidd, S.W., 1999. Love And Hate Among The People Without Things: The Social And Economic Relations Of The Enxet People Of Paraguay.
- Kiev, A., 1968. Curanderismo; Mexican-American Folk Psychiatry. Free Press, New York.
- Kinietz, W.V. (William V., 1946. Delaware culture chronology, in: *Prehistory Research Series*. Indiana Historical Society, Indianapolis.
- Klineberg, O., 1934. Notes On The Huichol. *Am. Anthropol.* 36, 446–60.
- Kluckhohn, C., Hill, W.W., Kluckhohn, L.W., 1971. Navaho Material Culture. Belknap Press of Harvard University Press, Cambridge, Mass.
- Kluckhohn, C., Leighton, D. (Cross), 1946. Navaho. Harvard University Press, Cambridge.
- Köbben, A.J.F., 1969. Law At The Village Level: The Cottica Djuka Of Surinam, in:

- Law In Culture And Society. Aldine Pub. Co., Chicago, pp. 117–140.
- Kochar, V., 1970. Social organization among the Santal. Editions Indian, Calcutta.
- Kopytoff, I., 1980. Revitalization And The Genesis Of Cults In Pragmatic Religion: The Kita Rite Of Passage Among The Suku, in: Explorations In African Systems Of Thought. Indiana University Press, Bloomington, Indiana.
- Kopytoff, I., 1965. Suku Of Southwestern Congo, in: Peoples Of Africa. Holt, Rinehart and Winston, New York.
- Kopytoff, I., 1964. Family And Lineage Among The Suku Of The Congo, in: Family Estate In Africa. Routledge & K. Paul, London.
- Krämer, A., Nevermann, H., Brant, C., Armstrong, J.M., 1938. Ralik-Ratak (Marshall Islands), in: Ergebnisse Der Südsee-Expedition 1908-1910, Ii ; Ethnographie: B. Mikronesien. Friederichsen, De Gruyter and Co., Hamburg.
- Kratz, C.A., 1991. Amusement And Absolution: Transforming Narratives During Confession Of Social Debts. Am. Anthropol. 93, 826–851.
- Kroeber, A.L., 1925. Handbook Of The Indians Of California, in: Bulletin. Government Printing Office, Washington.
- Kronenberg, A., Schütze, F., 1958. Teda Of Tibesti. Wiener Beiträge Zur Kulturgeschichte Und Linguistik. Berger. Verlag Ferdinand, Horn-Wien, Austria.
- Kruuk, H., 1972. The spotted hyena: a study of predation and social behavior. Echo point books & Media, Vermont.
- Kubary, J.S., 2009. Crime And Criminal Actions In The Palau Islands.
- La Fontaine, J.S., 1959. Gisu Of Uganda, in: Ethnographic Survey Of Africa: East Central Africa. International African Institute, London.



- Ladd, J., 1957. Systematic Reconstruction Of Navaho Ethics, in: Structure Of A Moral Code; A Philosophical Analysis Of Ethical Discourse Applied To The Ethics Of The Navaho Indians. Harvard University Press, Cambridge.
- Lagae, C.R., 1926. Azande Or Niam-Niam: Zande Organizations, Religious And Magical Beliefs, Family Customs, in: Bibliotheque-Congo. Vromant and Co., Bruxelles.
- Lambert, H.E., 1956. Kikuyu Social And Political Institutions. International African Institute, London.
- Lambrecht, F., 1941. Mayawyaw Ritual: Parts 1-5, in: Publications. Catholic Anthropological Conference, Washington, D.C.
- Lane, R.B., Lane, B.S., 1957. Unpublished Field Notes.
- Larken, P.M., 1930. Impressions Of The Azande, in: Sudan Notes And Records. pp. 99–115.
- Latham, R.E., 1909. Ethnology Of The Araucanos. J. R. Inst. Gt. Britain Irel. Vol. 39, 334-370 , 2 plates.
- Le Coeur, C., Schütze, F., 1950. Teda Ethnographic Dictionary Preceded By A French-Teda Lexicon. Mémoires. Librairie Larose, Paris.
- le Roux, A., Snyder-Mackler, N., Roberts, E.K., Beehner, J.C., Bergman, T.J., 2013. Evidence for tactical concealment in a wild primate. Nat. Commun. 4, 1462. <https://doi.org/10.1038/ncomms2468>
- Leach, E.R., 1954. Political Systems Of Highland Burma: A Study Of Kachin Social Structure. Harvard University Press, Cambridge.
- Leach, E.R., 1940. Social And Economic Organisation Of The Rowanduz Kurds. Monographs On Social Anthropology. London School of Economic and Political

Science, London.

Leakey, L.S.B., 1930. Some Notes On The Masai Of Kenya Colony. J. R. Anthropol.

Inst. Gt. Britian Irel. 60, 185–209.

Leenhardt, M., 1979. Do Kamo: Person And Myth In The Melanesian World. University of Chicago Press, Chicago.

Leenhardt, M., 1930. Notes D’Ethnologie NéO-CaléDonienne.

Left Handed, Dyk, W., 1938. Son Of Old Man Hat: A Navaho Autobiography. Harcourt, Brace and Company, New York.

Leighton, A.H., Leighton, D.C., 1944. Navaho Door: An Introduction To Navaho Life. Harvard University Press, Cambridge.

Leighton, D.C., Kluckhohn, C., 1947. Children Of The People: The Navaho Individual And His Development. Harvard Univ. Press, Cambridge.

Léry, J. de, 1906. Extracts out of the Historie of John Leries a Frenchman who lived in Brazil with mons. Villagagnon, ann. 1557- and 58, in: Purchas, S. (Ed.), Hakluytus Posthumus. MacLehose and Sons, Glasgow.

Levak, Z.D., 1974. Kinship System And Social Structure Of The Bororo Of Pobojarí. University Microfilms, Ann Arbor, Michigan.

Lévi-Strauss, C., Sittler, E., 1948. Family And Social Life Of The Nambikwara Indians. Société des Américanistes, Paris.

Levine, D.N., 1965. Wax & Gold: Tradition And Innovation In Ethiopian Culture. University of Chicago Press, Chicago.

Lewis, I.M., 1962. Marriage And The Family In Northern Somaliland, in: East African Studies. East African Institute of Social Research, Kampala, Uganda.

- Lewis, I.M., 1955. Peoples Of The Horn Of Africa: Somali, Afar, And Saho, in:  
Ethnographic Survey Of Africa: Northeastern Africa. International African Institute,  
London.
- Lewis, O., 1951. Life In A Mexican Village: Tepoztlán Restudied. University of Illinois  
Press, Urbana.
- Lin, Y., Pan, J.S., 1947. Lolo Of Liang-Shan. The Commercial Press, Shanghai, China.
- Lingenfelter, S.G., 1975. Political Leadership And Culture Change In Yap. University  
Microfilms, Ann Arbor, Mich.
- Linton, R., 1939. Marquesan Culture, in: Kardiner, A. (Ed.), Individual And His Society:  
The Psychodynamics Of Primitive Social Organization. Columbia University Press,  
New York, pp. 138–196.
- Linton, R., 1933. Tanala, A Hill Tribe Of Madagascar. Publ. 317. Anthropol. Ser.
- Lips, J., 1947. Naskapi Law: Law And Order In A Hunting Society. Trans. Am. Philos.  
Soc. N.S. Vol. 37, 379–492.
- Little, K.L., 1951. Mende Of Sierra Leone, in: International Library Of Sociology And  
Social Reconstruction. Routledge and Kegan Paul, London.
- Lloyd, P.C., 1965. Yoruba Of Nigeria, in: Peoples Of Africa. Rinehart and Winston, Inc,  
New York: Holt.
- Lockwood, Y.R., 1983. Text And Context: Folksong In A Bosnian Muslim Village.  
Slavica Publishers, Columbus, Ohio.
- Loeb, E.M., 1926. Pomo Folkways, in: Publications In American Archaeology And  
Ethnology. University of California Press, Berkeley, Calif.
- Loewen, J.A., 1966. Lengua Indians And Their “Innermost.” Pract. Anthropol. Vol. 13,

252–272.

Lorimer, E.O., 1939. Language Hunting In The Karakoram. Allen and Unwin, London.

Lozios, P., Papataxiarchis, E., 1991. Gender and kinship in marriage and alternative contexts, in: Contested Identities: Gender and Kinship in Modern Greece, Princeton Modern Greek Studies. Princeton University Press, Princeton, N.J., pp. 3–25.

Lumholtz, C., 1973. Unknown Mexico: A Record Of Five Years' Exploration Among The Tribes Of The Western Sierra Madre, The Tierra Calientes Of Tepic And Jalisco; And Among The Tarascos Of Michoacan, in: Antiquities Of The New World Vol.2. AMS Press for Peabody Museum of Archaeology and Ethnology, Harvard University, New York.

Lutfiyya, A.M., 1966. Baytīn A Jordanian Village: A Study Of Social Institutions And Social Change In A Folk Community, in: Studies In Social Anthropology. Mouton, The Hague.

Lynch, J.W., 2005. Male Mating Strategies and Reproductive Constraints in a Group of Wild Tufted Capuchin Monkeys (*Cebus apella nigratus*). Am. J. Primatol. 67, 313–328. <https://doi.org/10.1002/ajp.20188>

Magyara, N., 2009. Multiple mating and female choice in richardson's ground squirrels (*Urocitellus Richardsonii*). University of Lethbridge.

Mair, L.P., 1934. African People In The Twentieth Century. Routledge & Sons, London.

Makal, M., Deedes, W.H., Stirling, A.P., Thomas, L.V., 1954. Village In Anatolia. Vallentine, Mitchell and Co., Ltd., London.

Malinowski, B., 1935. Coral Gardens And Their Magic: A Study Of The Methods Of Tilling The Soil And Of Agricultural Rites, in: The Trobriand Islands. Vol. 1: The

- Description Of Gardening. American Book Company, New York.
- Malinowski, B., 1929. The sexual life of the savages. Readers League of America, New York.
- Malinowski, B., 1927. Sex And Repression In Savage Society. Kegan Paul, Trench, Trubner and Co. Inc., London.
- Malinowski, B., 1926. Myth In Primitive Psychology. W. W. Norton & Co., New York.
- Malinowski, B., 1922. Argonauts Of The Western Pacific: An Account Of Native Enterprise And Adventure In The Archipelagoes Of Melanesian New Guinea. George Routledge & Sons, Ltd., London.
- Malone, M.J., Abate, T., 2012. Culture Summary: British 1714-1815. Human Relations Area Files., New Haven, Conn.
- Malotki, E., Lomatuway'ma, M., 1987. Maasaw: Profile Of A Hopi God, in: American Tribal Religions. University of Nebraska Press, Lincoln.
- Man, E.H., Prain, D., Man, A.F., 1932. Nicobar Islands And Their People. Printed and pub. For the Royal Anthropological Institute of Great Britain and Ireland by Billings and Sons, Guildford, Eng.
- Manjerovic, M.B., Waterman, J.M., 2015. "Failure to launch": Is there a reproductive cost to males living at home? J. Mammal. 96, 144–150.  
<https://doi.org/10.1093/jmammal/gyu015>
- Marlowe, F., 2010. Hadza: Hunter-Gatherers Of Tanzania, in: Origins Of Human Behavior And Culture. University of California Press, Berkeley And Los Angeles.
- Marlowe, F., 2004. Hadza, in: Cultures. Kluwer Academic/Plenum Publishers, New York, pp. 689–696.

- Marshall, H.I., 1945. Karens Of Burma, in: Burma Pamphlets. Longmans, Green and Co, Calcutta.
- Marshall, H.I., 1922. Karen People Of Burma: A Study In Anthropology And Ethnology. Ohio State Univ. Bull.
- Masters, W.M., 1953. Rowanduz: A Kurdish Administrative And Mercantile Center.
- Matthews, W., 1899. Study Of Ethics Among The Lower Races, in: Journal Of American Folk-Lore. Published for the American Folk-lore Society by Houghton, Mifflin, and Co., Boston, pp. 1–9.
- McCulloch, M., 1952. Ovimbundu Of Angola. Ethnographic Survey Of Africa: West Central Africa. International African Institute, London.
- McDonald, D.B., Potts, W.K., 1994. Cooperative Display and Relatedness Among Males in a Lek-Mating Bird. *Science* (80-. ). 266, 1030–1032.  
<https://doi.org/10.1126/science.7973654>
- McIlwraith, T.F., 1948. Bella Coola Indians. Vol. 1. University of Toronto Press, Toronto.
- Mead, M., 1961. Cultural Determinants of Sexual Behavior, in: Young, W.C. (Ed.), *Sex and Internal Secretions*. Williams & Wilkins, Baltimore, pp. 1433–1479.
- Mead, M., 1956. *New Lives For Old: Cultural Transformation--Manus, 1928-1953*. Morrow, New York.
- Mead, M., 1930. *Growing Up In New Guinea: A Comparative Study Of Primitive Education*. W. Morrow & company, New York.
- Mead, M., 1928. *Coming Of Age In Samoa; A Psychological Study Of Primitive Youth For Western Civilisation*. W. Morrow & Company, New York.

- Meek, C.K., 1931. Tribal Studies In Northern Nigeria. Kegan Paul, Trench, Trubner, London.
- Merker, M., 1910. Masai: Ethnographic Monograph Of An East African Semite People. Dietrich Reimer (Ernst Vohsen), Berlin.
- Meskill, J.M.M., 1979. Chinese Pioneer Family: The Lins Of Wu-Feng, Taiwan, 1729-1895. Princeton University Press, Princeton, N.J.
- Messing, S.D., Bender, M.L., 1985. Highland Plateau Amhara Of Ethiopia, in: Ethnography Series. Human Relations Area Files, New Haven, Conn.
- Métraux, A., 1940. Ethnology Of Easter Island. Bulletin. The Museum, Honolulu, Hawaii.
- Meyer, H., Helmut, H., 1916. Barundi: An Ethnological Study Of German East Africa. Ott Spamer, Leipzig.
- Michener, G.R., 1979. Spatial relationships and social organization of adult Richardson's ground squirrels. Can. J. Zool. 57, 125–139.  
<https://doi.org/https://doi.org/10.1139/z79-010>
- Michener, G.R., Mclean, I.G., 1996. Reproductive behaviour and operational sex ratio in Richardson's ground squirrels. Anim. Behav. 52, 743–758.
- Milton, K., 1985. Mating Patterns Of Woolly Spider Monkeys, *Brachyteles Arachnoides*: Implications For Female Choice. Behav. Ecol. Sociobiol. 17, 53–59.  
<https://doi.org/10.1007/BF00299429>
- Monteil, C., Looney, K.A., 1924. Bambara Of Ségou And Kaarta: An Historical, Ethnographical And Literary Study Of A People Of The French Sudan. émile Larose, Paris.

- Mooney, J., 1982. Myths of the Cherokee: and sacred formulas of the Cherokees. C. Elder-Bookseller, Nashville, Tenn.
- Morgan, L.H., Lloyd, H.M., 1901. League Of The Ho-De'-No-Sau-Nee Or Iroquois. Vol. I. Dodd, Mead and Company, New York.
- Mukherjea, C., 1962. The Santals. A. Mukherjee & Co., Private Ltd., Calcutta.
- Muller, M.N., Mitani, J.C., 2005. Conflict and Cooperation in Wild Chimpanzees. *Adv. Study Behav.* 35, 275–331. [https://doi.org/10.1016/S0065-3454\(05\)35007-8](https://doi.org/10.1016/S0065-3454(05)35007-8)
- Müller, W., 1917. Yap, in: Hamburgische Wissenschaftliche Stiftung, Ergebnisse Der Südsee-Expedition 1908-1910, II. L. Friederichsen & Co., Hamburg.
- Mumme, R.L., Bowman, R., Pruett, M.S., Fitzpatrick, J.W., 2015. Natal territory size, group size, and body mass affect lifetime fitness in the cooperatively breeding Florida Scrub-Jay. *Auk* 132, 634–646. <https://doi.org/10.1642/AUK-14-258.1>
- Murdock, G.P., 1934. Kinship And Social Behavior Among The Haida. *Am. Anthropol.* 36, 355–385.
- Murdock, G.P., White, D.R., 1969. Standard Cross-Cultural Sample. *Ethnology* 8, 329–369. <https://doi.org/10.2307/3772907>
- Murphy, R., 1960. Headhunter's heritage: social and economic change among the Mundurucú Indians. University of California Press, Berkeley.
- Murphy, R., 1954. The rubber trade and the Mundurucu village: chapter 2: aboriginal culture. HRAF MS 17–69.
- Murphy, R., Quain, B.H., 1955. The Trumai Indians of central Brazil. J. J. Augustin, Locust Valley, N.Y.
- Murphy, Y., Murphy, R., 1985. Women of the Forest, 2nd ed. Columbia University



- Press, New York.
- Musil, A., 1928. Manners And Customs Of The Rwala Bedouins, in: *Oriental Explorations And Studies*. The American Geographical Society, New York.
- Musters, G.C., 1873. *At Home With The Patagonians*. J. Murray, London.
- Nadel, S.F., 1954. *Nupe Religion*. Routledge & Paul, London.
- Nadel, S.F., Lugard, F., Dealtry, J., 1942. *Black Byzantium: The Kingdom Of Nupe In Nigeria*. Pub. for the International Institute of African languages & cultures by the Oxford university press.
- Nagata, J.A., 1987. *Continuity And Change Among The Old Order Amish Of Illinois*. University Microfilms, Ann Arbor, Michigan.
- Naik, T.B., 1956. *Bhils: A Study*. Bharatiya Adimjati Sevak Sangh, Delhi.
- Nakane, C., 1967. *Garo And Khasi: A Comparative Study In Matrilineal Systems*. Mouton, Paris.
- Nash, J.C., 1970. *In The Eyes Of The Ancestors: Belief And Behavior In A Mayan Community*. Yale University Press, New Haven, Conn.
- Nelson-Flower, M.J., Ridley, A.R., 2015. Male-male competition is not costly to dominant males in a cooperatively breeding bird. *Behav. Ecol. Sociobiol.* 69, 1997–2004. <https://doi.org/10.1007/s00265-015-2011-0>
- Newcomb, W.W., 1956. The culture and acculturation of the Delaware Indians, in: *Anthropological Papers*. University of Michigan, Ann Arbor.
- Newton, J., 1989. *Women And Modern Marriage Among The Orokaivans*. Canberra Anthropol. 12, 28–47.
- Nimuendaju, C., Lowie, R.H., 1946. *Eastern Timbira*, in: *University Of California*

Publications In American Archaeology And Ethnology. Universtiy of California Press, Berkeley And Los Angeles.

Nishida, T., 1980. The leaf-clipping display: A newly-discovered expressive gesture in wild chimpanzees. *J. Hum. Evol.* 9, 117–128.

Nooy-Palm, H., 1986. Sa'Dan-Toraja: A Study Of Their Social Life And Religion, in: *Verhandelingen Van Het Koninklijk Instituut Voor Taal-, Land-, En Volkenkunde*. Martinus Nijhoff, The Hague.

Nordenskiöld, E., érez Kantule, R., Wassén, H., 1938. Historical And Ethnological Survey Of The Cuna Indians, in: *Comparative Ethnographical Studies*. Göteborg Museum, Göteborg, Sweden.

Norins, M.R., Lattimore, O., 1944. Gateway To Asia: Sinkiang, Frontier Of The Chinese Far West, The John D. ed. New York.

Nyakatura, J.W., Rigby, Z.K., 1970. Aspects Of Bunyoro Customs And Tradition. East African Literature Bureau, Nairobi.

Oberg, K., 1949. Terena And The Caduveo Of Southern Mato Grosso, Brazil. United States Government Printing Office, Washington, D. C.

Oliver, D.L., 1955. Solomon Island Society: Kinship And Leadership Among The Siuai Of Bougainville. Harvard University Press, Cambridge.

Olson, R.L., 1936. Quinault Indians, in: *University Of Washington Publications In Anthropology*. The University of Washington, Seattle, Wash.

Opler, M.E., 1941. Apache Life-Way: The Economic, Social, And Religious Institutions Of The Chiricahua Indians. University of Chicago Press, Chicago.

Opler, M.K., 1963. The southern Ute of Colorado, in: *Acculturation in Seven American*

- Indian Tribes. Peter Smith Publisher, Gloucester, Mass., pp. 119–206.
- Osgood, C., 1958. Ingalik Social Culture. the Dept. of Anthropology, Yale University, by The Yale University Press, New Haven, Conn.
- Packer, C., Pusey, A.E., 1982. Cooperation and competition within coalitions of male lions: kin selection or game theory? *Nature* 296, 740–742.  
<https://doi.org/10.1038/296740a0>
- Park, W.Z., 1965. Tribes Of The Sierra Nevada De Santa Marta, Colombia, in: Steward, J.H. (Ed.), *Handbook Of South American Indians*. U.S. Govt. Print. Off., Washington, DC.
- Parsons, E.W.C., 1970. Mitla, Town Of The Souls And Other Zapoteco-Speaking Pueblos Of Oaxaca, Mexico University Of Chicago, in: *Publications In Anthropology; Ethnological Series*. University of Chicago Press, Chicago, Illinois.
- Pehrson, R.N., 1957. Bilateral Network Of Social Relations In Könkämä Lapp District. Indiana University Publications., Bloomington, Indiana.
- Pellisson, M., Wilkinson, M., 1897. Roman Life In Pliny's Time. Chatauqua Literary And Scientific Circle. Flood and Vincent, Chatauqua-Century Press, Meadville, Pa.
- Pelto, J.P., 1962. Individualism In Skolt Lapp Society. *Kansatieteellinen Arkisto*. Suomen Muinaismuistoyhdistys (Finnish Antiquities Society), Helsinki.
- Perel, J., 1996. Competition for breeding between Arabian babbler males. MSc thesis, Tel-Aviv Univ.
- Pinto, E.R., Brunel, A., 1938. Rondonia. *Brasiliana: Ser. 5 Of The Biblioteca Pedagogica Brasileira*. Companhia Editora Nacional, São Paulo.
- Popov, A.A., 1946. Family Life Of The Dolgani People. *Sov. Ethnogr.* 4.

- Pospisil, L.J., 1978. Kapauku Papuans Of West New Guinea, in: Case Studies In Cultural Anthropology. Holt, Rinehart, and Winston., New York.
- Pospisil, L.J., 1958. Kapauku Papuans And Their Law. Yale University Publications In Anthropology, New Haven, Conn.
- Powdermaker, H., 1968. After Freedom: A Cultural Study In The Deep South, in: Studies In American Negro Life. Atheneum, New York.
- Powdermaker, H., 1933. Life In Lesu: The Study Of A Melanesian Society In New Ireland. W. W. Norton & Company, Inc., New York.
- Powdermaker, H., 1931. Vital Statistics Of New Ireland (Bismarck Archipelago) As Revealed In Genealogies. Hum. Biol. 3, 351–75.
- Price, D., 1981. Nambiquara Leadership. Am. Ethnol. 8, 686–708.
- Price, S., 1993. Co-Wives And Calabashes, in: Women And Culture. University of Michigan Press, Ann Arbor.
- Quinn, J.S., Woolfenden, G.E., Fitzpatrick, J.W., White, B.N., 1999. Multi-locus DNA fingerprinting supports genetic monogamy in Florida scrub-jays. Behav. Ecol. Sociobiol. 45, 1–10. <https://doi.org/10.1007/s002650050534>
- Radcliffe-Brown, A.R., 1922. Andaman Islanders: A Study In Social Anthropology. Cambridge University Press, Cambridge.
- Rapoport, R.N., 1954. Changing Navaho Religious Values: A Study Of Christian Missions To The Rimrock Navahos, in: Reports Of The Rimrock Project. Values Series. The Museum, Cambridge.
- Ray, V.F., 1938. “Lower Chinook Ethnographic Notes” University Of Washington Publications In Anthropology. University of Washington, Seattle.

- Razi, Z., 1985. Religion and Society: Sexual behaviour in the peasant society/ דת וחברה: זמנים רבעון. יחסי מין בחברת האיכרים באנגליה הפוריטנית ובאנגליה העולצת (in Hebrew). Zmanim A Hist. Quarterly 17, 68–81.
- Redfield, R., Rojas Villa, A., 1962. Chan Kom: A Maya Village. University of Chicago Press., Chicago, Illinois.
- Reichard, G.A., 1950. Navaho Religion: A Study Of Symbolism. Bollinger Foundation, New York.
- Reichel-Dolmatoff, G., 1990. Sacred Mountain Of Colombia's Kogi Indians. Iconography Of Religions. E.J. Brill., Leiden.
- Reichel-Dolmatoff, G., Muirden, S., 1951. Kogi: A Tribe Of The Sierra Nevada De Santa Marta, Colombia. Vol. 2. Editorial Iqueima, Bogota.
- Reichel-Dolmatoff, G., Muirden, S., 1949. Kogi: A Tribe Of The Sierra Nevada De Santa Marta, Colombia. Vol. 1. El Instituto., Revista. Bogota.
- Reid, J.P., 1970. A law of blood: the primitive law of the Cherokee nation. New York University Press, New York.
- Reiss, W., 1880. Visit Among The Jivaro Indians. Verhandlungen Der Gesellschaft Für Erdkd. Zu Berlin 7, 325–37.
- Ridpath, M.G., 1972. The tasmanian native hen, *Tribonyx mortierii*. II. The individual, the group, and the population. Wildl. Res. 17, 53–90.
- Rockman, H., 1993. Sex shmex - as long as you love your wife: A review of the laws and guidelines regarding sexual behaviour among orthodox Jews. Sex. Marital Ther. 8, 255–267. <https://doi.org/10.1080/02674659308404972>
- Rohner, R.P., Chaki-Sircar, M., Connecticut, U.O., 1988. Women And Children In A

Bengali Village. Published for University of Connecticut, University Press of New England, Hanover, Conn.

Rood, J.P., 1990. Group size, survival, reproduction, and routes to breeding in dwarf mongooses. *Anim. Behav.* 39, 566–572. [https://doi.org/10.1016/S0003-3472\(05\)80423-3](https://doi.org/10.1016/S0003-3472(05)80423-3)

Roscoe, J., 1923. Mackie Ethnological Expedition To Central Africa Bakitara Or Banyoro: The First Part Of The Report Of The Mackie Ethnological Expedition To Central Africa. Cambridge University Press, Cambridge.

Roscoe, J., 1911. Baganda: An Account Of Their Native Customs And Beliefs. Macmillan and Co., London.

Rosen, E. von, 1924. Choroti, in: *Ethnographical Research Work During The Swedish Chaco-Cordillera Expedition, 1901-1902*. C. E. Fritze, Ltd., Stockholm.

Rouch, J., 1954. The Songhay. *African Ethnological Monographs*. University Presses of France., Paris.

Routledge, S., 1919. *Mystery Of Easter Island: The Story Of An Expedition*. Printed for the author by Hazell, Watson and Viney, Ltd, London.

Roy, M., 1975. *Bengali Women*. University of Chicago Press, Chicago.

Rubenstein, D.R., 2007. Female extrapair mate choice in a cooperative breeder: trading sex for help and increasing offspring heterozygosity. *Proc. R. Soc. B Biol. Sci.* 1895–1903.

Saggs, H.W.F., 1988. *Greatness That Was Babylon: A Survey Of The Ancient Civilization Of The Tigris-Euphrates Valley*. Sidgwick and Jackson, London.

Sahagún, B. de, Arthur, A., Dibble, C.E., 1974. *General History Of The Things Of New*

- Spain: Florentine Codex: Book 10 -- The People. The School of American Research and the University of Utah., Sante Fe, New Mexico.
- Sahagún, B. de, Arthur, A.J.O., Dibble, C.E., 1957. General History Of The Things Of New Spain: Florentine Codex: Book 4 -- The Soothsayers And Book 5 -- The Omens. The School of American Research and the University of Utah., Sante Fe, New Mexico.
- Salomon, C., Hamelin, C., 2008. Challenging Violence: Kanak Women Renegotiating Gender Relations In New Caledonia. *Asia Pacific J. Anthr.* Vol. 9, 29–46.
- Santos, E.S.A., Santos, L.L.S., Lagisz, M., Nakagawa, S., 2015. Conflict and cooperation over sex: The consequences of social and genetic polyandry for reproductive success in dunnocks. *J. Anim. Ecol.* 84, 1509–1519. <https://doi.org/10.1111/1365-2656.12432>
- Schaller, G.E., 1963. The mountain gorilla: ecology and behavior. University of Chicago Press, Chicago, Illinois.
- Schapera, I., 1930. Culture Of The Hottentots. Khoisan Peoples Of South Africa; Bushmen And Hottentots. G. Routledge, London.
- Schebesta, P., Schütze, F., 1957. Negritos Of Asia; Vol. 2, Ethnography Of The Negritos: Half-Vol. 1, Religion And Mythology, in: *Studia Instituti Anthropos. St. -Gabriel-Verlag, Wien-Mödling.*
- Schebesta, P., Schütze, F., 1954. Negritos Of Asia; Vol. 2. Ethnography Of The Negritos: Half-Vol. 1, Economy And Sociology, in: *Studia Instituti Anthropos. St. -Gabriel-Verlag, Wien-Mödling.*
- Scheffer, J., 1704. History Of Lapland: Containing A Geographical Description, And A

Natural History Of That Country; With An Account Of The Inhabitants, Their Original, Religion, Customs, Habits, Marriages, Conjurations, Employments, Etc. Printed for Tho. newborough, at the Golden-Ball in St. Paul's-Church-Yard and R. Parker under the Royal-Exchange, London.

Schlegel, A., 2000. Culture Summary: Hopi.

Schlegel, A., 1988. Hopi Family Structure And The Experience Of Widowhood, in: On Their Own : Widows And Widowhood In The American Southwest 1848-1939. University of Illinois Press, Urbana And Chicago, pp. 42–64.

Schram, L., 1957. Monguors Of The Kansu-Tibetan Frontier: Part Ii. Their Religious Life. American Philosophical Society, Transactions. Philadelphia, Pa.

Schram, L., Lattimore, O., 1954. Monguors Of The Kansu-Tibetan Frontier: Their Origin, History And Social Organization. Transactions. American Philosophical Society, Philadelphia, Pa.

Schram, L., Winchell, J.H., 1932. Marriage Among The T'U-Jen Of Kansu (China), in: Variétés Sinologiques. Catholic Mission Press, Shanghai, China.

Schultze, L., Knight, S., Ziolkowski, T., 1907. In Namaland And The Kalahari. Gustav Fischer, Jena.

Schwartz, S.B., 1985. Sugar Plantations In The Formation Of Brazilian Society: Bahia, 1550-1835, in: Cambridge Latin American Studies. Cambridge University Press, Cambridge.

Schwimmer, E.G., 1973. Exchange In The Social Structure Of The Orokaiva: Traditional And Emergent Ideologies In The Northern District Of Papua. C. Hurst., London.

Seligman, C.G., Seligman, B.Z., 1932. Pagan Tribes Of The Nilotic Sudan. George



Routledge and Sons Ltd., London.

Seligman, C.G., Seligman, B.Z., Myers, C.S., Mendis, Gunasekara, A., 1911. Veddass, in:

Archaeological And Ethnological Series. Cambridge University Press, Cambridge.

Serpenti, L.M., 1965. Cultivators In The Swamp: Social Structure And Horticulture In A

New Guinea Society (Frederik-Hendrik Island, West New Guinea), in:

Samenlevingen Buiten Europa. Non-European Societies. Van Gorcum, Assen.

Shackleton, D.M., 1985. *Ovis canadensis*. Mamm. Species 1–9.

Sherap, P., Combe, G.A., 1926. Tibetan On Tibet: Being The Travels And Observations

Of Mr. Paul Sherap (Dorje ZöDba) Of Tachienlu. T. Fisher Unwin, Ltd., London.

Shirokogorov, S.M., 1924. Social Organization Of The Manchus: A Study Of The

Manchu Clan Organization. Extra Volume. Royal Asiatic Society, Shanghai, China.

Shkilnyk, A.M., 1985. Poison Stronger Than Love: The Destruction Of An Ojibwa

Community. Yale University Press, New Haven, Conn.

Shrenk, L.I., Nagler, A., 1881. Peoples Of The Amur Region, in: *Reisen Und*

*Forschungen Im Amur-Lande In Den Jahren 1854-1856*. Kaiserliche Akademie der

Wissenschaften, St. Petersburg.

Shternberg, L.Ia., Bromwich, L., Ward, N., 1933. Gilyak, Orochi, Goldi, Negidal, Ainu:

Articles And Materials. Dal’giz, Khabarovsk.

Sieroszewski, W., 1993. Yakut: An Experiment In Ethnographic Research. *Assotsiatsiia*

*Rossiiskaia polit. entsiklopediia*, Moskva.

Simpson, G.E., 1942. Sexual And Familial Institutions In Northern Haiti. *Am. Anthropol.*

44, 655–674.

Skoggard, I.A., 1999. Culture Summary: Arab Canadians.

- Skrefsrud, L.O., Bodding, P.O., Konow, S., 1942. Traditions and institutions of the Santals, in: Bulletin. Oslo Etnografiske Museum, Oslo.
- Smith, D.M., 1982. Moose-Deer island house people: a history of the native people of Fort Resolution, in: Mercury Series. National Museums of Canada, Ottawa.
- Smith, D.R., 1983. Palauan Social Structure. Rutgers University Press, New Brunswick.
- Smith, J.G.E., 1981. Western Woods Cree, in: Handbook Of North American Indians. Subarctic. Smithsonian Institution Press, Washington, D.C.
- Smithson, C.L., 1959. Havasupai Woman, in: Anthropological Papers. University of Utah Press, Salt Lake City.
- Snyder-Mackler, N., Alberts, S.C., Bergman, T.J., 2012. Concessions of an alpha male? Cooperative defence and shared reproduction in multi-male primate groups. *Proc. R. Soc. B Biol. Sci.* 279, 3788–3795. <https://doi.org/10.1098/rspb.2012.0842>
- Soini, P., 1988. The Pygmy Marmoset, Genus *Cebuella*, in: Mittermeier, R.A., Rylands, A., Coimbra-Filho, A.F., Fonseca, G.A.B. (Eds.), *The Ecology and Behavior of Neotropical Primates*, Vol. II. World Wildlife Fund, Washington, DC, pp. 79–129.
- Soini, P., 1987. Sociosexual behavior of a free-ranging *Cebuella pygmaea* (*Callitrichidae, platyrrhini*) troop during postpartum estrus of its reproductive female. *Am. J. Primatol.* 13, 223–230. <https://doi.org/10.1002/ajp.1350130302>
- Soustelle, J., O'Brian, P., 1961. *Daily Life Of The Aztecs On The Eve Of The Spanish Conquest*. Daily Life Series. Weidenfeld and Nicolson., London.
- Southwold, M., 1965. Ganda Of Uganda, in: *Peoples Of Africa*. Rinehart and Winston, New York: Holt.
- Speiser, F., Schütze, F., 1916. *Ethnological Data On The Santa Cruz Islands*, in:

- Ethnologica 2. HRAF, Leipzig, p. ms: 1–131 [Original: 153–214].
- Spencer, P., 1988. Maasai Of Matapato: A Study Of Rituals Of Rebellion, in:  
International African Library. Indiana University Press, Bloomington, Ind.
- Spier, L., 1933. Yuman Tribes Of The Gila River. University of Chicago Press, Chicago.
- Spier, L., 1930. Klamath Ethnography, in: Publications In American Archaeology And  
Ethnology. University of California Press, Berkeley, California.
- Spier, L., 1928. Havasupai Ethnography, in: Anthropological Papers Of The American  
Museum Of Natural History. The Trustees, New York.
- Staden, H., 1928. Hans Staden: the true story of his captivity, 1557. George Routledge  
and Sons, New York.
- Steward, J.H., Manners, R.A., Wolf, E.R., Padilla, E., Mintz, S.W., Scheele, R.L., 1956.  
People Of Puerto Rico: A Study In Social Anthropology, in: Social Science  
Research Center Study. University of Illinois Press, Urbana.
- Stirling, A.P., 1965. Turkish Village, in: Nature Of Human Society Series. Weidenfeld  
and Nicolson, London.
- Stoinski, T.S., Rosenbaum, S., Ngaboyamahina, T., Vecellio, V., Ndagijimana, F.,  
Fawcett, K., 2009. Patterns of male reproductive behaviour in multi-male groups of  
mountain gorillas: examining theories of reproductive skew. Behaviour 146, 1193–  
1215. <https://doi.org/10.1163/156853909X419992>
- Strickland, R., 1975. Fire and the spirits: Cherokee law from clan to court, in: Civilization  
of the American Indian Series. University of Oklahoma Press, Norman.
- Strier, K.B., 1997. Subtle Cues of Social Relations in Male Muriqui Monkeys  
(*Brachyteles arachnoides*), in: Warren, K.G. (Ed.), New World Primates: Ecology,

- Evolution, and Behavior. Aldine de Gruyter, New York, pp. 109–118.
- Suggs, R.C., 1963. Marquesan sexual behavior (unpublished manuscript). EHRAF, New Haven, Conn.
- Surbeck, M., Langergraber, K.E., Fruth, B., Vigilant, L., Hohmann, G., 2017. Male reproductive skew is higher in bonobos than chimpanzees. *Curr. Biol.* 27, R640–R641. <https://doi.org/10.1016/j.cub.2017.05.039>
- Sverdrup, H.U., 1938. *With The People Of The Tundra*. Gyldendal Norsk Forlag, Oslo, Norway.
- Swanton, J.R., 1928. U.S. Bureau Of American Ethnology: Forty-Second Annual Report. Annual Report. U.S. Govt. Print. Off., Washington, D.C.
- Swanton, J.R., 1911. Natchez Group, in: *Indian Tribes Of The Lower Mississippi And Adjacent Coast Of The Gulf Of Mexico*, Bulletin. Govt. Printing Office, Washington, pp. 45–274.
- Swanton, J.R., 1905. Contributions To The Ethnology Of The Haida, in: *Memoir Of The American Museum Of Natural History*. Leiden: E. J. Brill ; G. E. Stechert & Co, New York.
- Swartz, M.J., 1966. Bases For Political Compliance In Bena Villages, in: *Political Anthropology*. Aldine Pub. Co., Chicago, pp. 89–108.
- Swartz, M.J., 1958. Sexuality And Aggression On Romonum, Truk. *Am. Anthropol.* Vol. 60, 467–486.
- Talayesva, D.C., Simmons, L.W., 1942. *Sun Chief: The Autobiography Of A Hopi Indian*. Pub. for the Institute of Human Relations by Yale University Press ; H. Milford, Oxford University Press, New Haven.

- Tapper, B.E., 1987. Rivalry And Tribute: Society And Ritual In A Telegu Village In South India, in: Studies In Sociology And Social Anthropology. Hindustan Pub.Corp., Delhi.
- Taylor, R.B., 1979. Teotilan Del Valle: A Typical Mesoamerican Community. University Microfilms, Ann Arbor.
- Terborgh, J., Goldizen, A.W., 1985. On the mating system of the cooperatively breeding saddle-backed tamarin (*Saguinus fuscicollis*). Behav. Ecol. Sociobiol. 16, 293–299.  
<https://doi.org/10.1007/BF00295541>
- Thevet, A., 1878. The peculiarities of French Antarctica, otherwise called (French) America: the islands discovered in our times. Maisonneuve et cie, Paris.
- Thompson, L., 1940a. Fijian Frontier, in: Studies Of The Pacific. American Council, Institute of Pacific Relations, San Francisco, Calif.
- Thompson, L., 1940b. Southern Lau, Fiji: An Ethnography. Bulletin. Bernice P. Bishop Museum, Honolulu, Hawaii.
- Titiev, M., 1951. Araucanian Culture In Transition, in: Occasional Contributions From The Museum Of Anthropology Of The University Of Michigan. University of Michigan Press, Ann Arbor.
- Titiev, M., 1944. Old Oraibi: A Study Of The Hopi Indians Of The Third Mesa, in: Papers. Kraus Reprint Co., New York.
- Tobe, J.H., 1960. Hunza: Adventures In A Land Of Paradise. Rodale Books, Emmaus, Pa.
- Tokuyama, N., Furuichi, T., 2016. Do friends help each other? Patterns of female coalition formation in wild bonobos at Wamba. Anim. Behav. 119, 27–35.

<https://doi.org/10.1016/j.anbehav.2016.06.021>

Townsend, S.W., Deschner, T., Zuberbühler, K., 2008. Female chimpanzees use copulation calls flexibly to prevent social competition. *PLoS One* 3.

<https://doi.org/10.1371/journal.pone.0002431>

Tran-van-Trai, Messner, C.A., 1942. The Annamese patriarchal family. P. Lapagesse, Paris.

Turnbull, C.M., 1983. Mbuti Pygmies: Change And Adaptation, in: Orlando, F. (Ed.), *Case Studies In Cultural Anthropology*. Harcourt Brace Jovanovich College Publishers.

Turnbull, C.M., 1965. Mbuti Pygmies: An Ethnographic Survey, in: *Anthropological Papers*. American Museum of Natural History, New York.

Turnbull, C.M., 1962. *Forest People*. Simon and Schuster., New York.

Turner, G., 1884. *Samoa, A Hundred Years Ago And Long Before: Together With Notes On The Cults And Customs Of Twenty-Three Other Islands In The Pacific*. Macmillan and co., London.

Turrado Moreno, A., Muirden, S., 1945. *Ethnography Of The Guarauno Indians*, in: *Tercera Conferencia Interamericana De Agricultura, Cuadernos Verdes. Lit. y Tip*. Vargas, Caracas.

Tutin, C.E.G., McGinnis, P.R., 1981. Chimpanzee reproduction in the wild, in: Graham, C. (Ed.), *Reproductive Biology of the Great Apes: Comparative and Biomedical Perspectives*. Academic Press, pp. 239–264. <https://doi.org/10.1016/B978-0-12-295020-9.50015-7>

Valadez, S., 1996. *Wolf Power And Interspecies Communication In Huichol Shamanism*,

- in: *People Of The Peyote: Huichol Indian History, Religion, & Survival*. University of New Mexico Press, Albuquerque.
- Van Belle, S., Estrada, A., Ziegler, T.E., Strier, K.B., 2009. Sexual behavior across ovarian cycles in wild black howler monkeys (*Alouatta pigra*): Male mate guarding and female mate choice. *Am. J. Primatol.* 71, 153–164.  
<https://doi.org/10.1002/ajp.20635>
- Van Belle, S., Garber, P.A., Estrada, A., Di Fiore, A., 2014. Social and genetic factors mediating male participation in collective group defence in black howler monkeys. *Anim. Behav.* 98, 7–17. <https://doi.org/10.1016/j.anbehav.2014.09.023>
- Van Valkenburgh, R.F., 1938. Navaho Common Law Iii: Etiquette-Hospitality-Justice, in: *Museum Notes Of The Museum Of Northern Arizona*. Northern Arizona Society of Science and Art, Flagstaff, Arizona, pp. 39–45.
- Van Velsen, J., 1964. *Politics Of Kinship: A Study In Social Manipulation Among The Lakeside Tonga Of Nyasaland*. Manchester University Press, Manchester, U.K.
- VanStone, J.W., 1963. The Snowdrift Chipewyan, in: *Northern Co-Ordination and Research Centre*. Northern Co-ordination and Research Centre, Dept. of Northern Affairs and National Resources, Ottawa, Ont.
- Voegelin, E.W., 1938. “Tübatulabal Ethnography” *Anthropological Records*. University of California Press, Berkeley.
- Vreeland, H.H., 1973. *Mongol Community And Kinship Structure*. Greenwood Press, Westport, Conn.
- Wafer, L., 1934. *New Voyage And Description Of The Isthmus Of America*, in: *Hakluyt Society*. Printed for the Hakluyt Society, Oxford.

- Wagley, C., 1949. Social And Religious Life Of A Guatemalan Village. Memoirs. American Anthropological Association, Menasha, Wisconsin.
- Walker, M.K., 1984. Social Constraints, Individuals, And Social Decisions In A Scottish Rural Community. University Microfilms, Ann Arbor, Michigan.
- Wallace, A.F.C., Steen, S.K., 1969. Death And Rebirth Of The Seneca. Vintage Books, a division of Random House, New York.
- Waterman, J.M., 1998. Mating tactics of male Cape ground squirrels, *Xerus inauris*: consequences of year-round breeding. Anim. Behav. 56, 459–466.  
<https://doi.org/10.1006/anbe.1998.0780>
- Waterman, J.M., 1995. The Social organization of the Cape ground squirrel (*Xerus Inauris*; Rodentia: Sciuridae). Ethology 101, 130–147.  
<https://doi.org/10.1111/j.1439-0310.1995.tb00352.x>
- Watson, L.C., 1968. Guajiro Personality And Urbanization, in: Latin American Studies. Latin American Center. University of California, Los Angeles.
- Watts, D.P., 1990. Mountain Gorilla Life Histories, Reproductive Competition, and Sociosexual Behavior and Some Implications for Captive Husbandry. Zoo Biol. 9, 185–200. <https://doi.org/10.1002/zoo.1430090302>
- Weltfish, G., 1965. Lost Universe: With A Closing Chapter On ‘The Universe Regained.’ Basic Books, New York.
- White, D.R., 1989. Focused ethnographic bibliography: Standard Cross-Cultural Sample. Behav. Sci. Res. 23, 1–145.
- White, L.A., 1962. “Pueblo Of Sia, New Mexico” Bulletin. U.S. Govt. Print. Off, Washington.



- Whiting, B.B., 1950. Paiute Sorcery, in: Viking Fund Publications In Anthropology. The Viking Fund Inc, New York.
- Whiting, J.W.M., 1970. Kwoma Journal. Human Relations Area Files, New Haven, Conn.
- Whiting, J.W.M., 1941. Becoming A Kwoma: Teaching And Learning In A New Guinea Tribe. Yale University Press, New Haven, Conn.
- Williams, F.E., Murray, H., 1930. Orokaiva Society. Oxford University Press, London.
- Wiser, C.V., Wiser, H.W., 1930. Behind Mud Walls. R. R. Smith, New York.
- Wolf, A.P., 1969. Marriage And Adoption In A Hokkien Village. University Microfilms, Ann Arbor, Mich.
- Wolf, A.P., Huang, C., 1980. Marriage And Adoption In China, 1845-1945. Stanford University Press, Stanford, Calif.
- Wolf, K.L., 1972. Growing Up And Its Price In Three Puerto Rican Subcultures, in: Portrait Of A Society: Readings On Puerto Rican Sociology. University of Puerto Rico Press, Rio Piedras, pp. 233–275.
- Wolf, M., 1968. House Of Lim: A Study Of A Chinese Farm Family. Appleton-Century-Crofts, New York.
- Wong, B.P., 1982. Chinatown, Economic Adaptation And Ethnic Identity Of The Chinese, in: Case Studies In Cultural Anthropology. Holt, Rinehart and Winston, Inc., Fort Worth, Tex.
- Yang, E.S., 1987. Korean Women In America: 1903-1930, in: Korean Women In Transition: At Home And Abroad. Center for Korean-American and Korean Studies, California State University, Los Angeles, Los Angeles, Calif., pp. 167–181.

- Young, A.J., Spong, G., Clutton-Brock, T.H., 2007. Subordinate male meerkats prospect for extra-group paternity: alternative reproductive tactics in a cooperative mammal. *Proc. R. Soc. B Biol. Sci.* 274, 1603–1609. <https://doi.org/10.1098/rspb.2007.0316>
- Zahavi, A., 1989. Arabian Babbler, in: Newton, I. (Ed.), *Lifetime Reproduction in Birds*. Academic Press, London, pp. 253–275.
- Zann, R., 1996. *The zebra finch: a synthesis of field and laboratory studies*. Oxford University Press, Oxford.
- Zeisberger, D., Hulbert, A.B., Schwarze, W.N., 1910. David Zeisberger's history of northern American Indians, in: *Ohio Archaeological and Historical Publications*. Published for the Society by Fred J. Heer, Columbus, Ohio.
- Zhao, Q.-K., 1996. Male-infant-male interactions in Tibetan macaques. *Primates* 37, 135–143. <https://doi.org/10.1007/BF02381401>
- Zhao, Q.-K., 1993. Sexual behavior of Tibetan macaques at Mt. Emei, China. *Primates* 34, 431–444. <https://doi.org/10.1007/BF02382652>
- Zhou, D., Pelliot, P., Paul, J.G.D., 1987. *Customs Of Cambodia*. The Siam Society, Bangkok.
- Zingg, R.M., 1938. *Report Of The Mr. And Mrs. Henry Pfeiffer Expedition For Huichol Ethnography: The Huichols: Primitive Artists. Contributions To Ethnography*. G.E. Stechert and Company, New York.
